# Supplementary material for: Design, synthesis and antiviral evaluation of triazole-linked 7-hydroxycoumarin–monoterpene conjugates as inhibitors of RSV replication
Source: Royal Society of Chemistry journal article supplement (doi:10.1039/d4md00728j), 2024-12-02
Supplement: d4md00728j2.pdf [file d4md00728j2.pdf]

## Supplementary Information

### Design, synthesis and antiviral evaluation of triazole-linked 7-hydroxycoumarin – monoterpene conjugates as inhibitors of RSV replication

Dmitry O. Tsypyshev<sup>a</sup>, Artem M. Klabukov<sup>b</sup>, Daria N. Razgulaeva<sup>b</sup>, Anastasia V. Galochkina<sup>b</sup>, Anna A. Shtro<sup>b</sup>, Sophia S. Borisevich<sup>c</sup>, Tatyana M. Khomenko<sup>a</sup>, Konstantin P. Volcho<sup>a,\*</sup>, N.I. Komarova<sup>a</sup>, Nariman F. Salakhutdinov<sup>a</sup>

<sup>a</sup> Department of Medicinal Chemistry, N. N. Vorozhtsov Novosibirsk Institute of Organic Chemistry, 9, Akademika Lavrentieva Ave., 630090, Novosibirsk, Russia

<sup>b</sup> Laboratory of Chemotherapy for Viral Infections, Smorodintsev Research Institute of Influenza, Professor Popova Str., 15/17, 197376, St. Petersburg, Russia

<sup>c</sup> Laboratory of Physical Chemistry, Ufa Chemistry Institute of the Ufa Federal Research Center, 71, Octyabrya pr., 450054, Ufa, Russia

1. NMR <sup>1</sup>H and <sup>13</sup>C spectra of the compounds 10, 20 and 37-55.
2. HRMS spectra of the compounds 10, 20, and 37-55.
3. 2D spectra of compounds 37, 43, 50, 54Z, 54E
4. UHPLC of compounds.
5. Synthesis of compounds 23-31.
6. References

1. NMR  $^1\text{H}$  and  $^{13}\text{C}$  spectra of the compounds 10, 20 and 37-55.

Fig. S1.  $^1\text{H}$  spectra of Compound 20

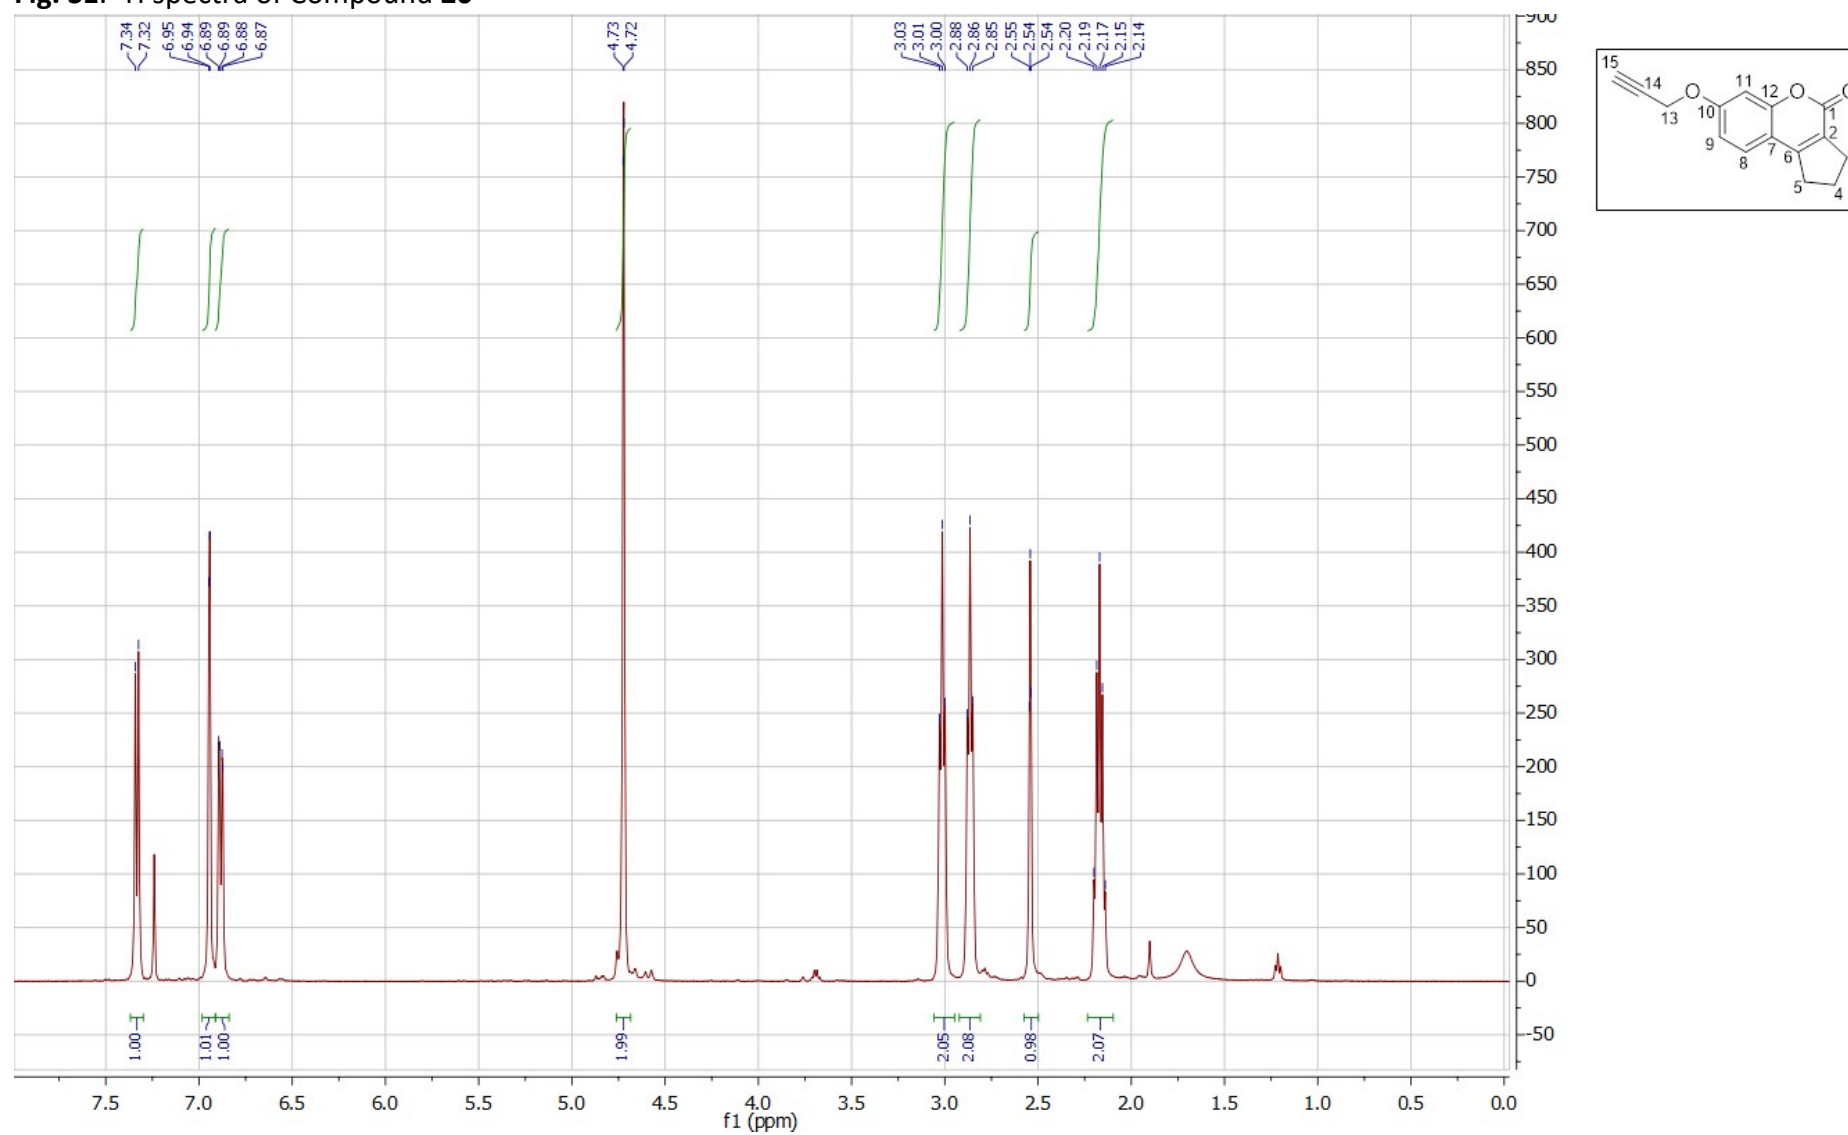

Fig. S2.  $^{13}\text{C}$  spectra of Compound 20.

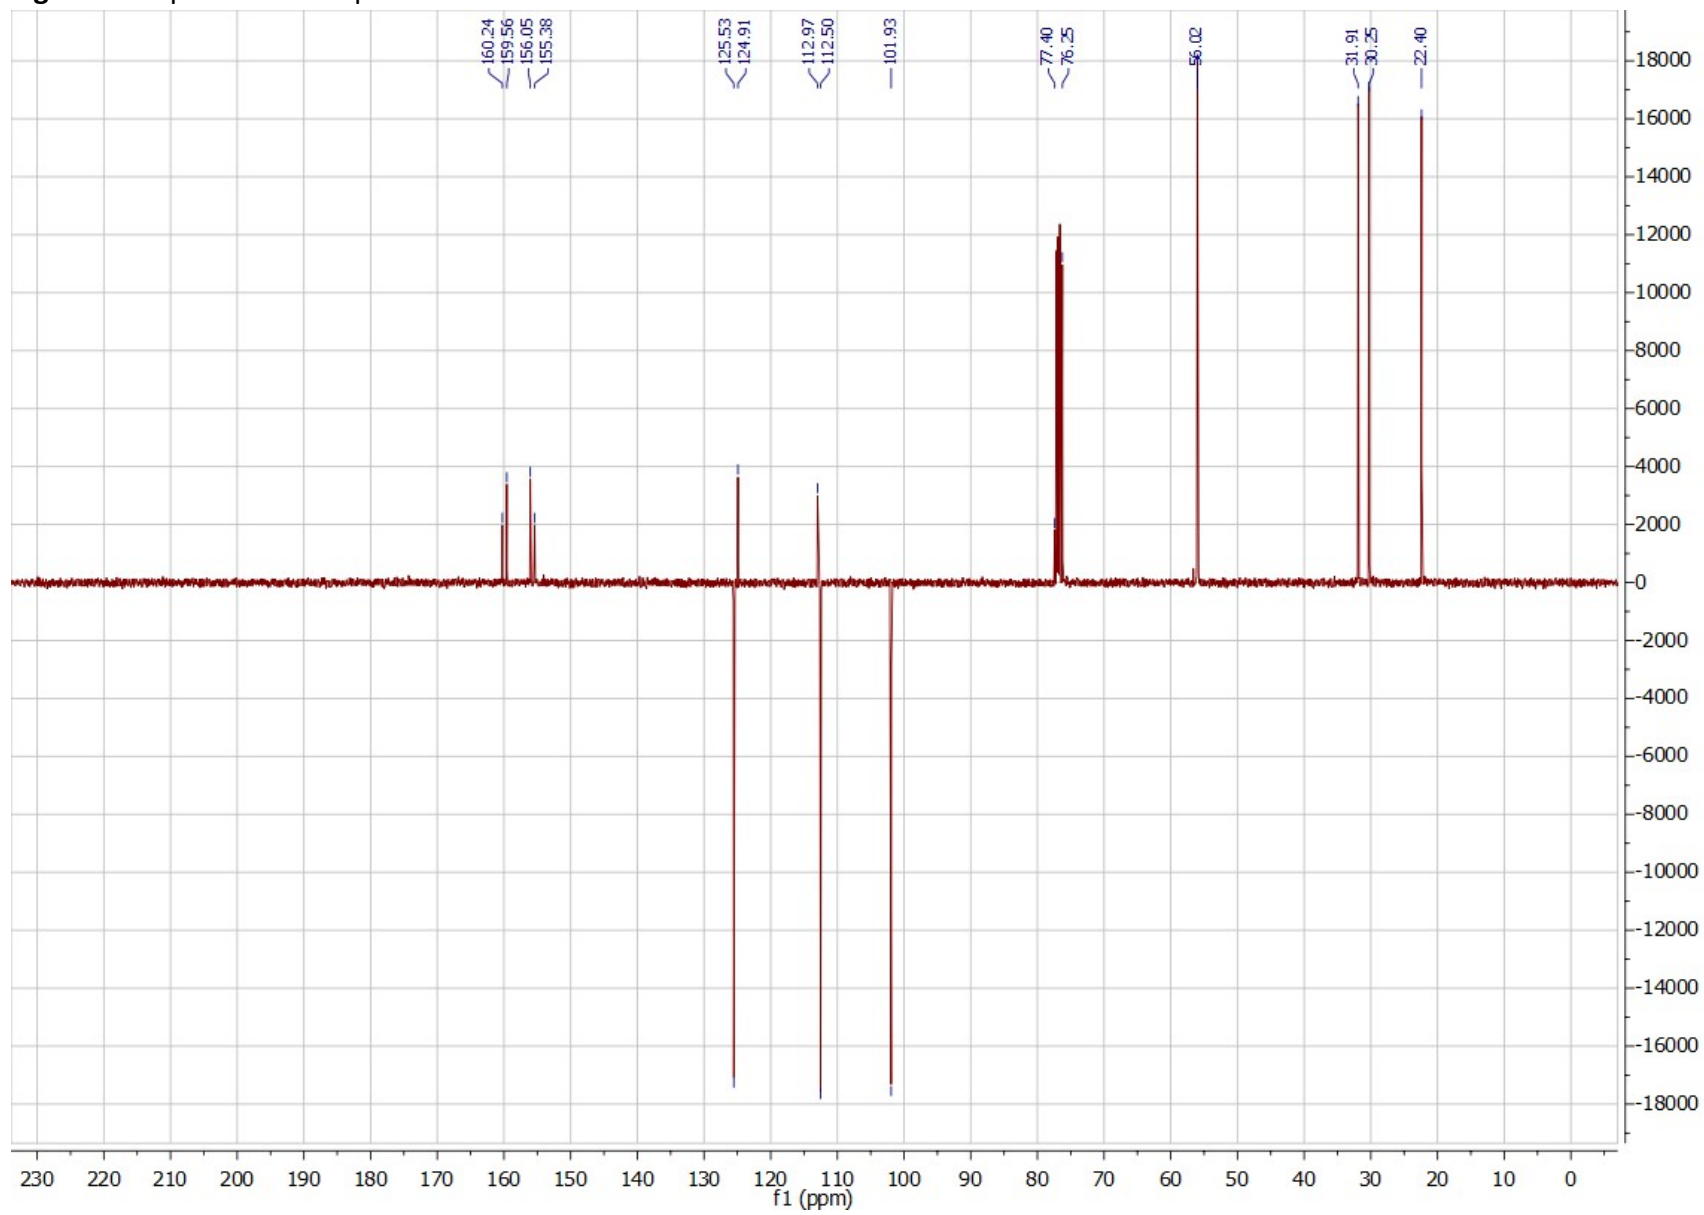

Fig. S3. <sup>1</sup>H spectra of Compound 10

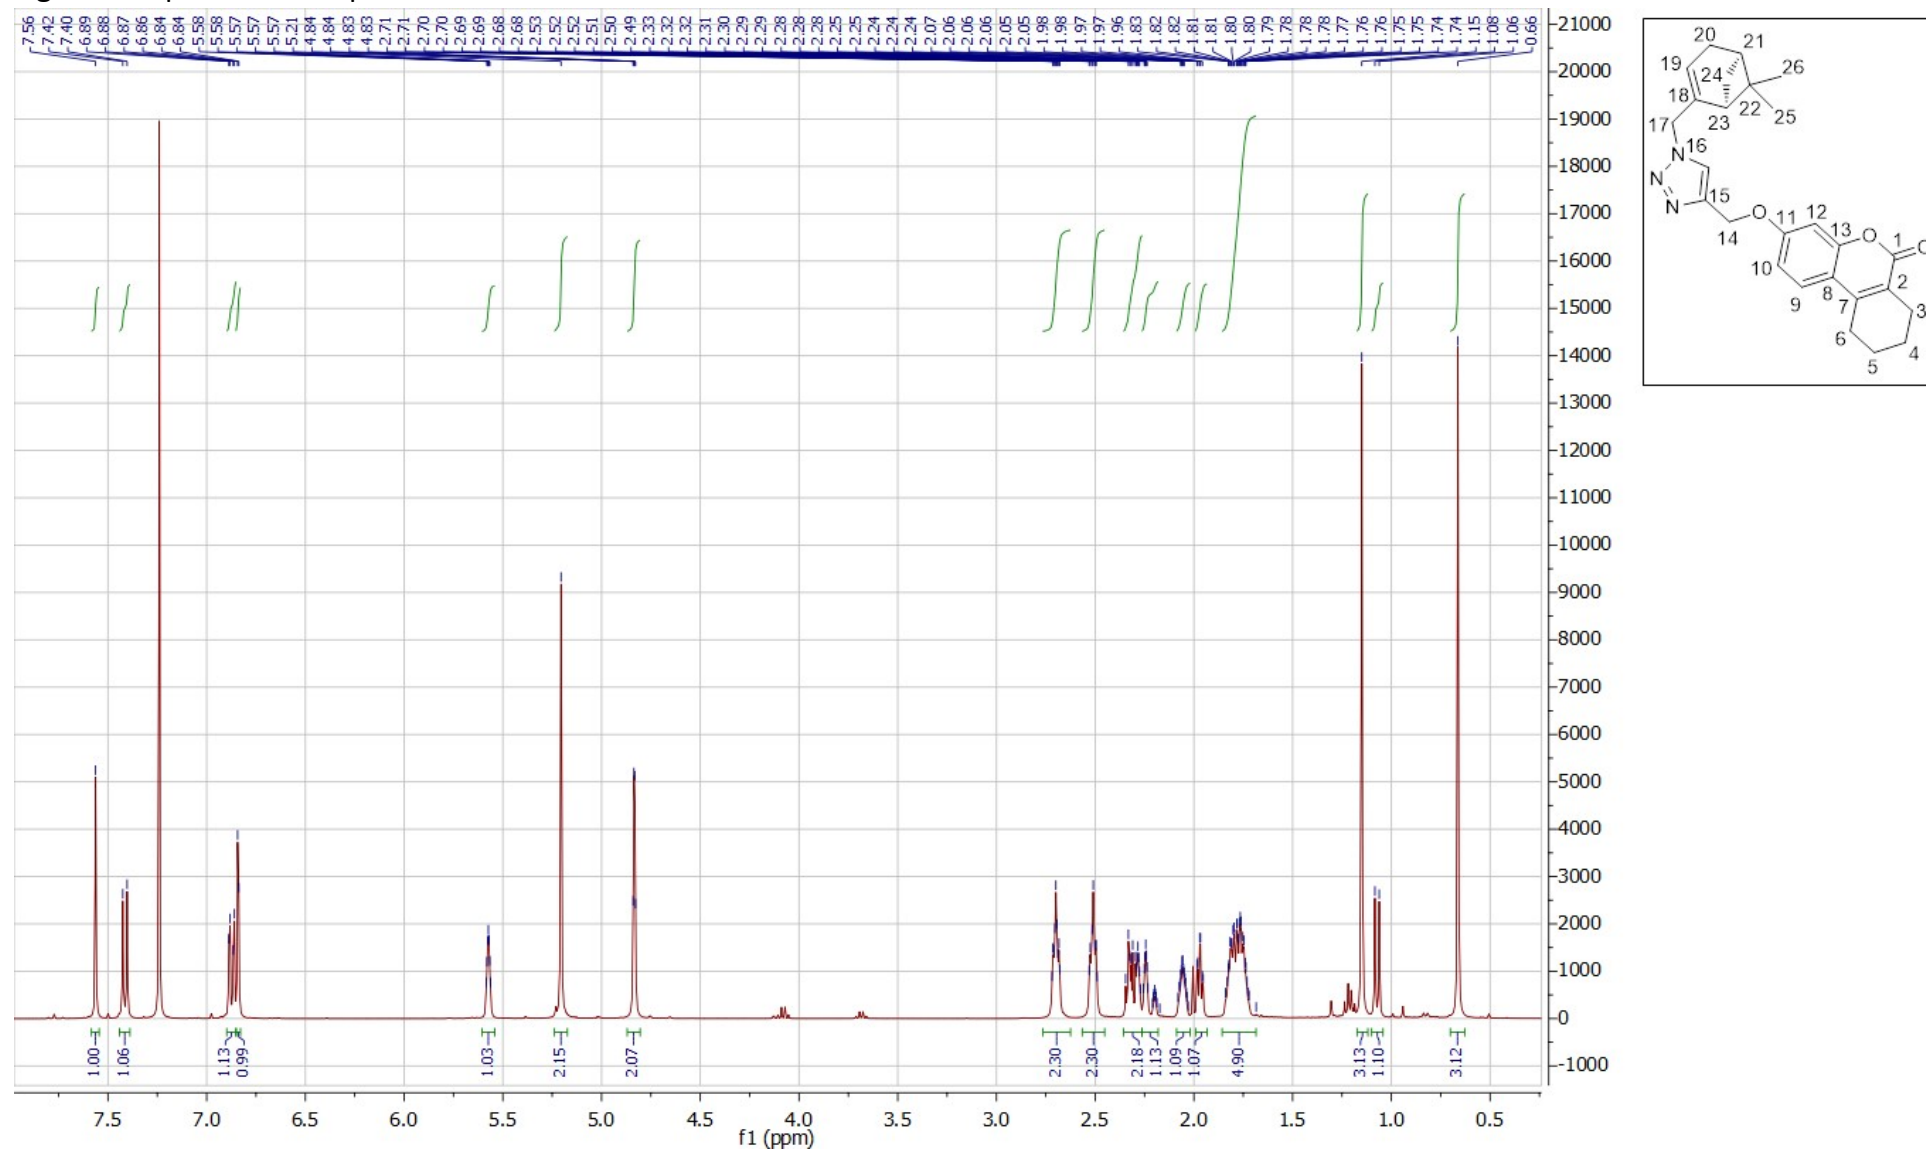



Fig. S4.  $^{13}\text{C}$  spectra of Compound 10.

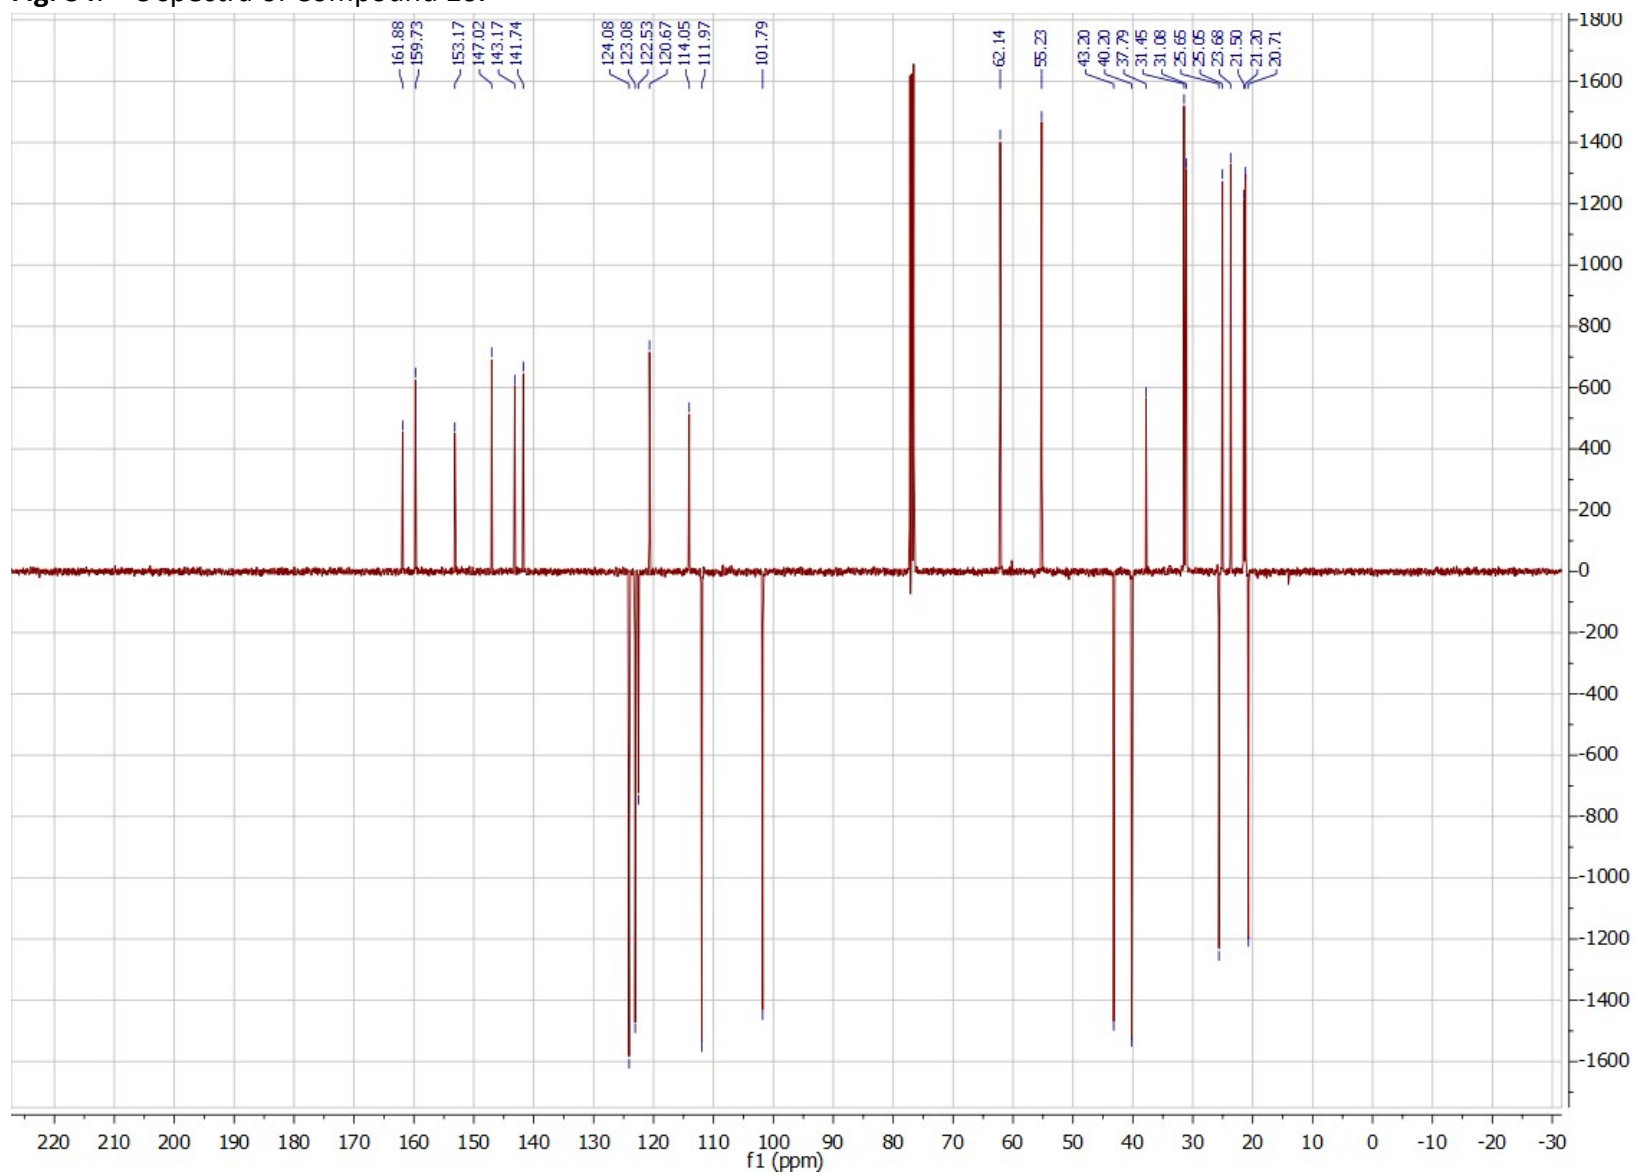

Fig. S5. <sup>1</sup>H spectra of Compound 38

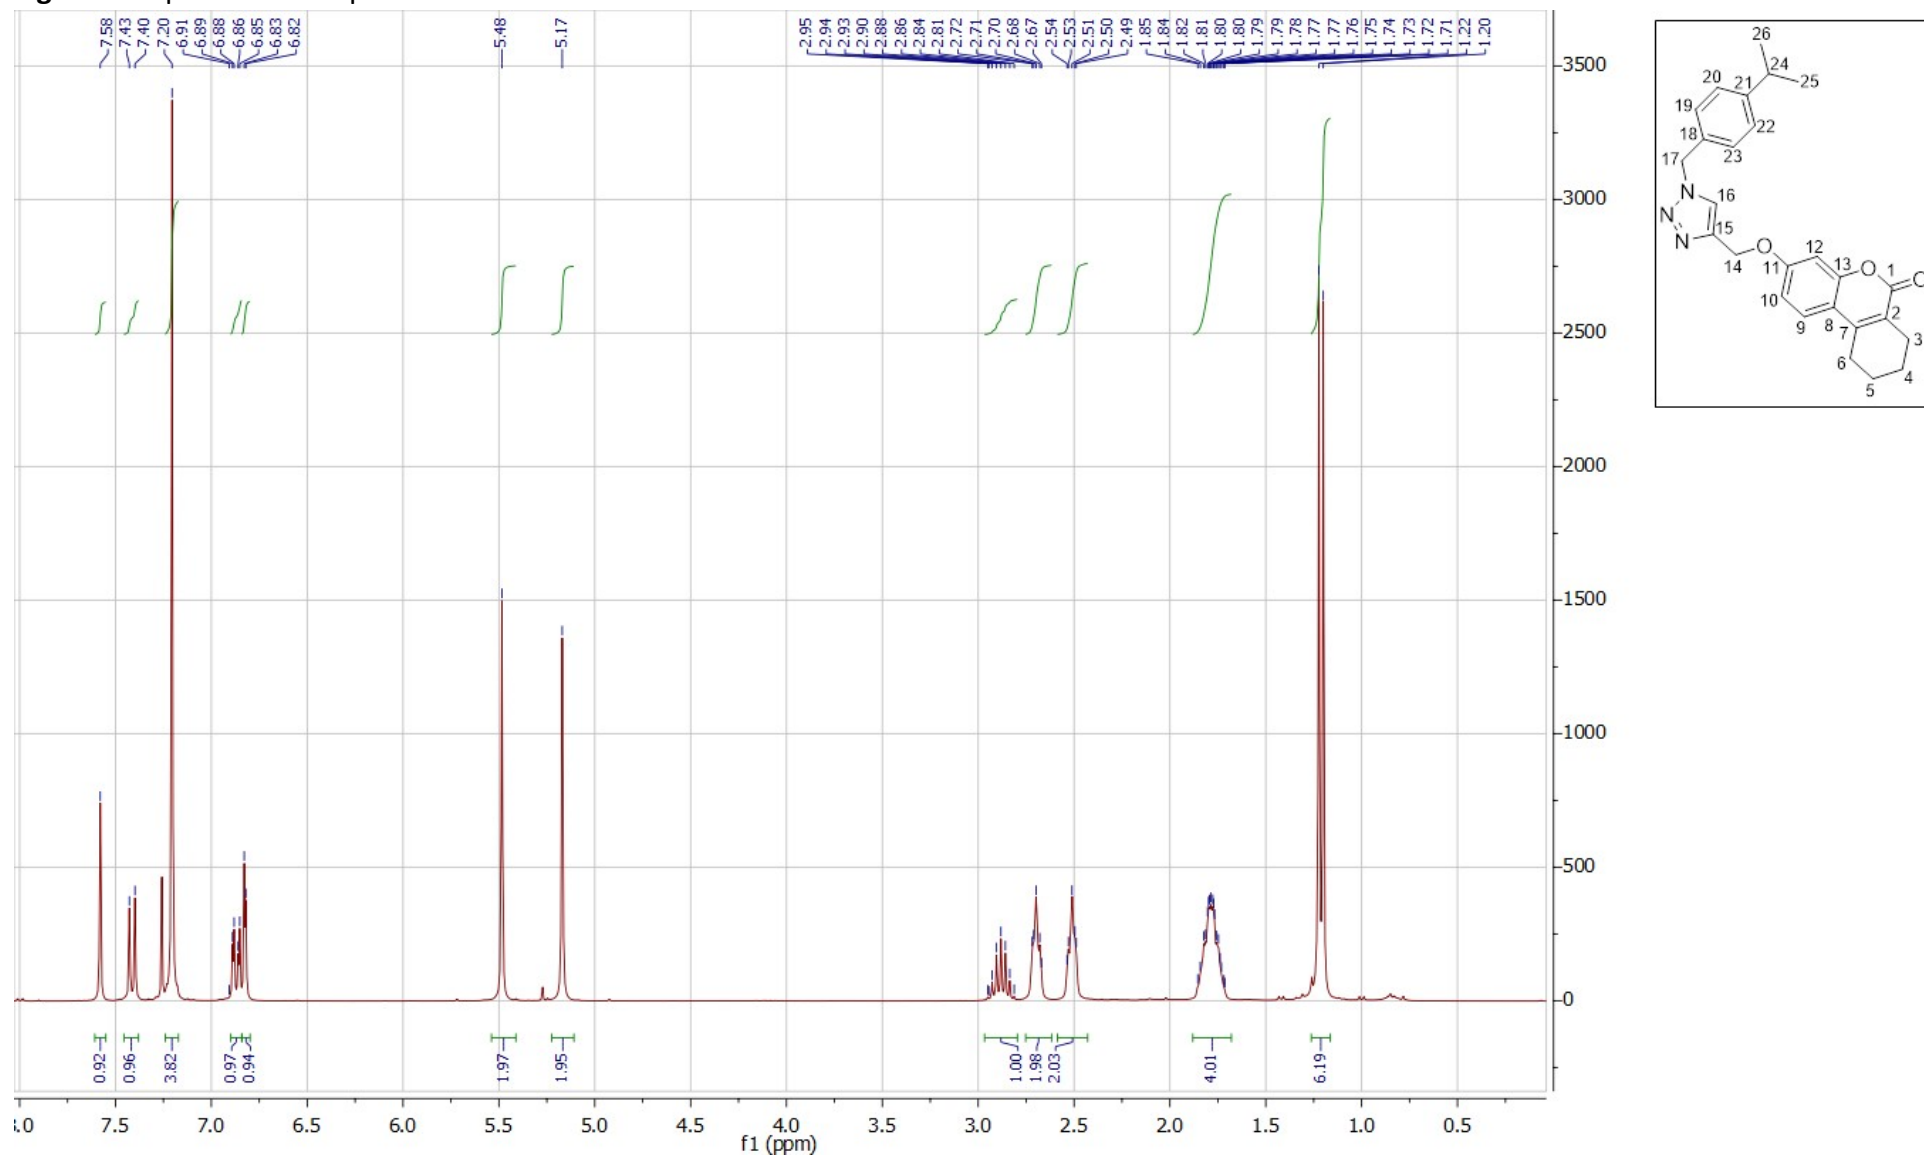

**Fig. S6.**  $^{13}\text{C}$  spectra of Compound **38**

lfav-do-cyc16.137.fid  
CYC 16; CDCl<sub>3</sub>/dhd3

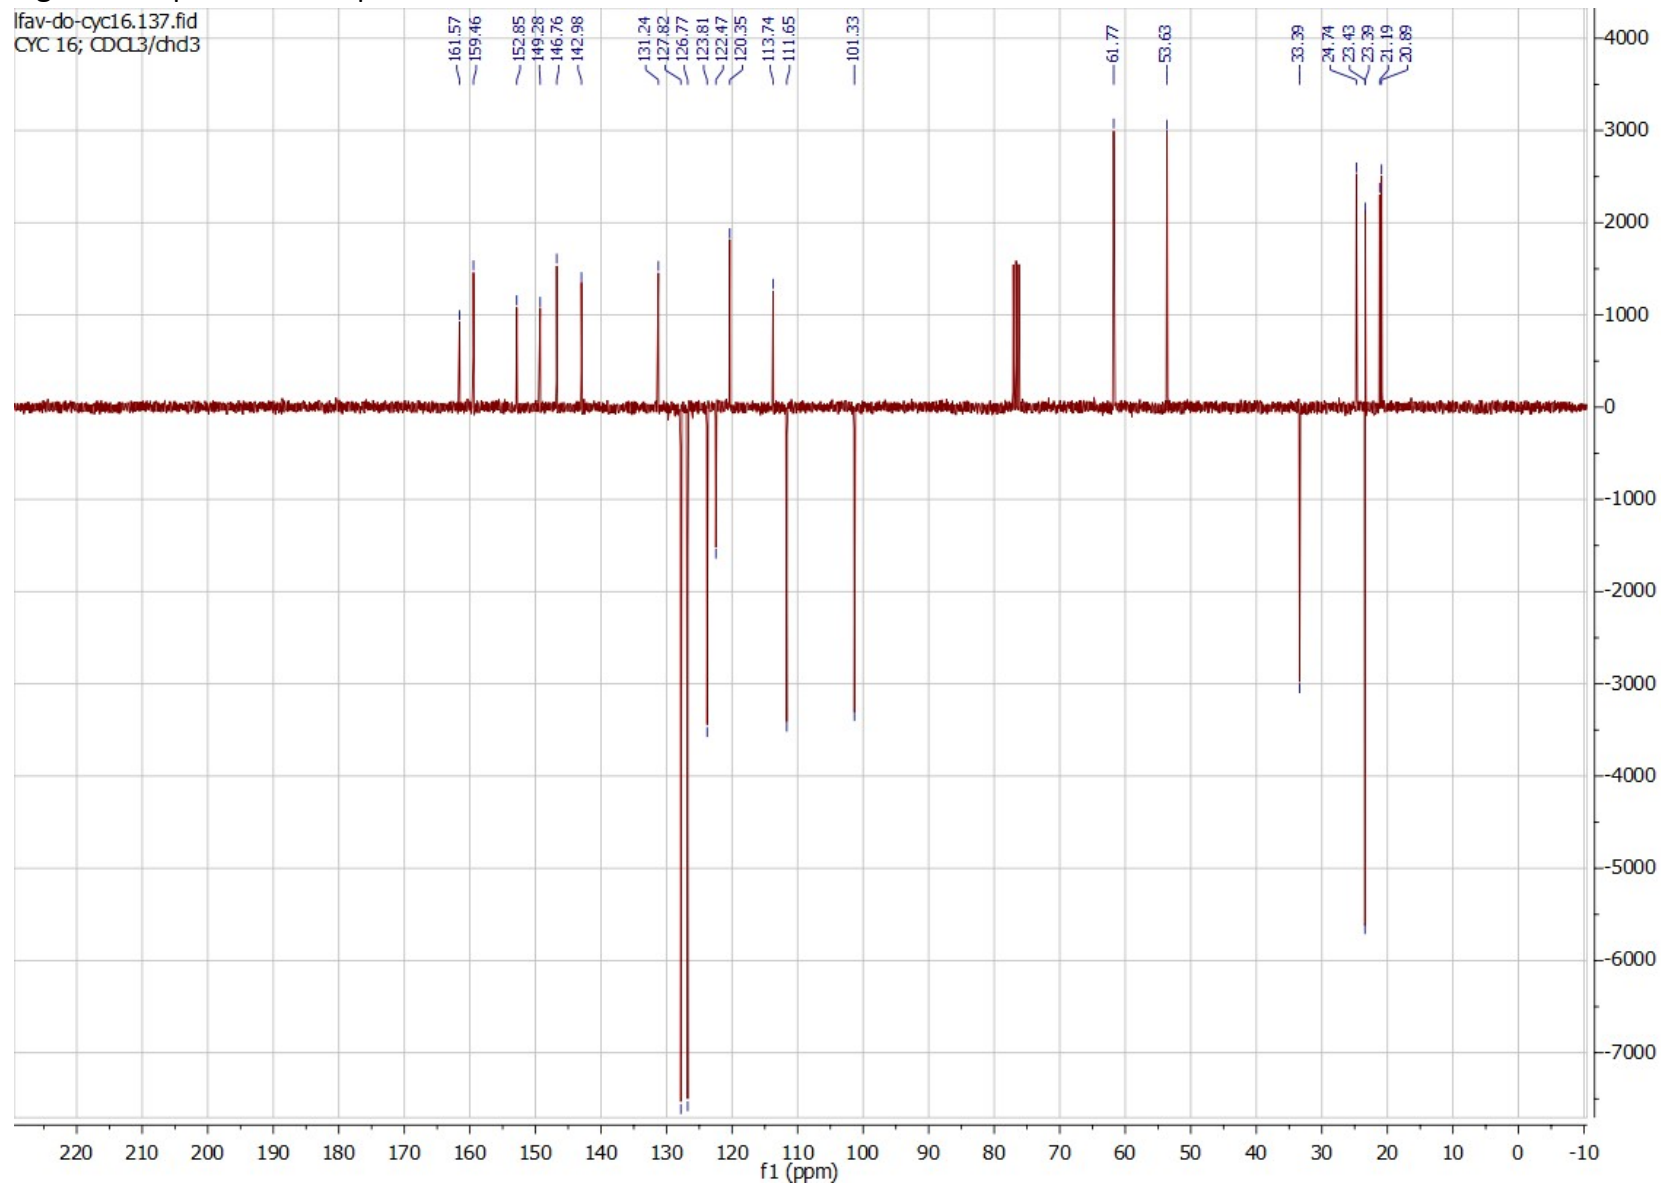

Fig. S7. <sup>1</sup>H spectra of Compound 39

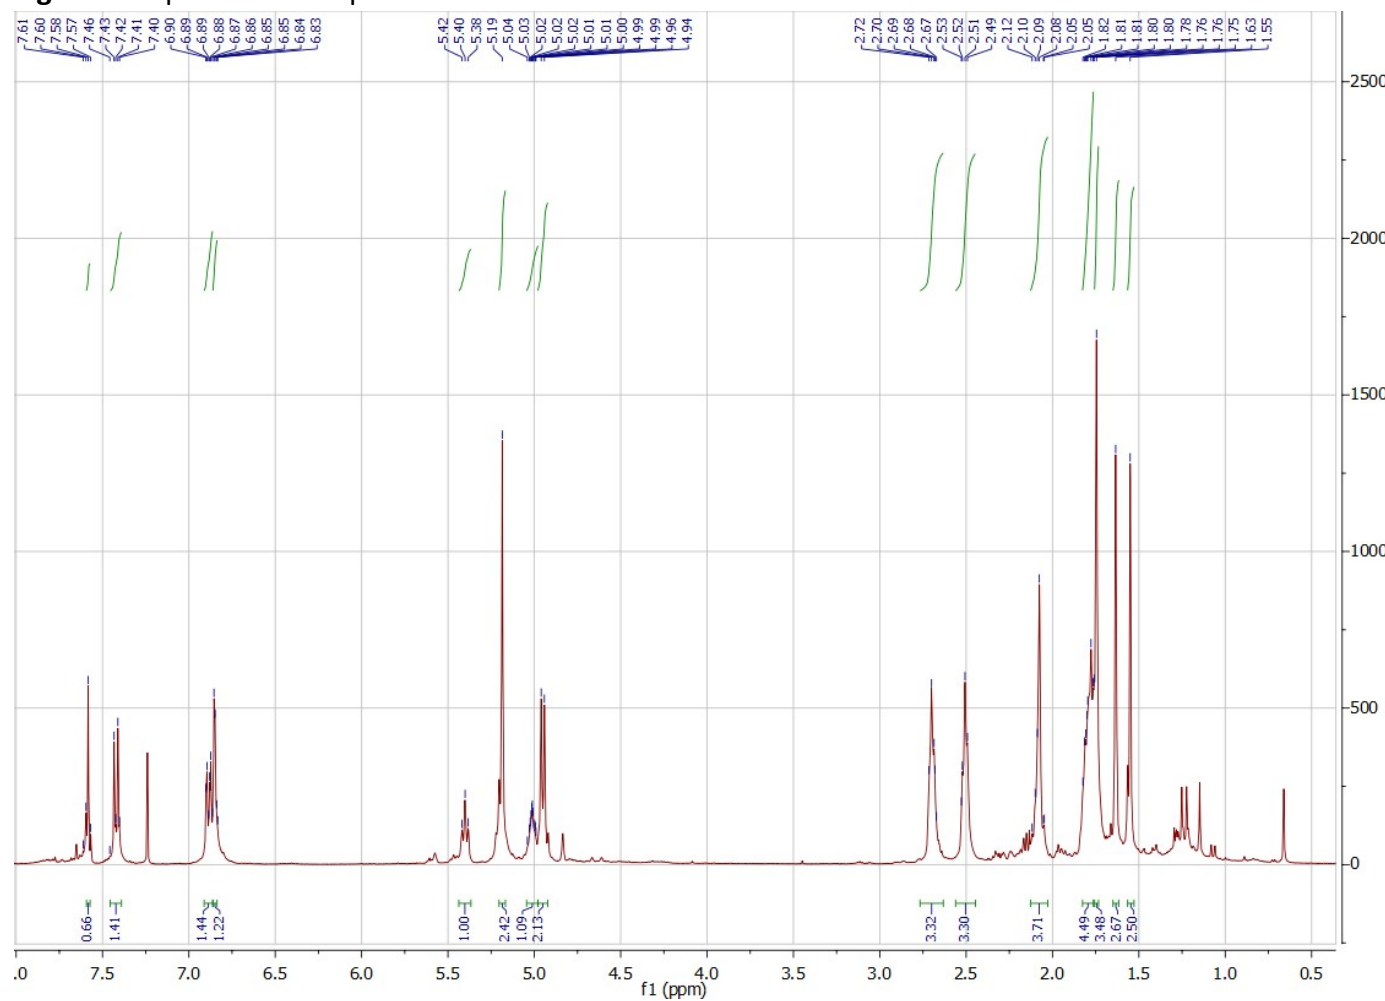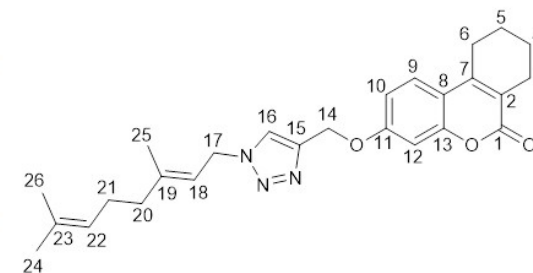

Fig. S8.  $^{13}\text{C}$  spectra of Compound 39

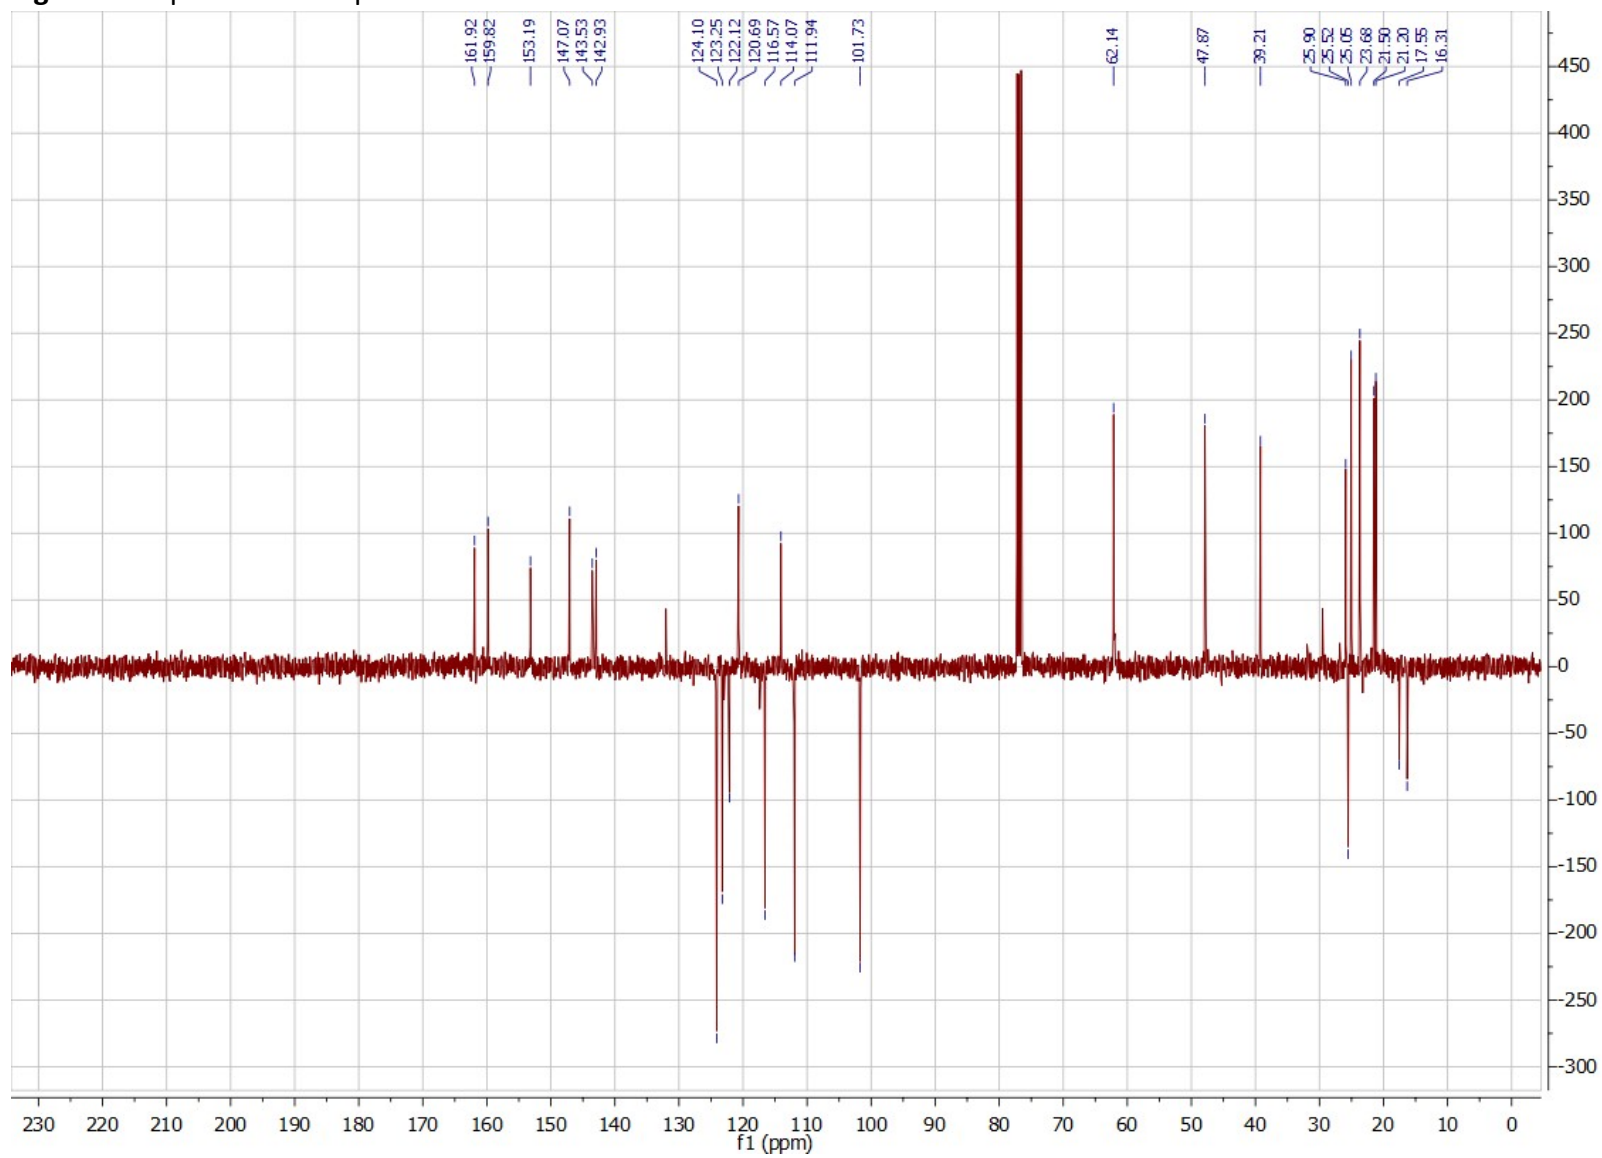

Fig. S9. <sup>1</sup>H spectra of Compound 40

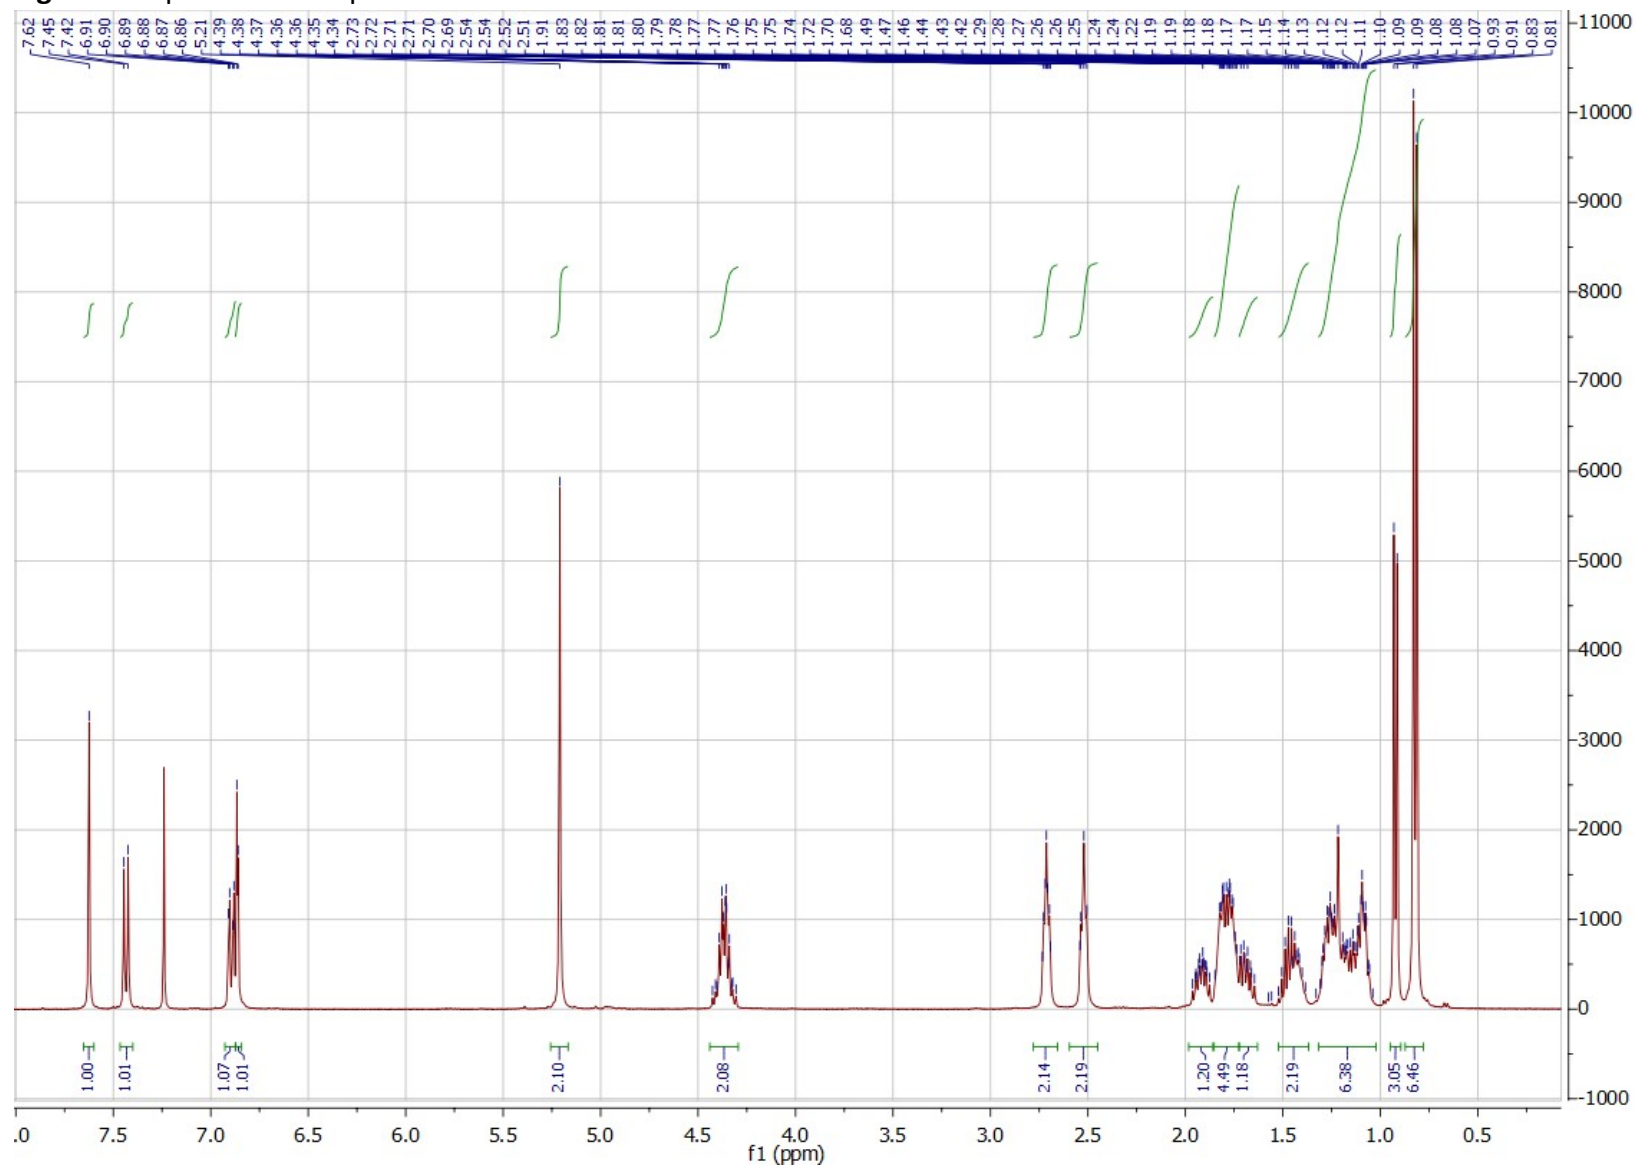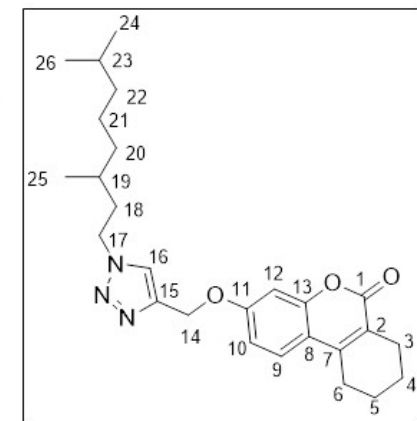

Fig. S10.  $^{13}\text{C}$  spectra of Compound 40

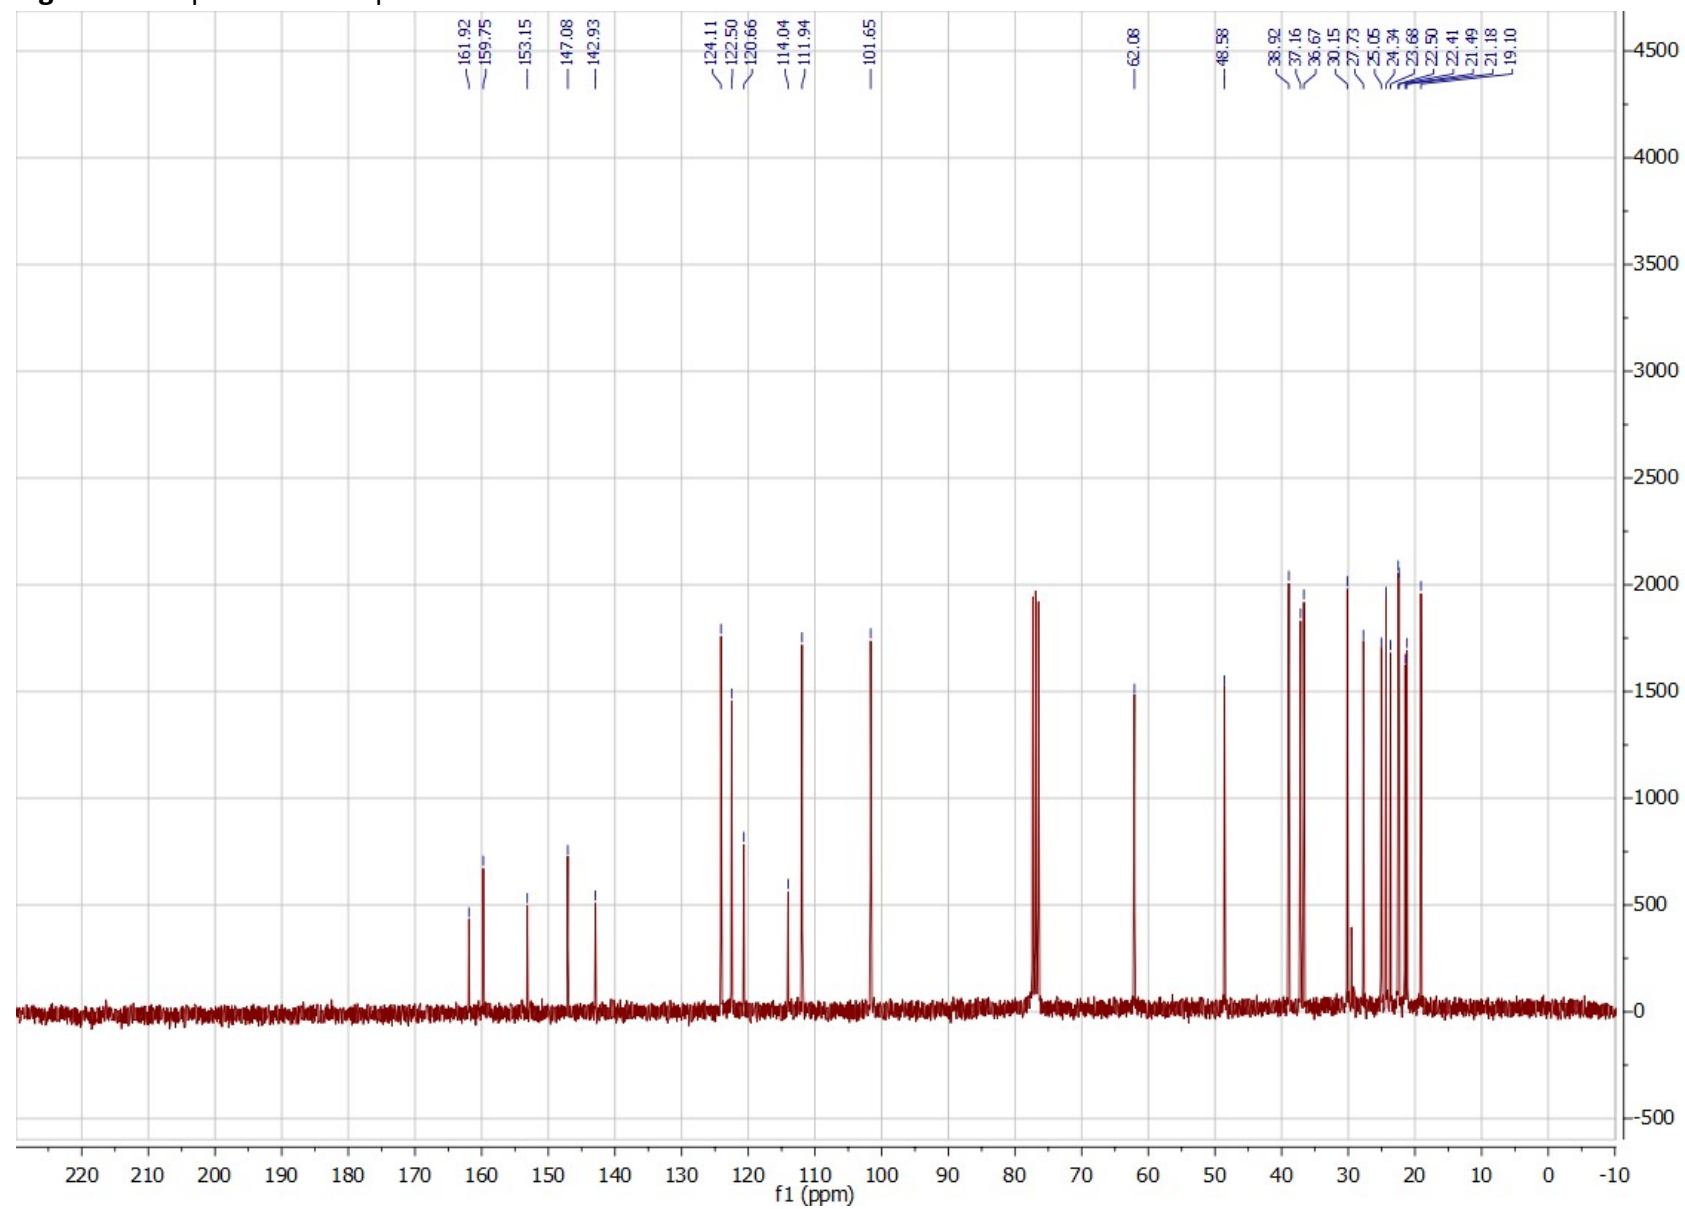

Fig. S11. <sup>1</sup>H spectra of Compound 41

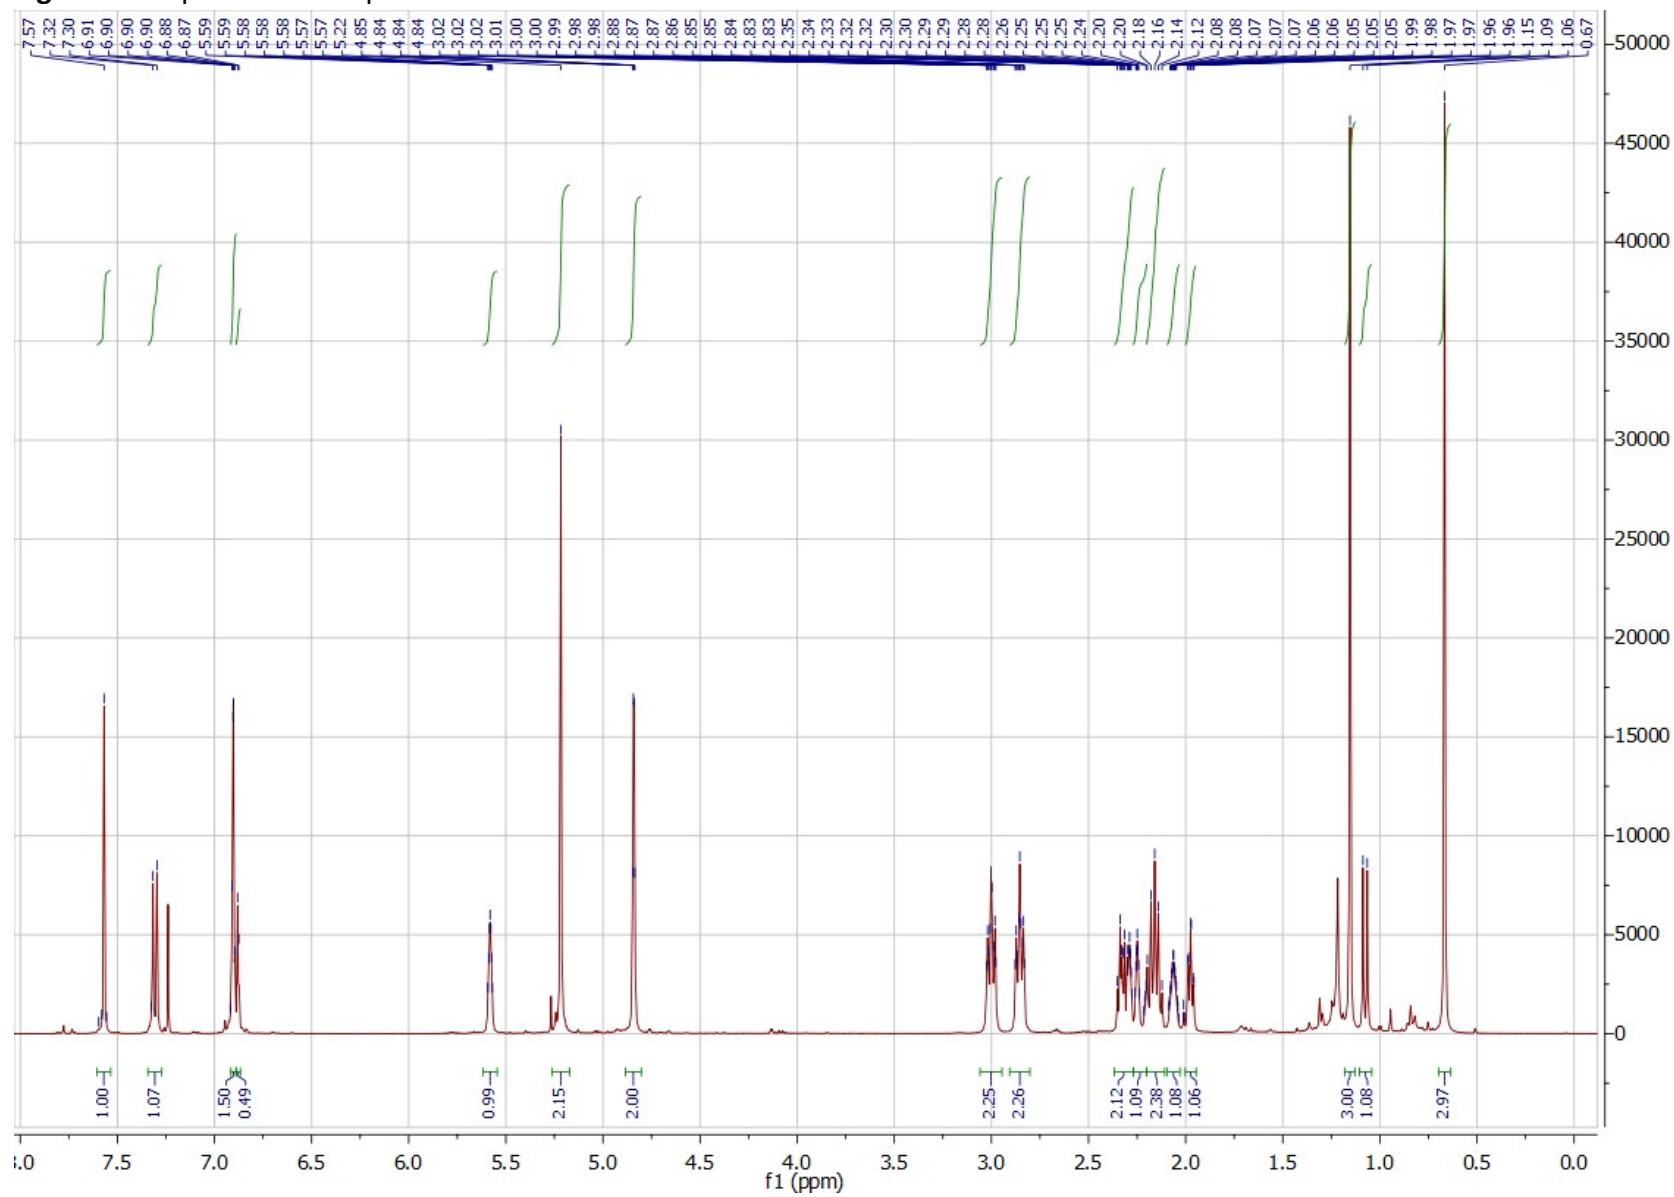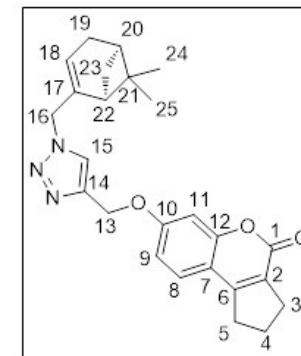



Fig. S12.  $^{13}\text{C}$  spectra of Compound 41

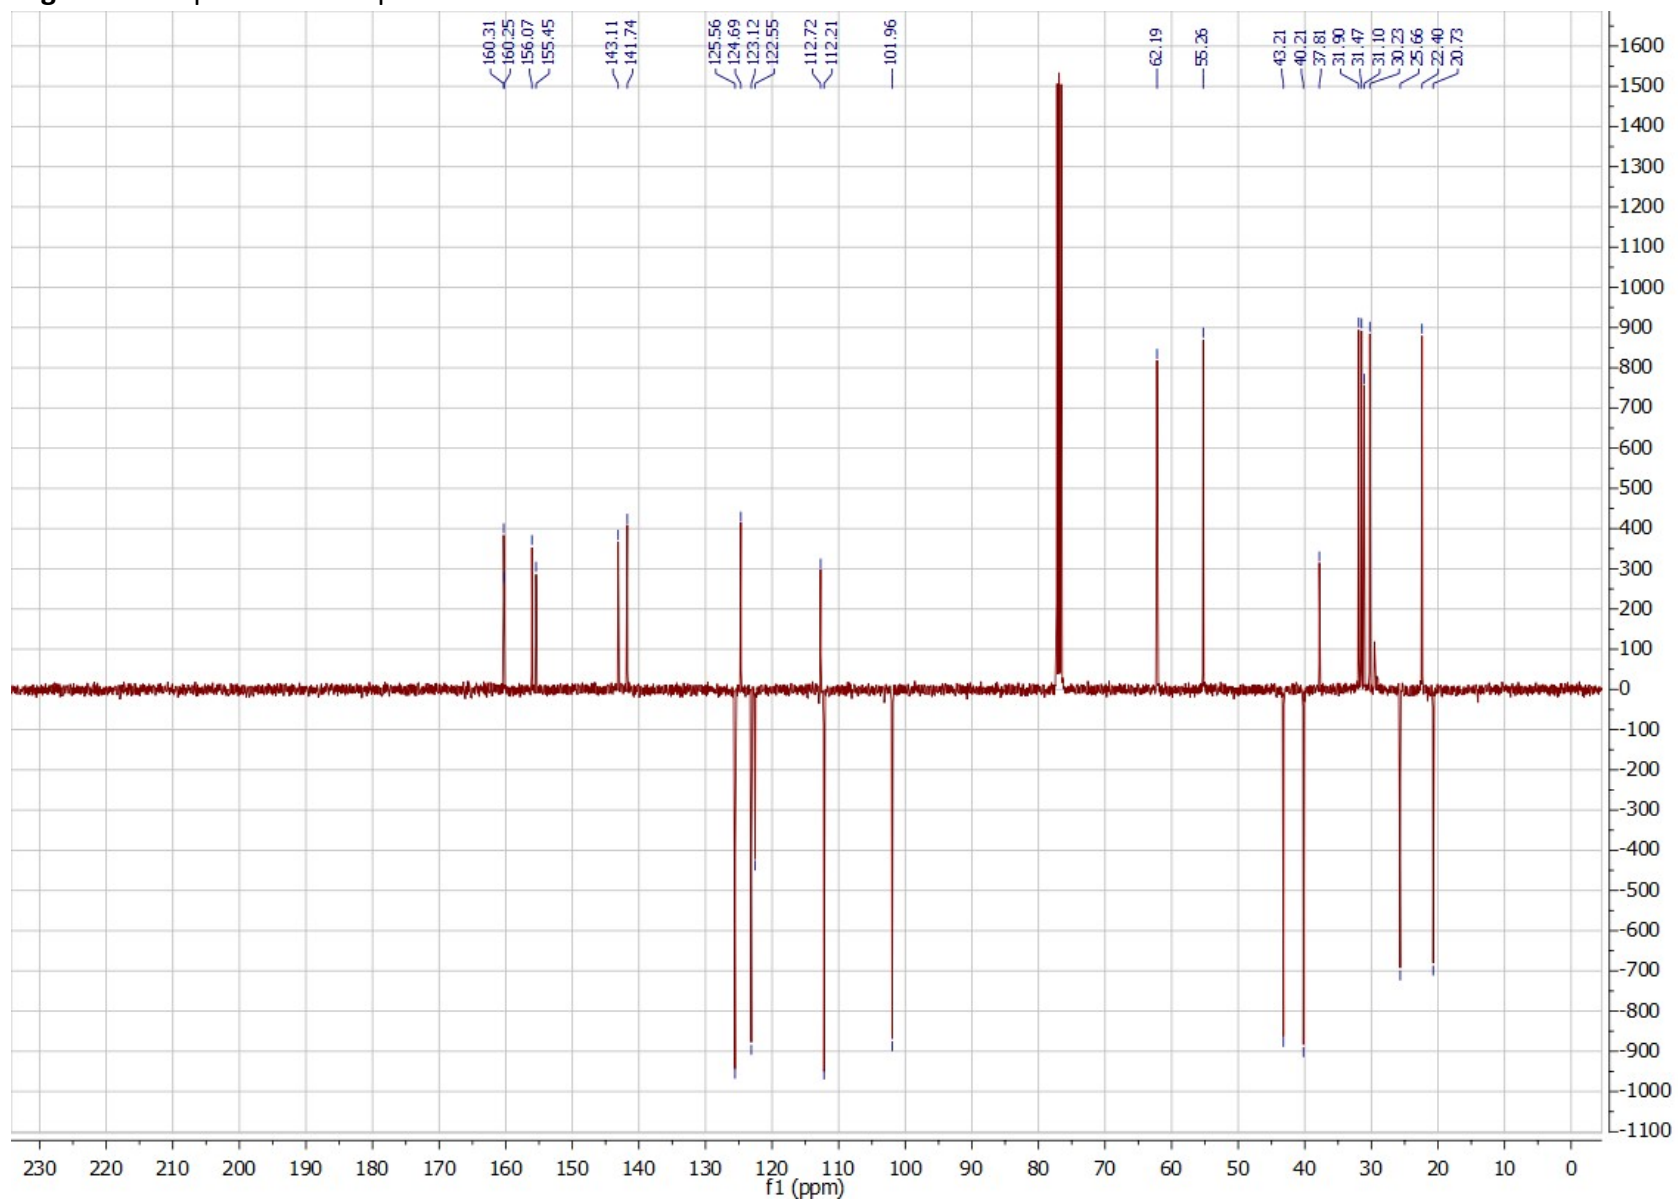

Fig. S13. <sup>1</sup>H spectra of Compound 43

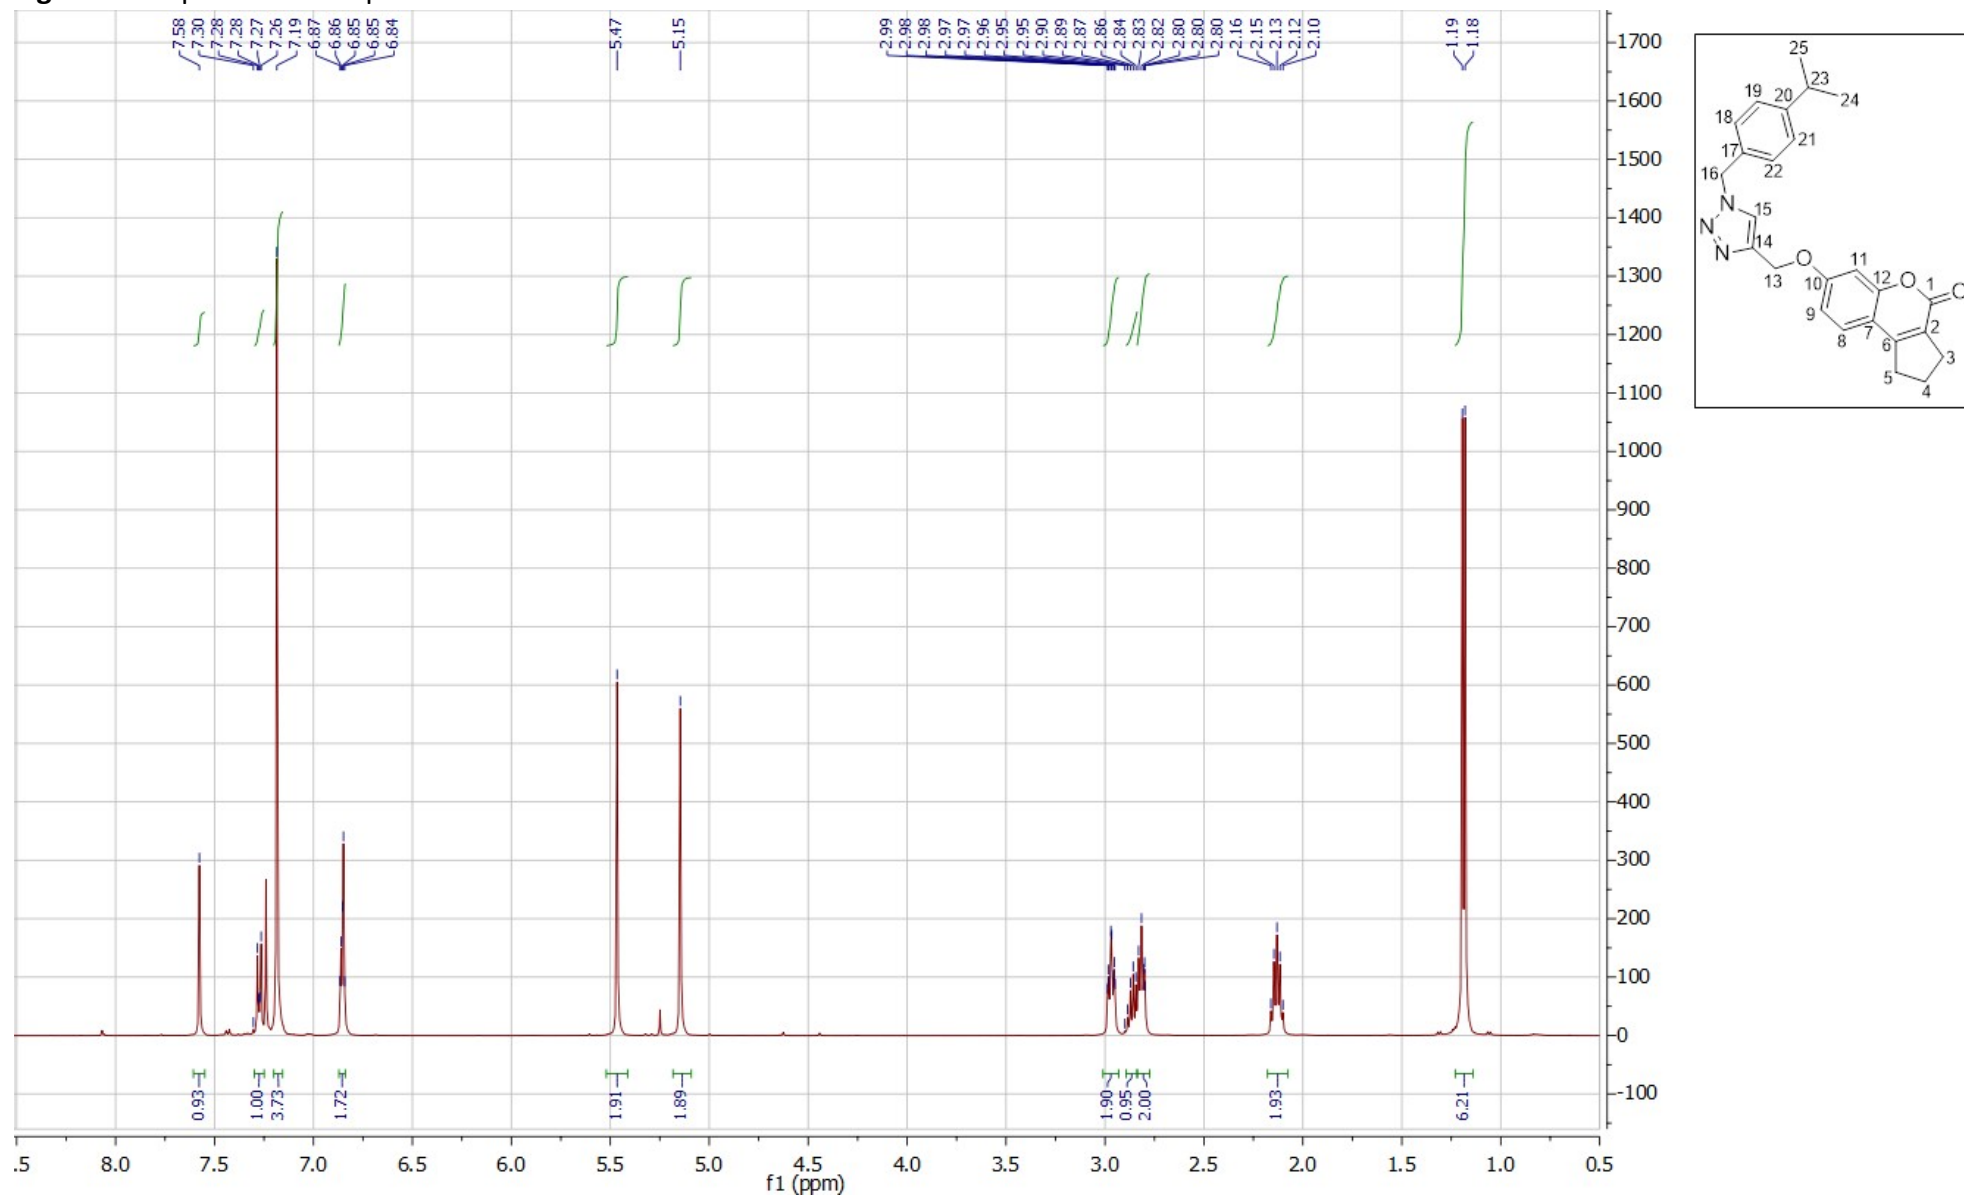

**Fig. S14.**  $^1\text{H}$  spectra of Compound **43**

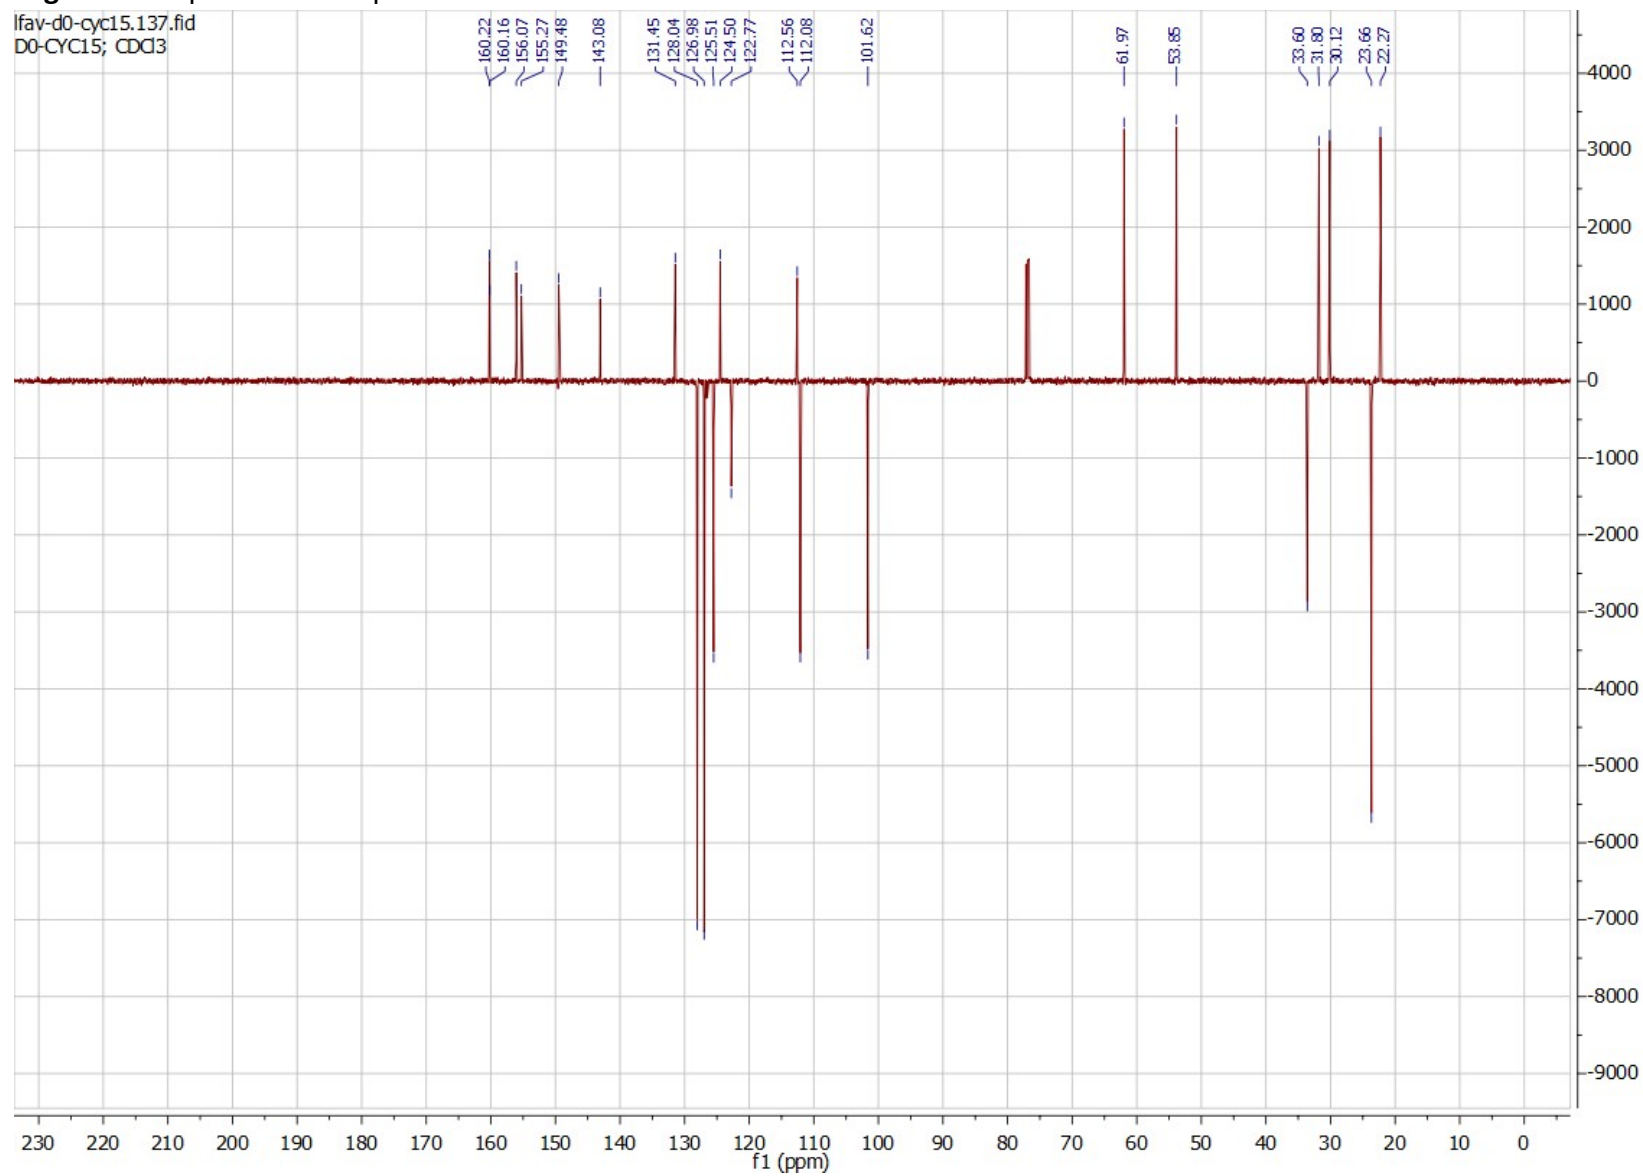

Fig. S15. <sup>1</sup>H spectra of Compound 44

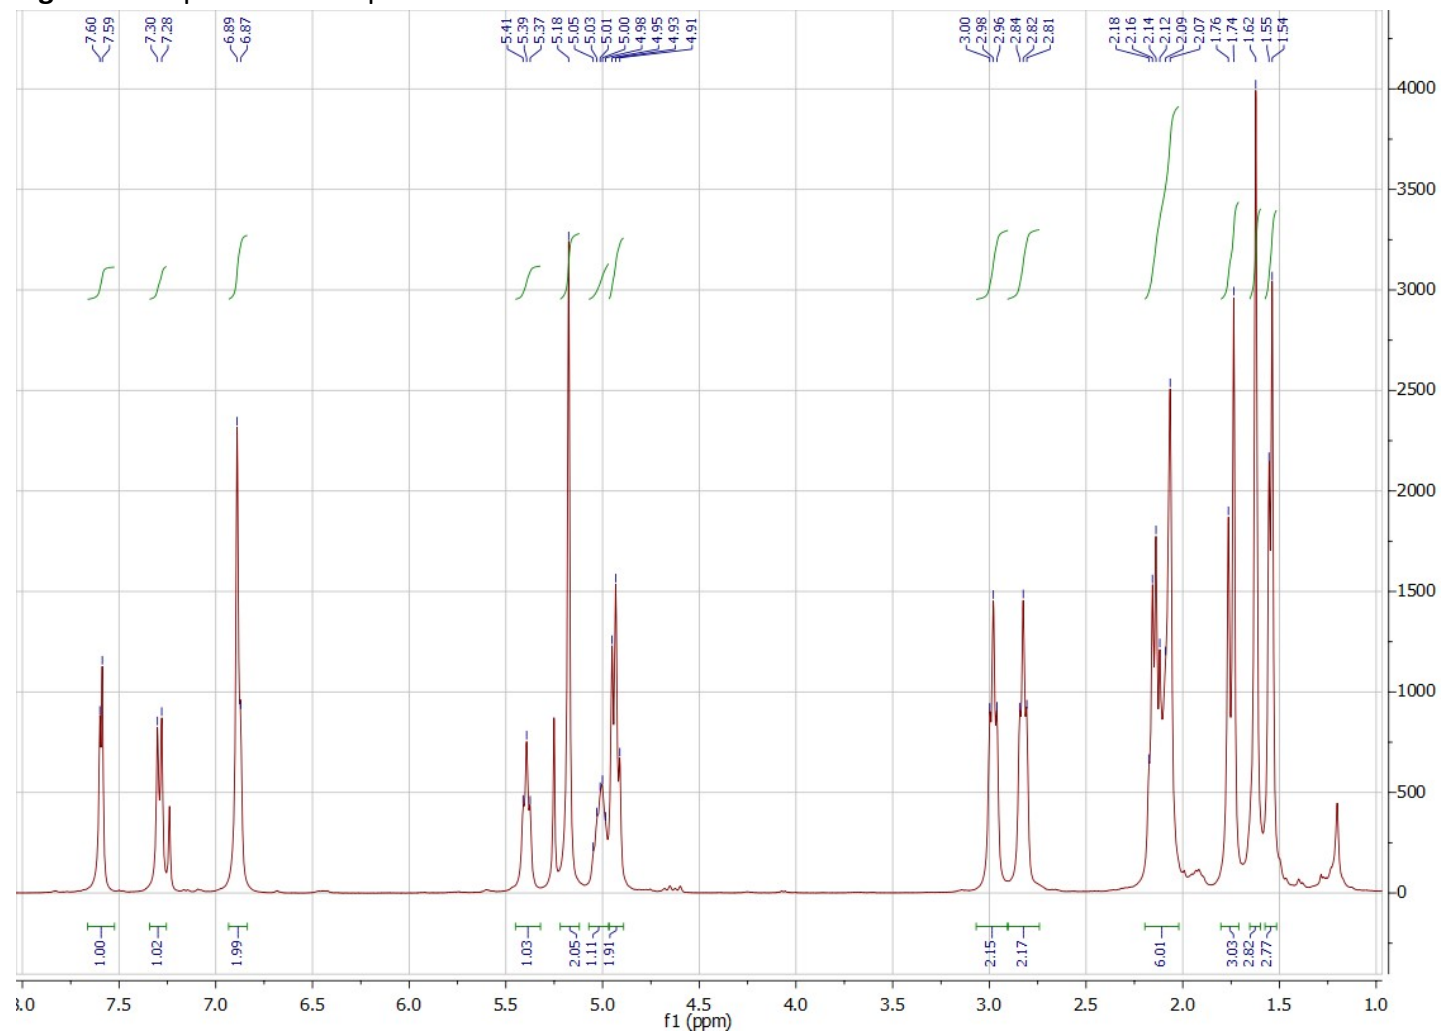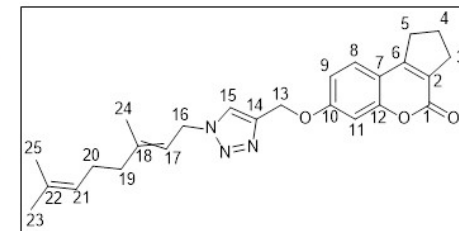

Fig. S16.  $^{13}\text{C}$  spectra of Compound 44

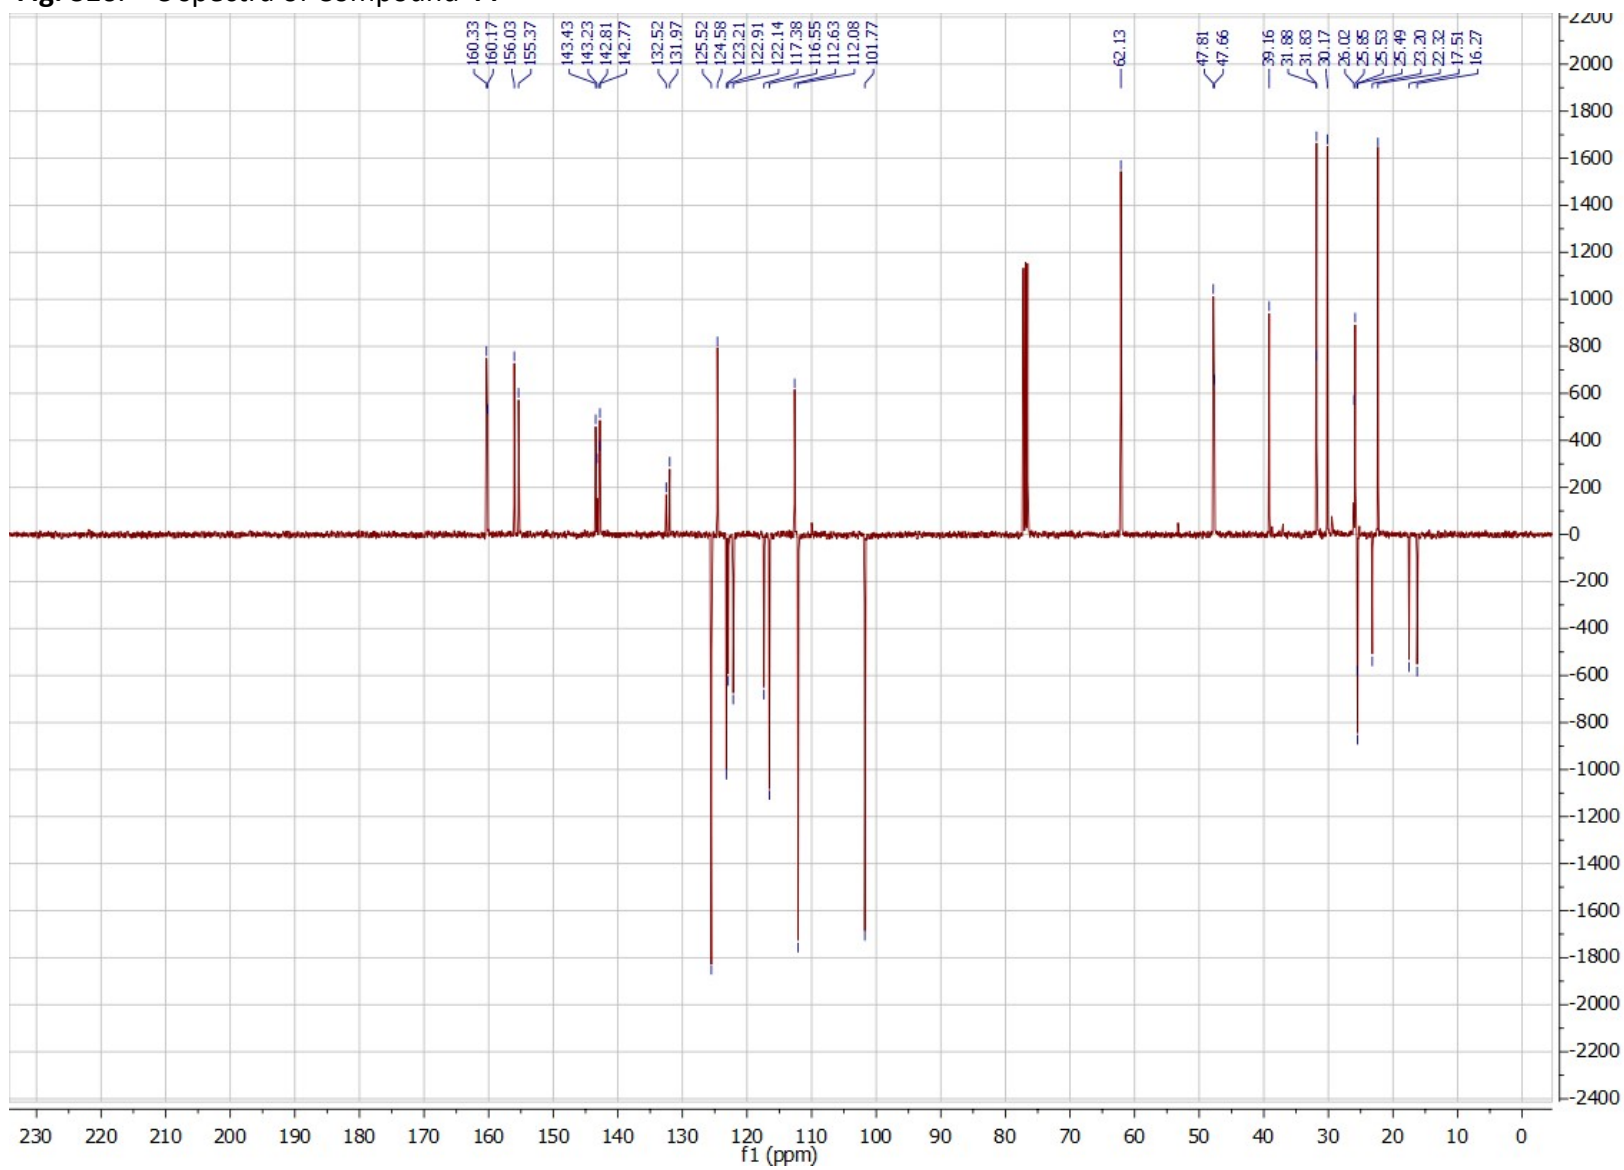

Fig. S17. <sup>1</sup>H spectra of Compound 45

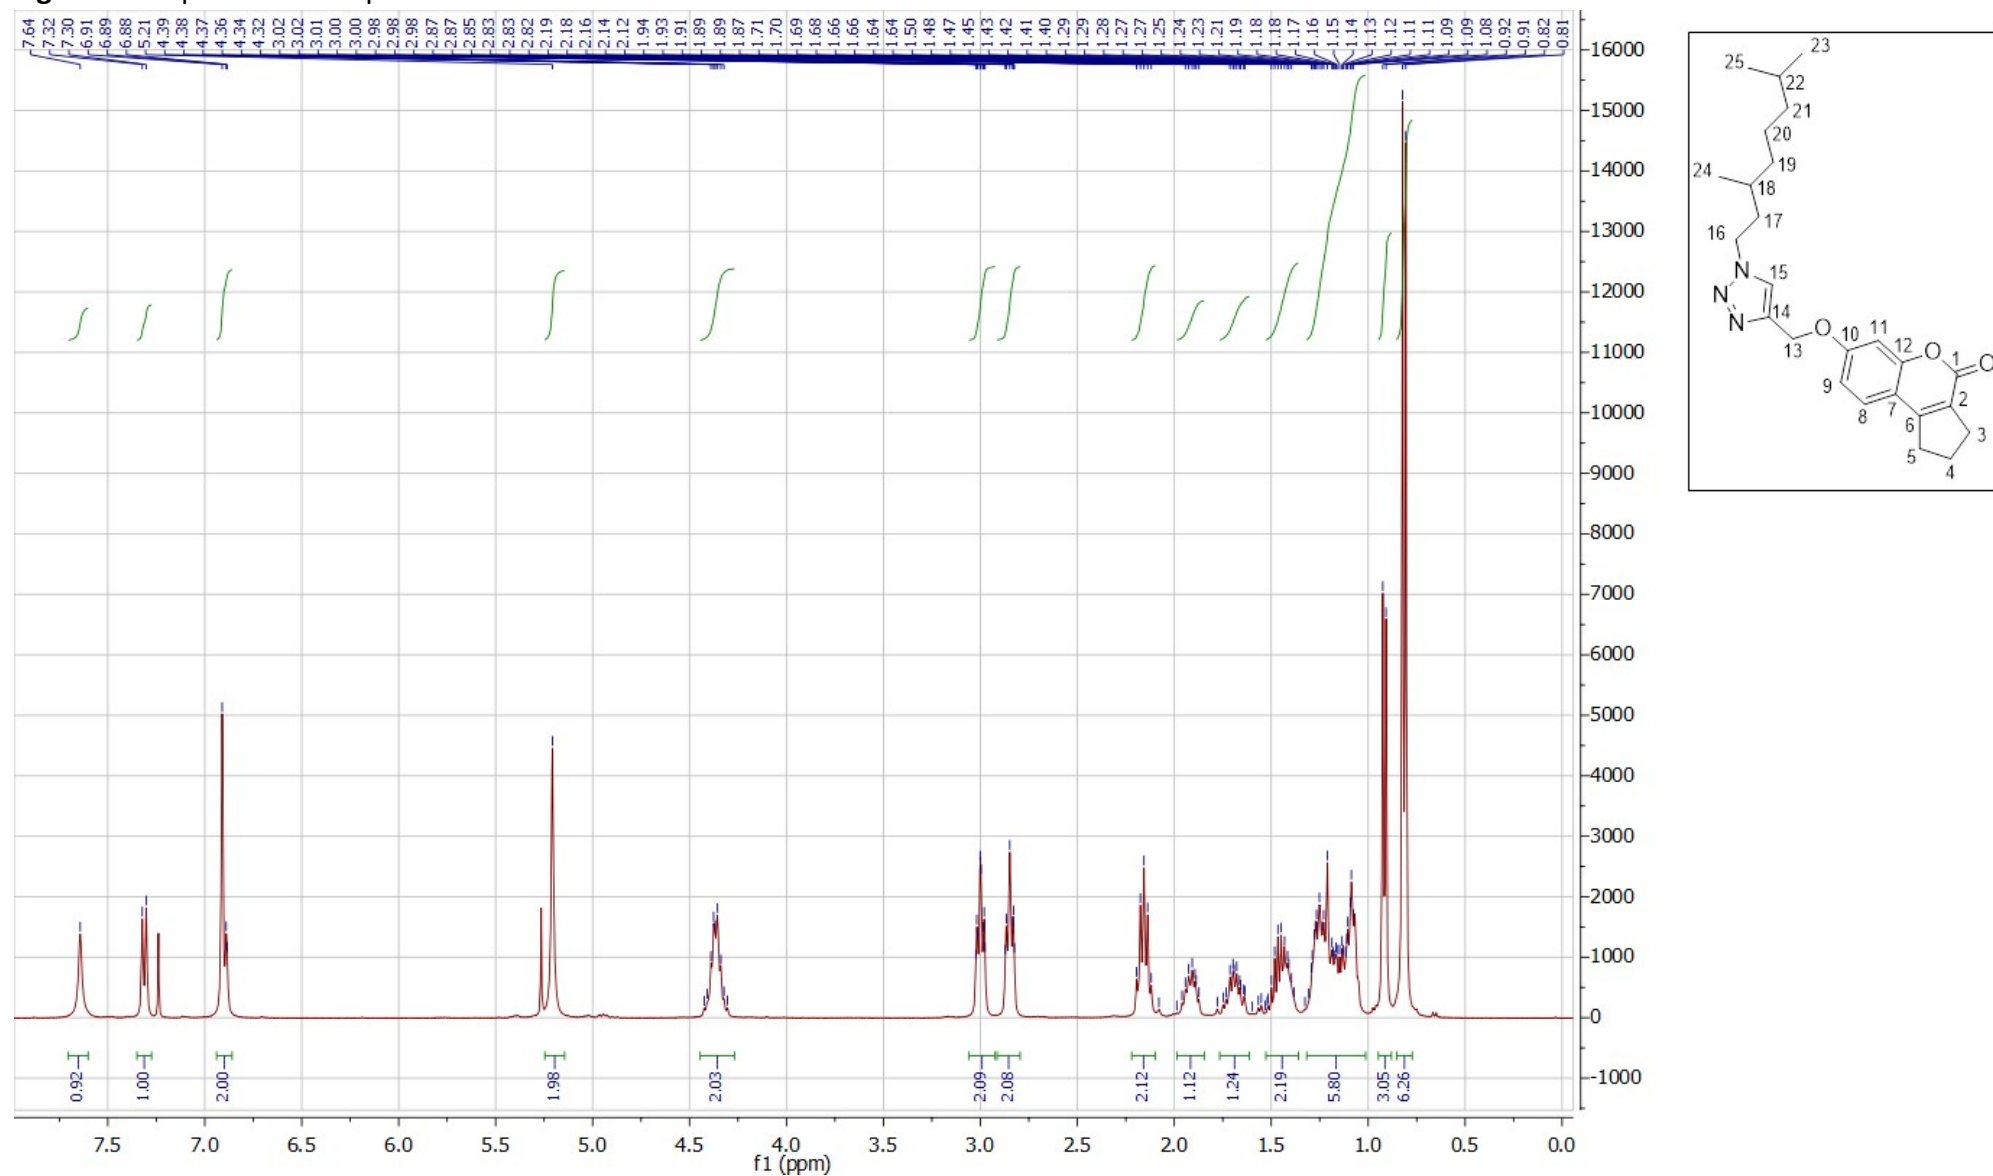

Fig. S18.  $^{13}\text{C}$  spectra of Compound 45

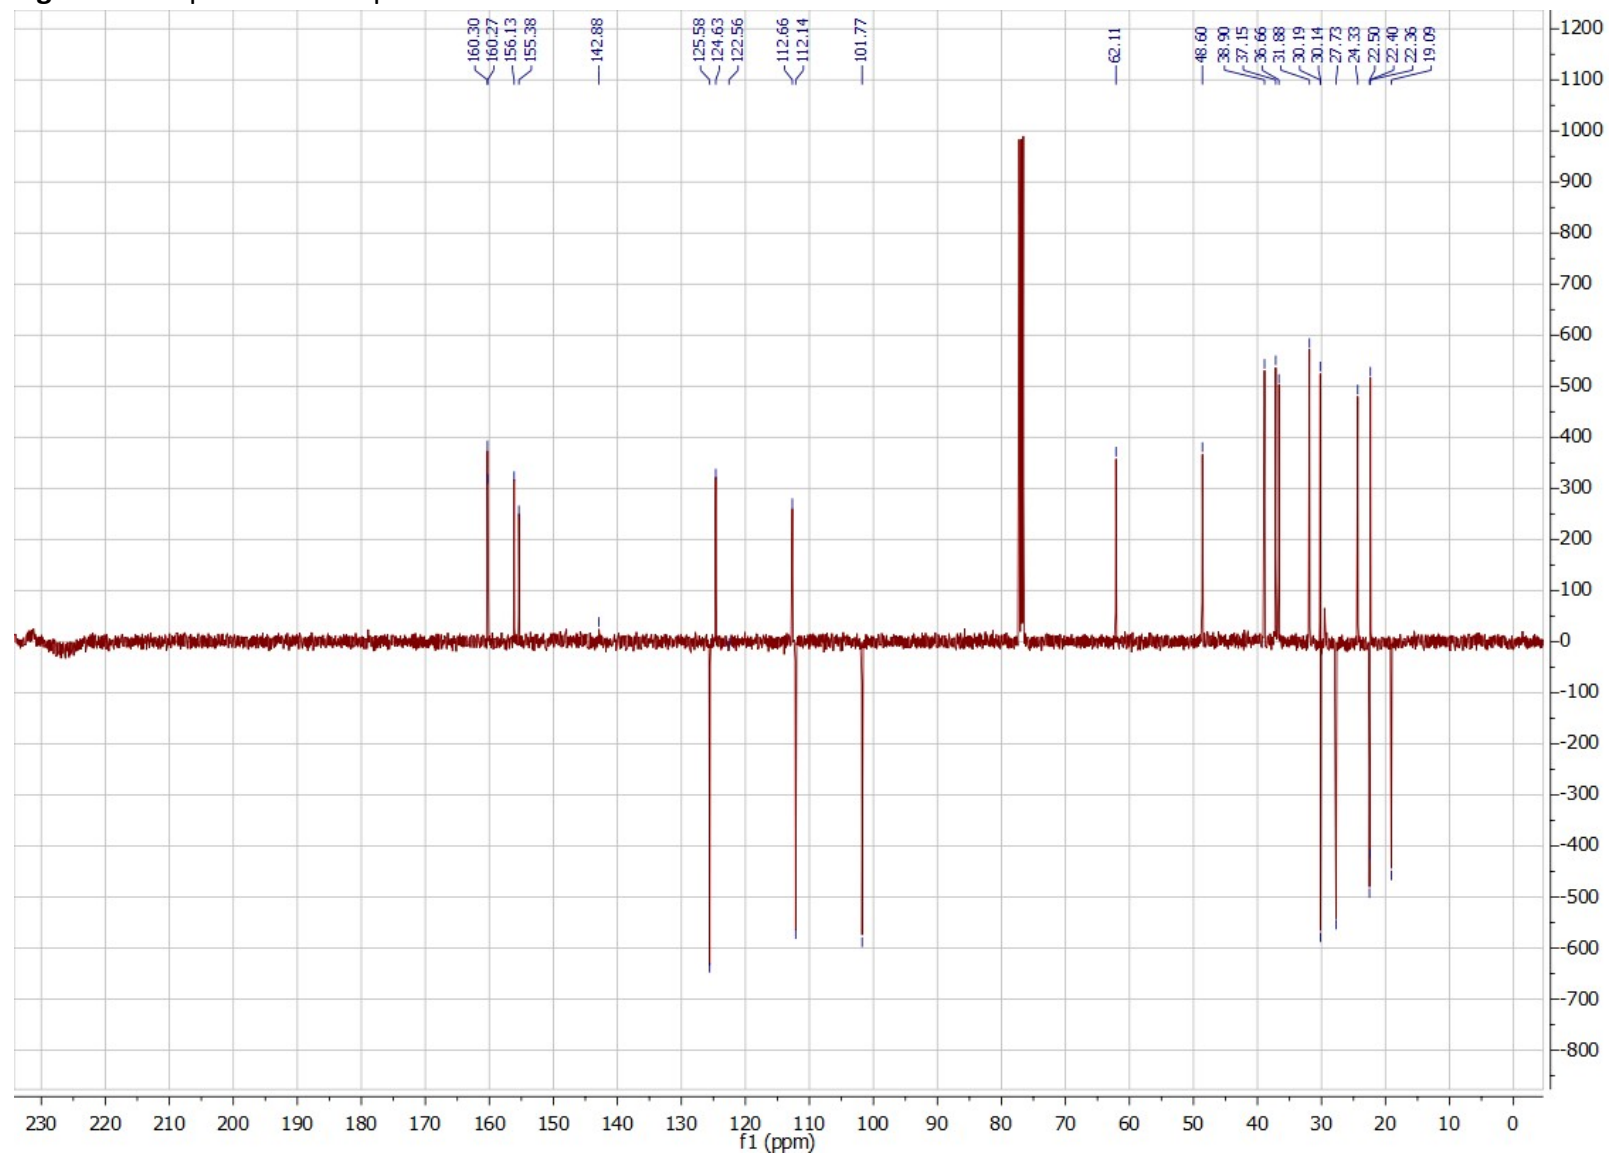







Fig. S20.  $^{13}\text{C}$  spectra of Compound 46

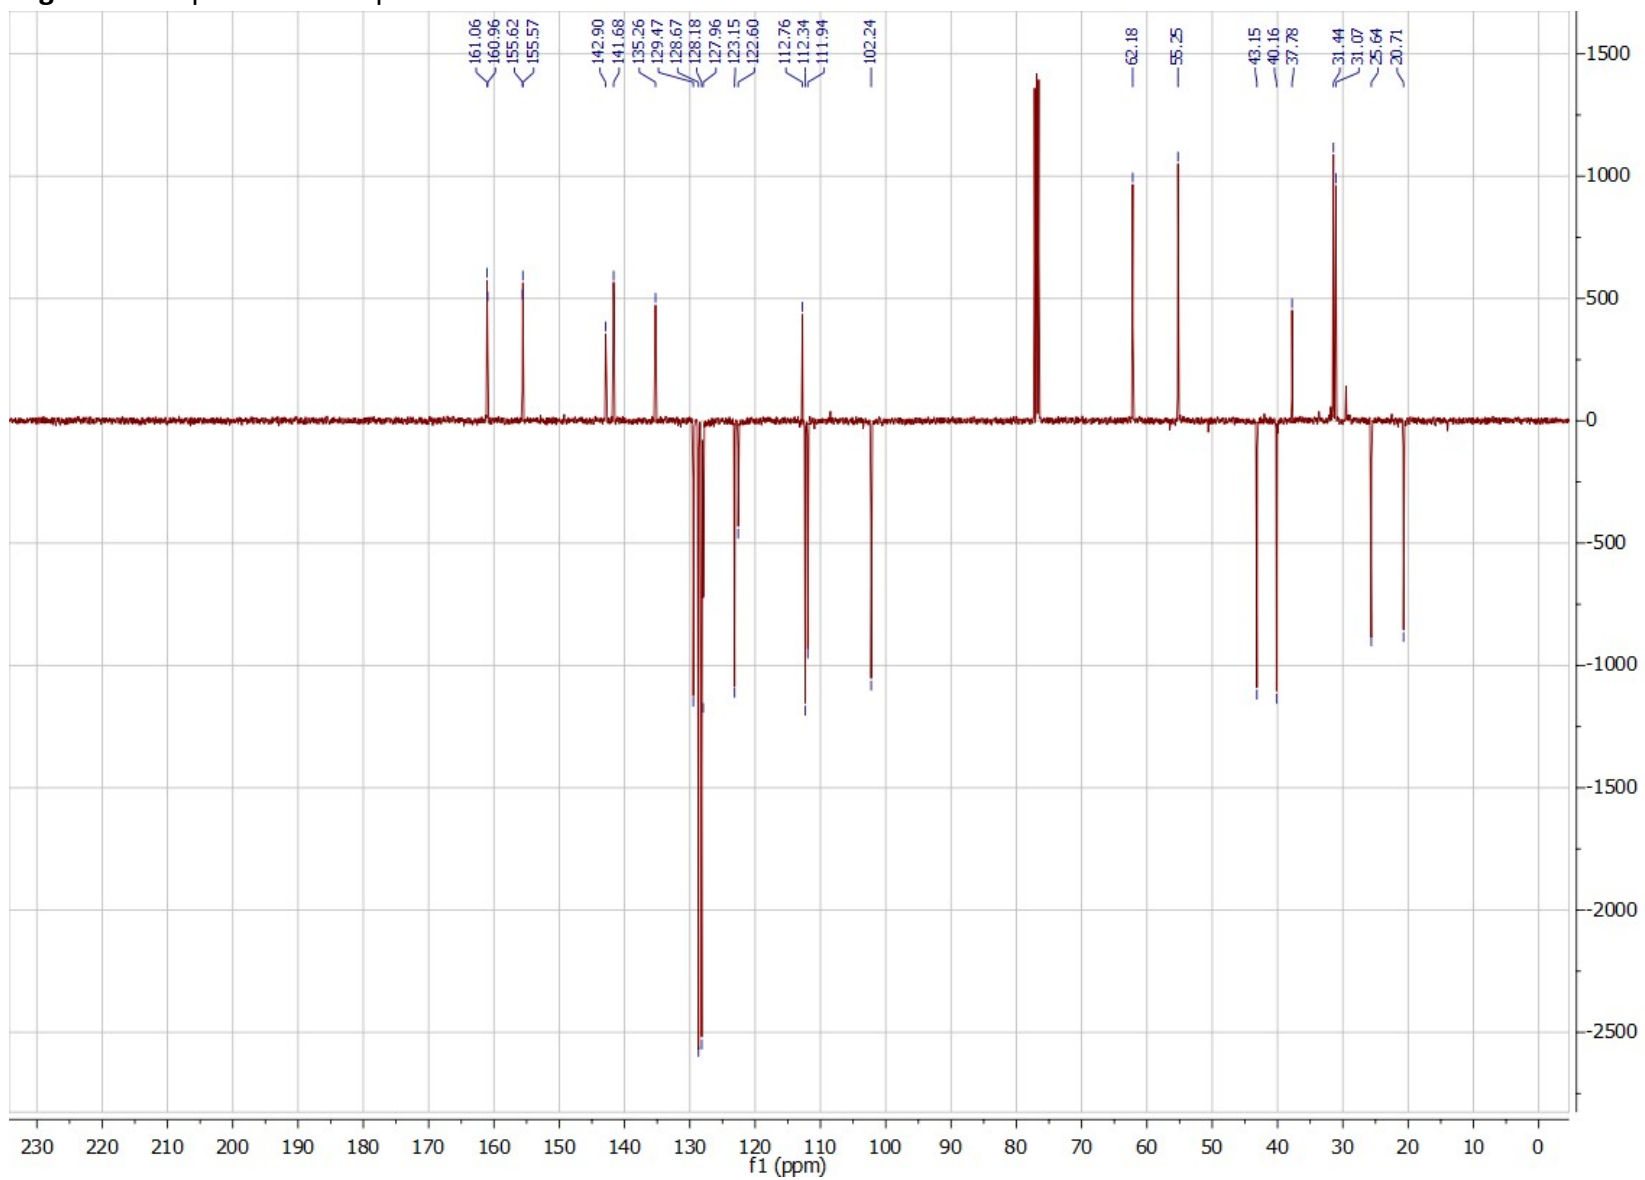

Fig. S21. <sup>1</sup>H spectra of Compound 48

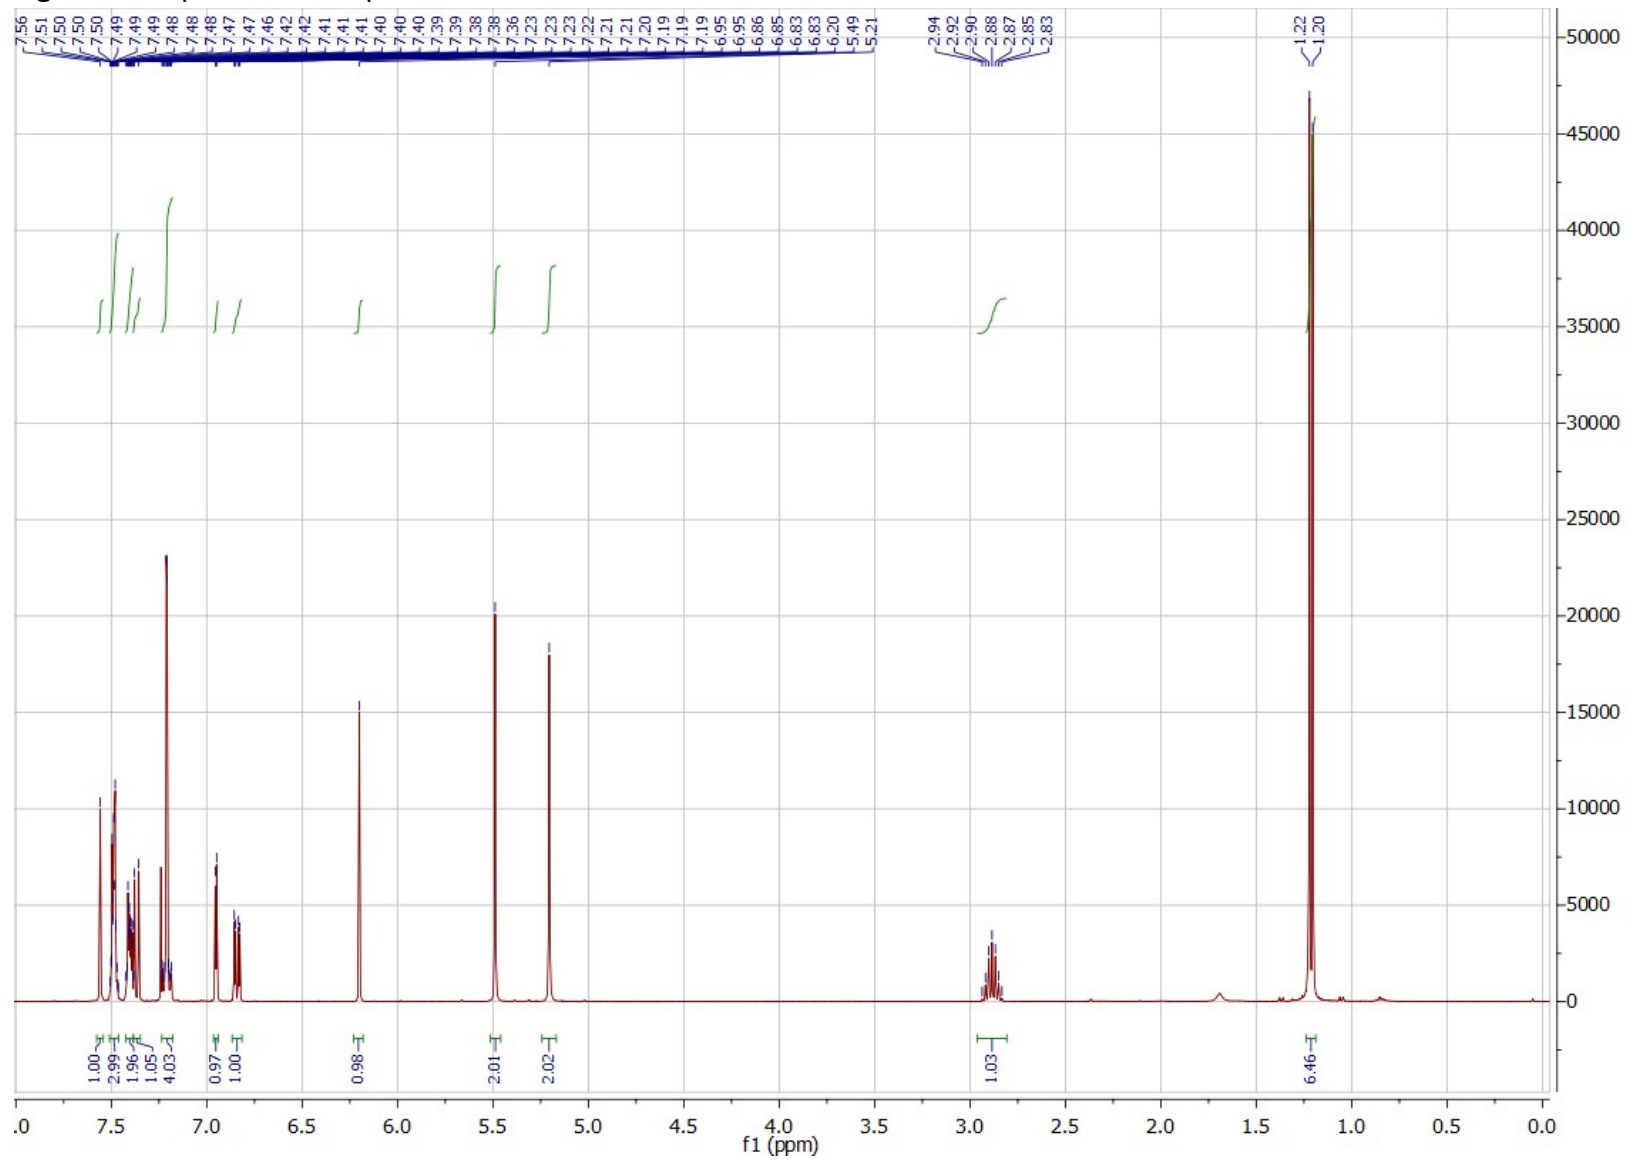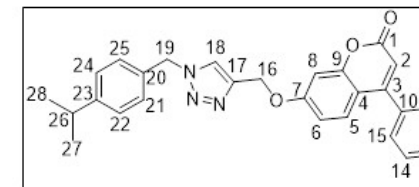

Fig. S22.  $^{13}\text{C}$  spectra of Compound 48

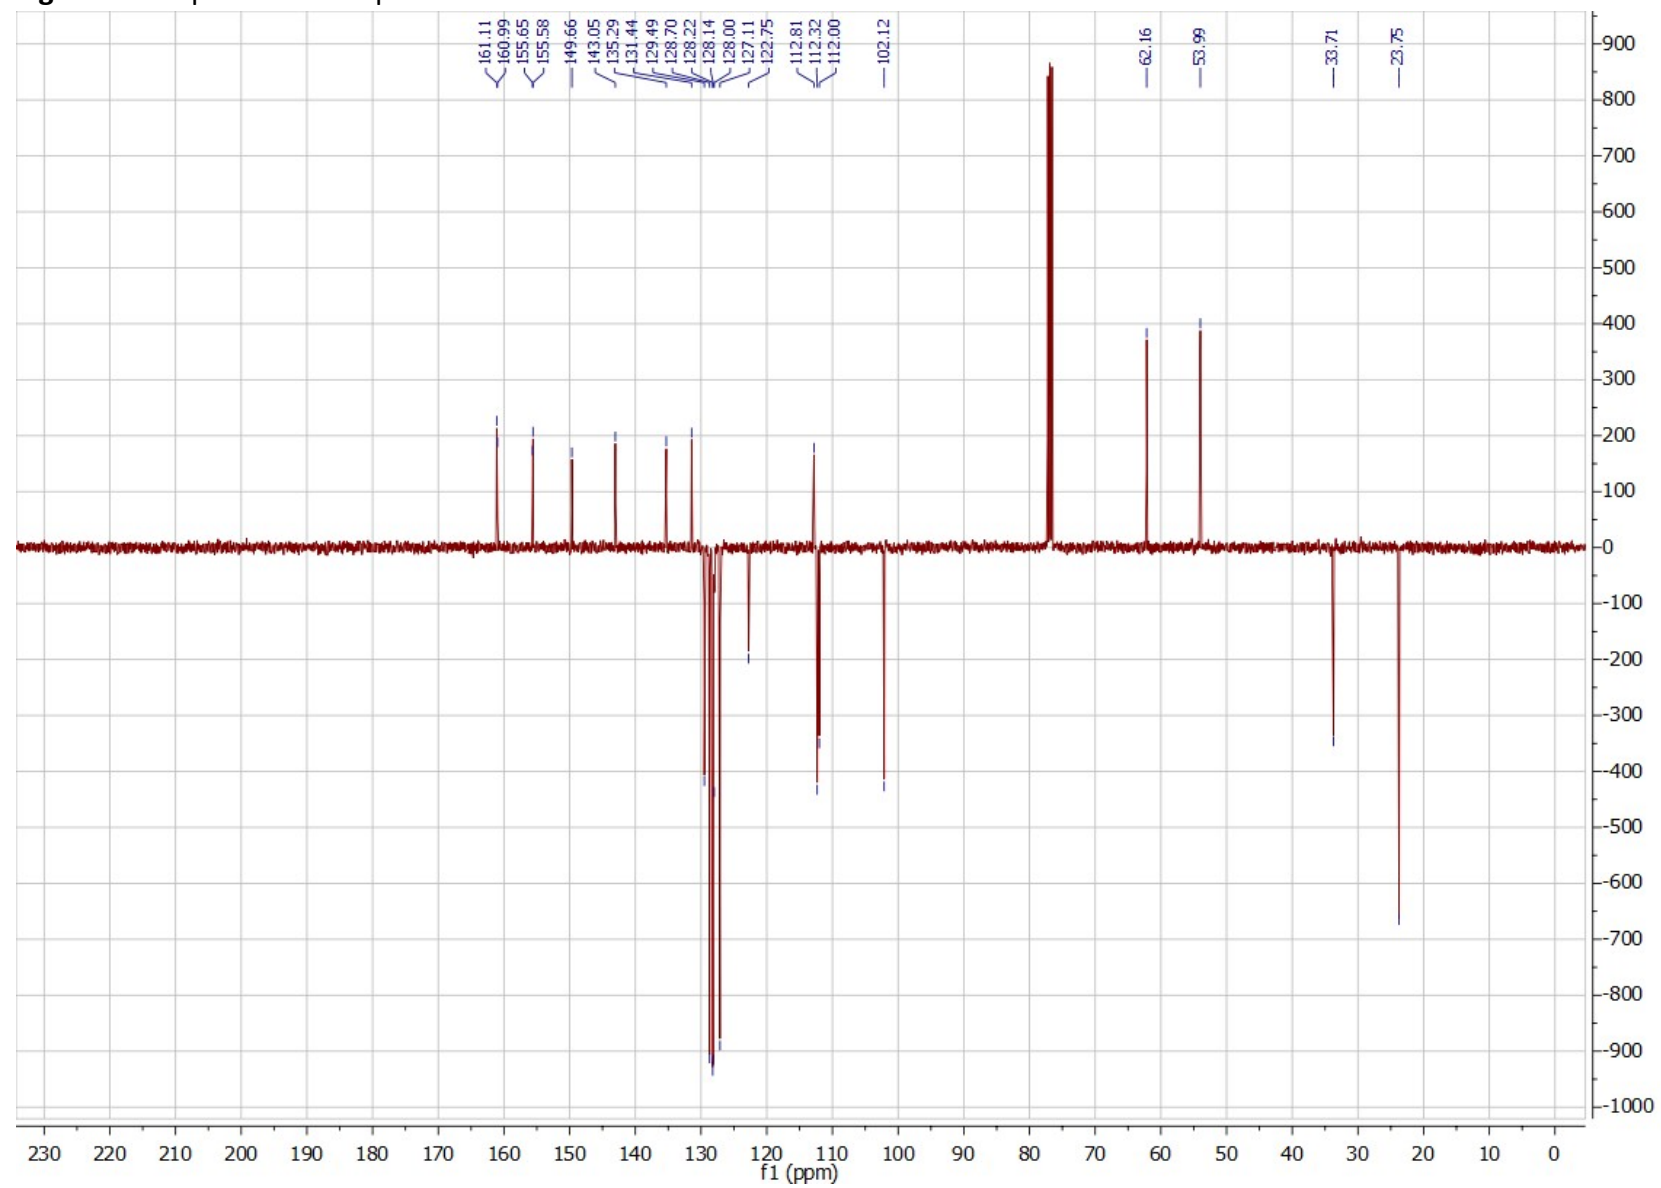

Fig. S23. <sup>1</sup>H spectra of Compound 49

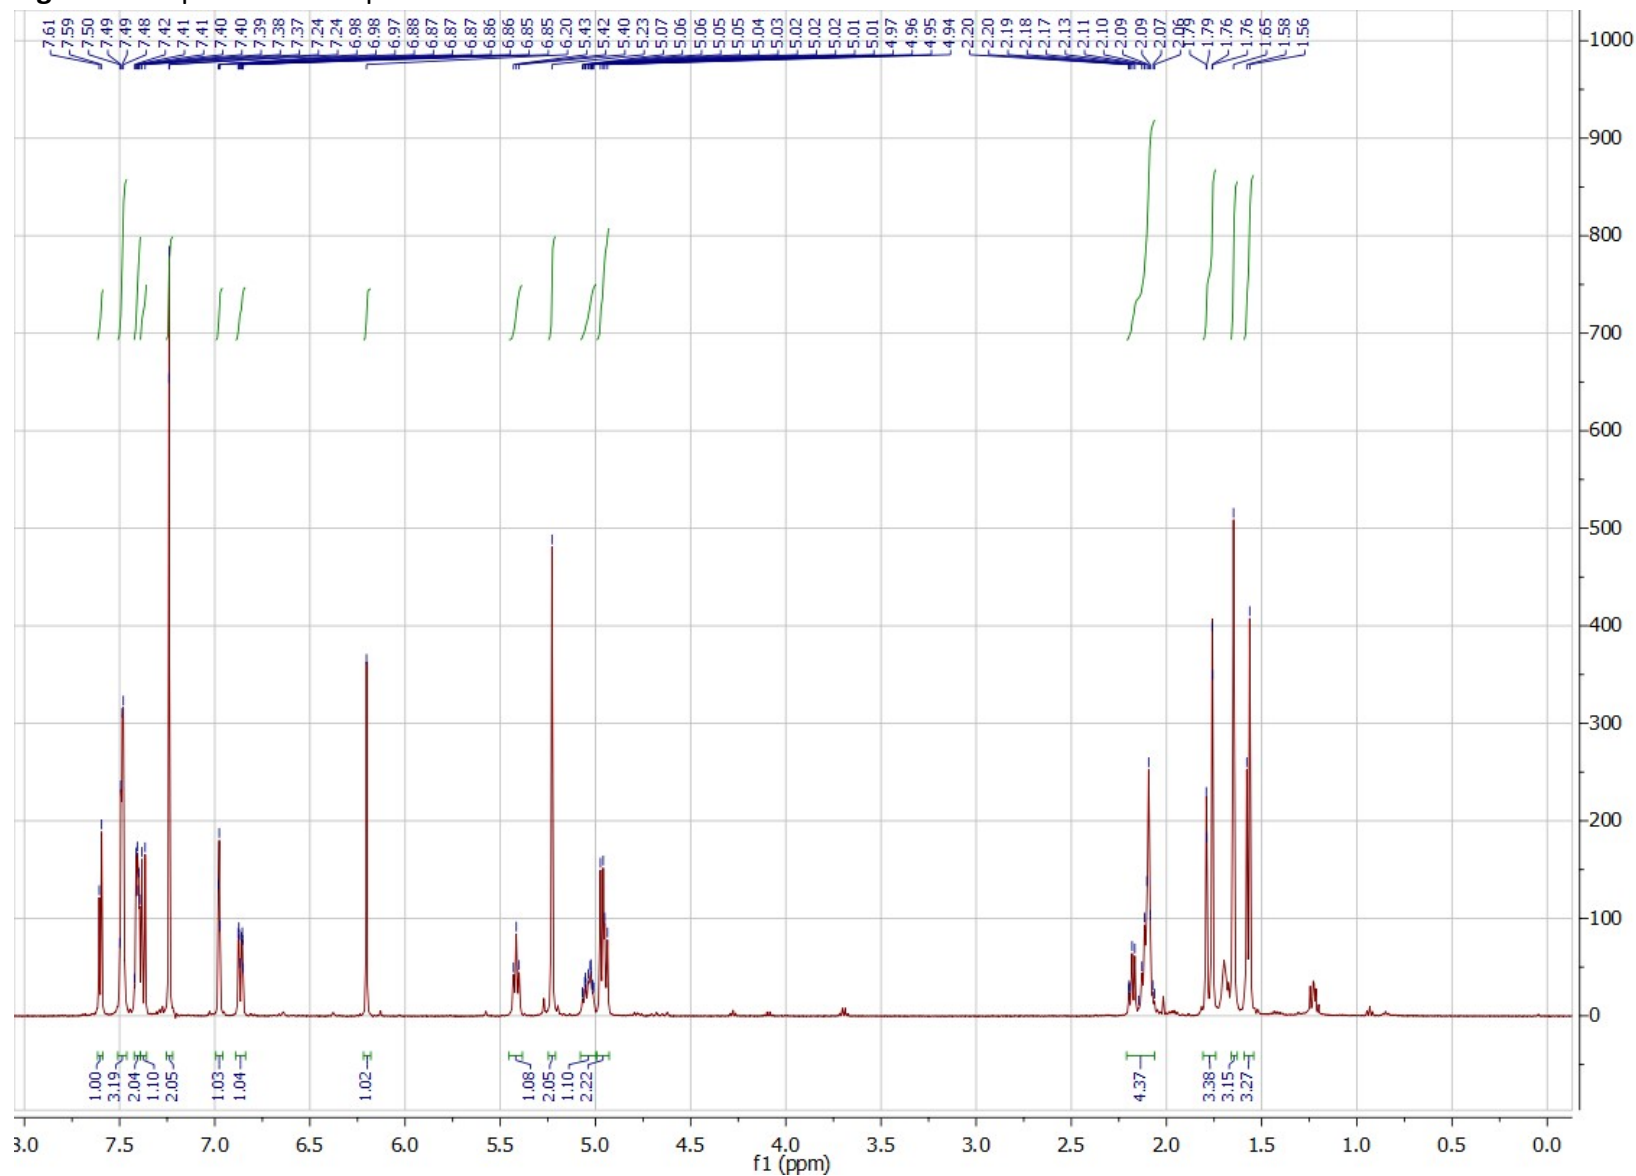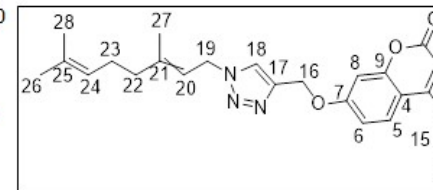

Fig. S24. <sup>13</sup>C spectra of Compound 49

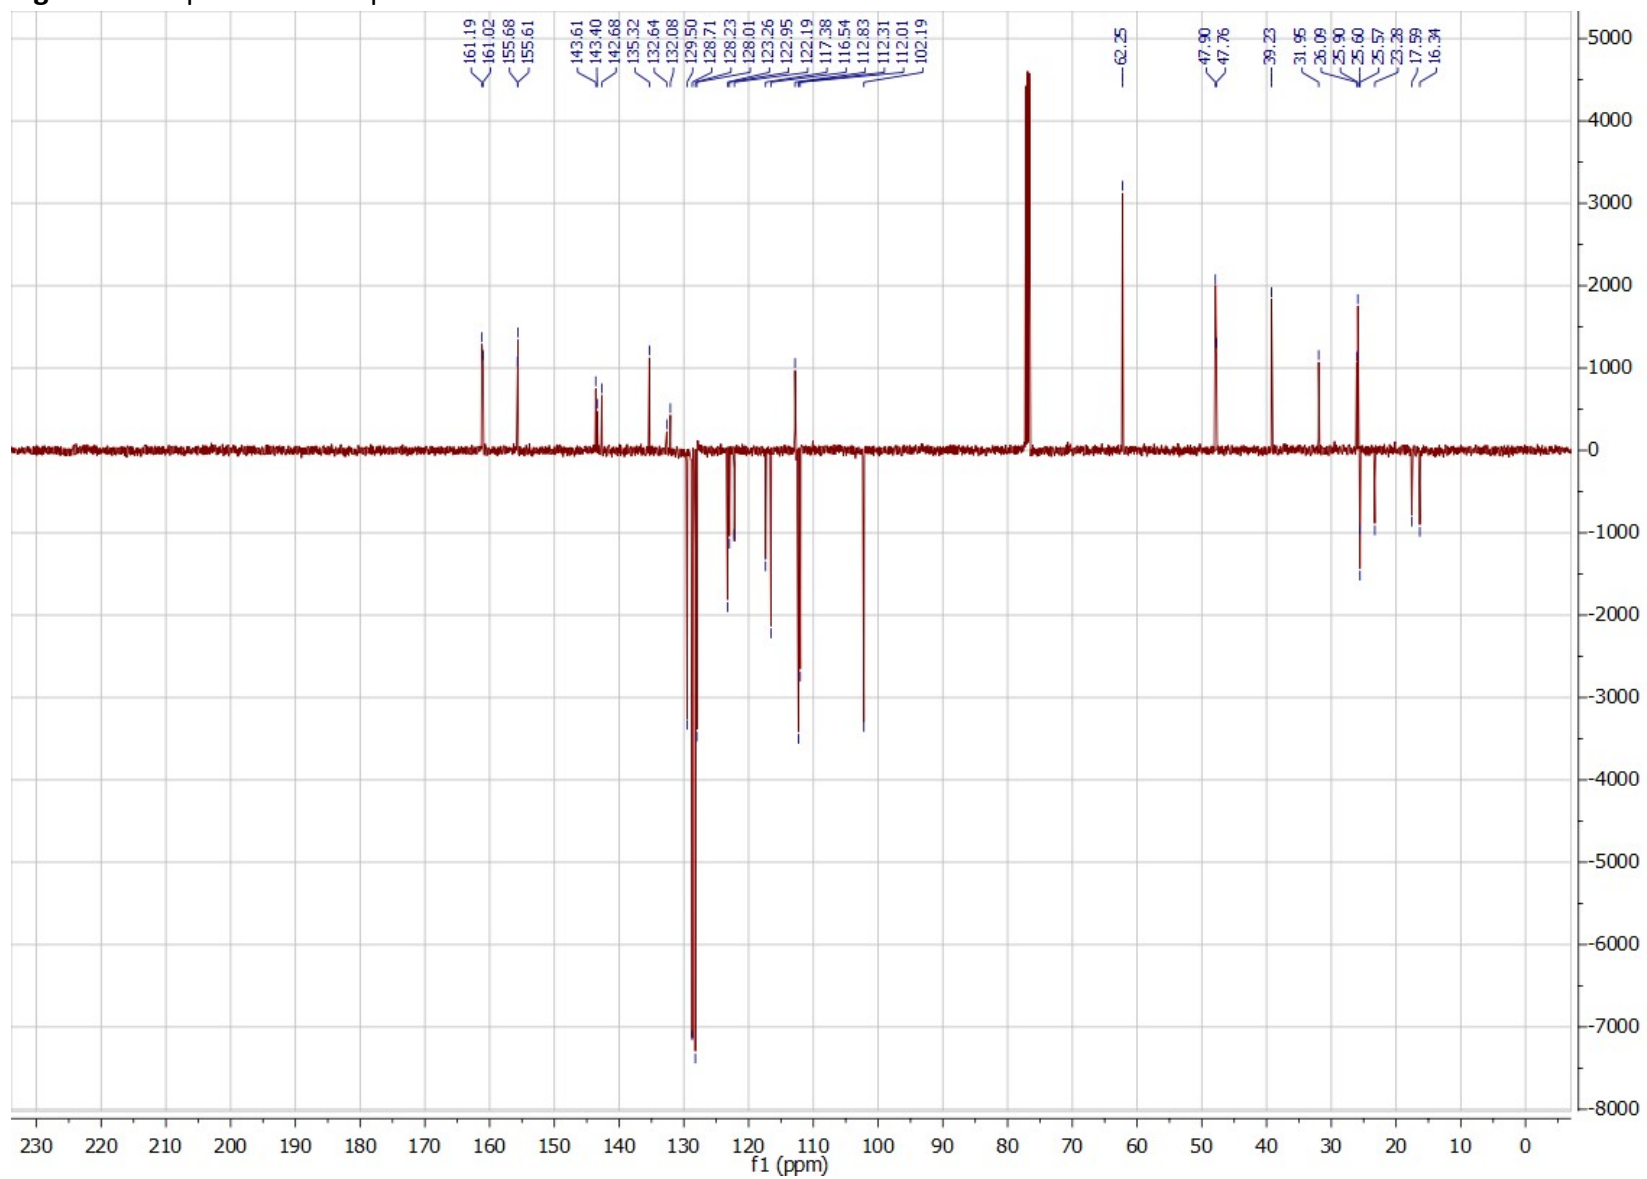

Fig. S25. <sup>1</sup>H spectra of Compound 50

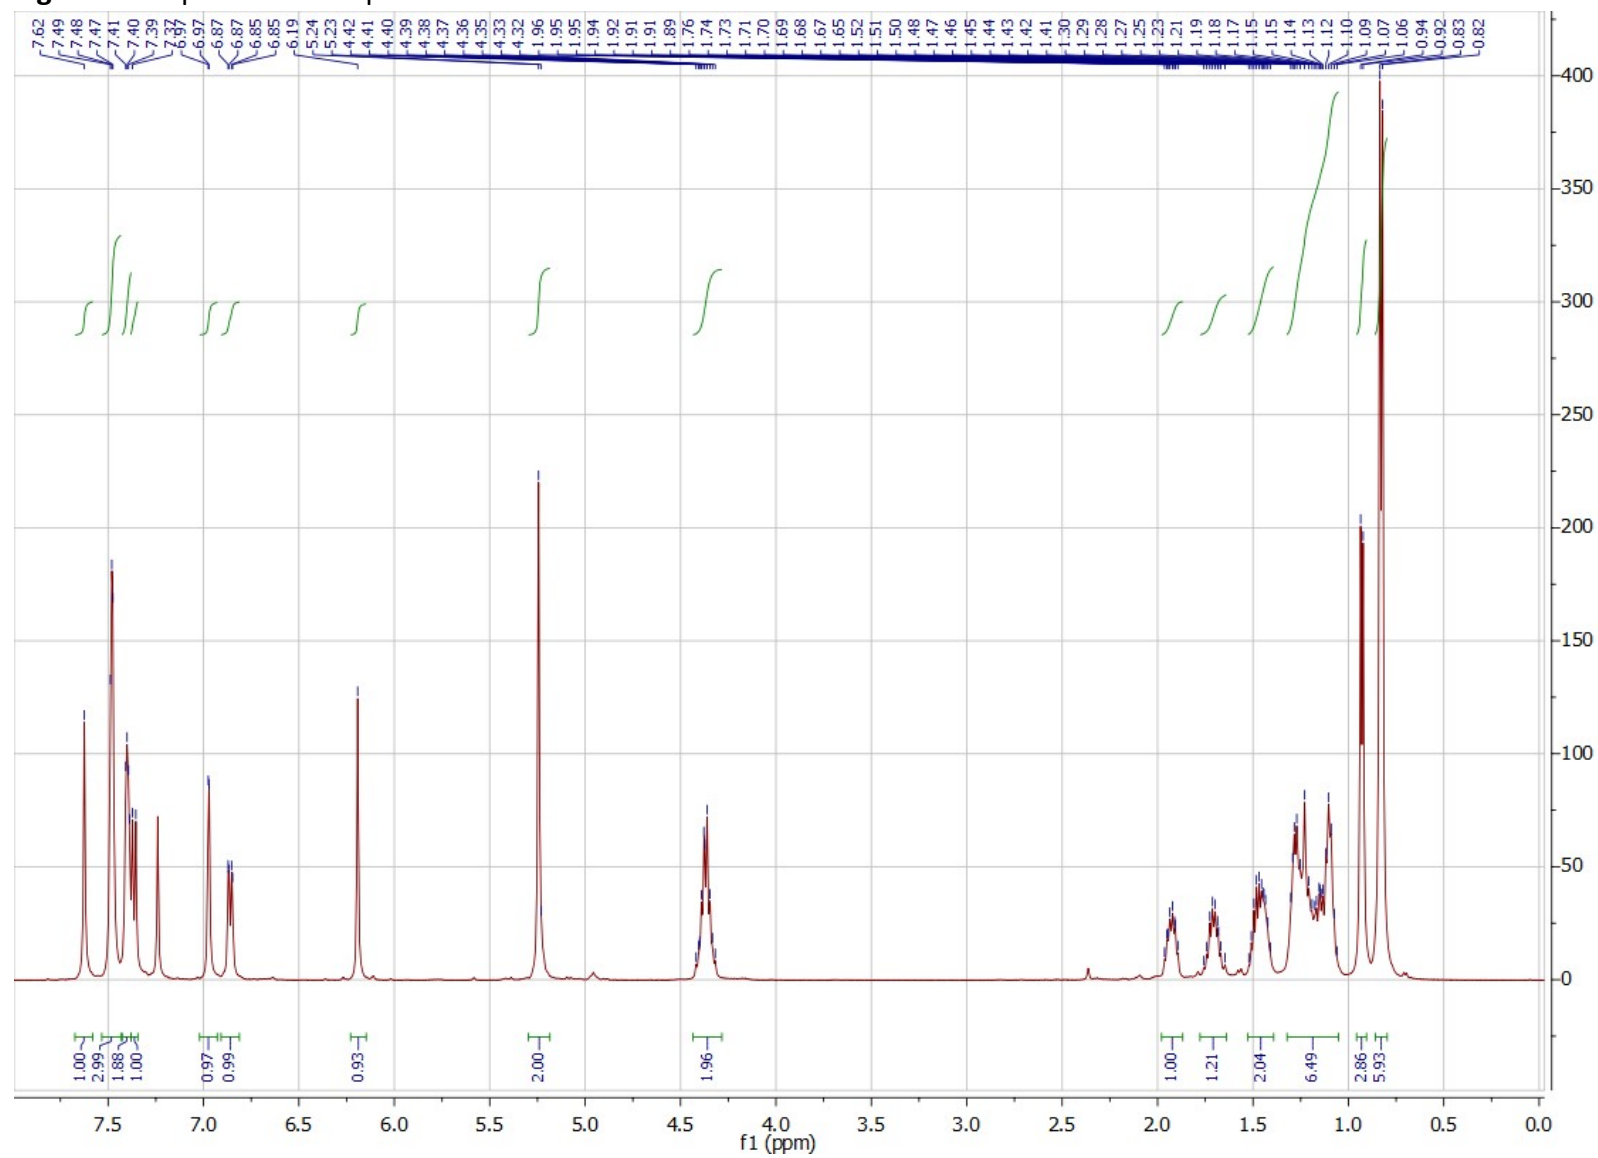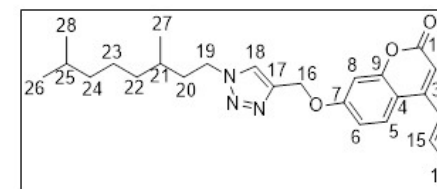

Fig. S26.  $^{13}\text{C}$  spectra of Compound 50

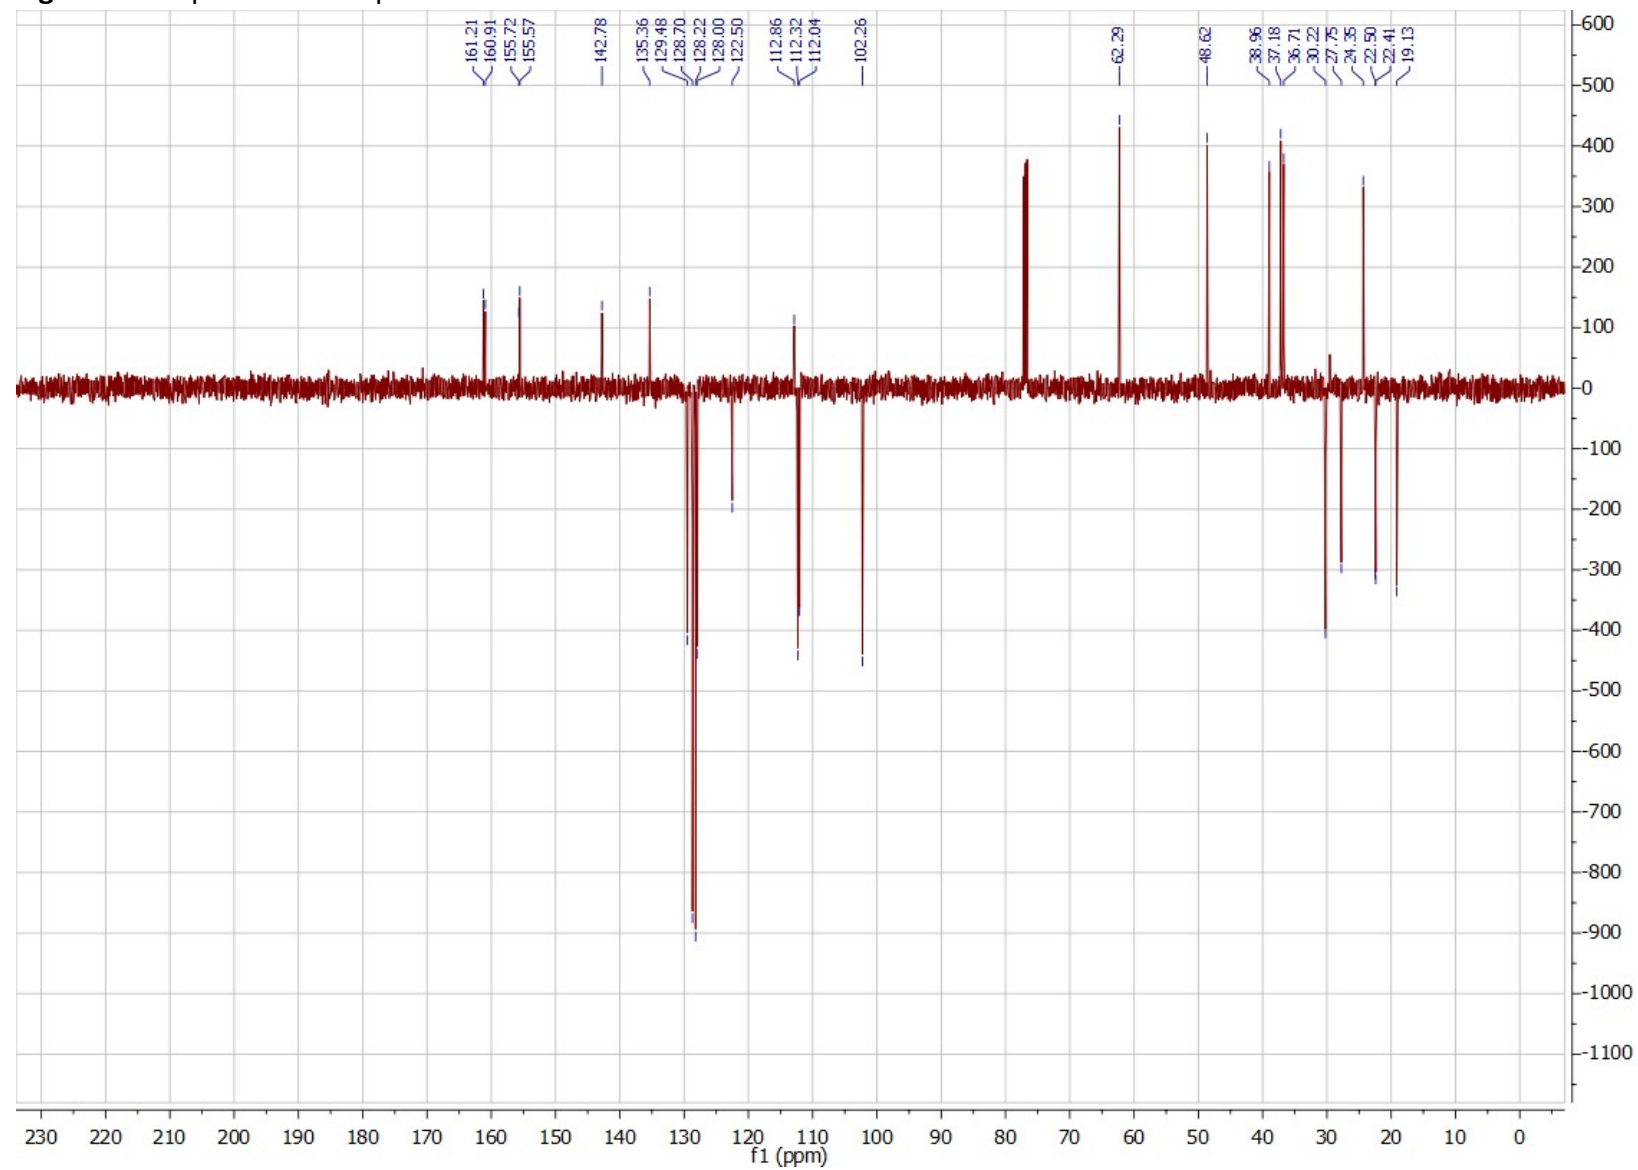

Fig. S27. <sup>1</sup>H spectra of Compound 51

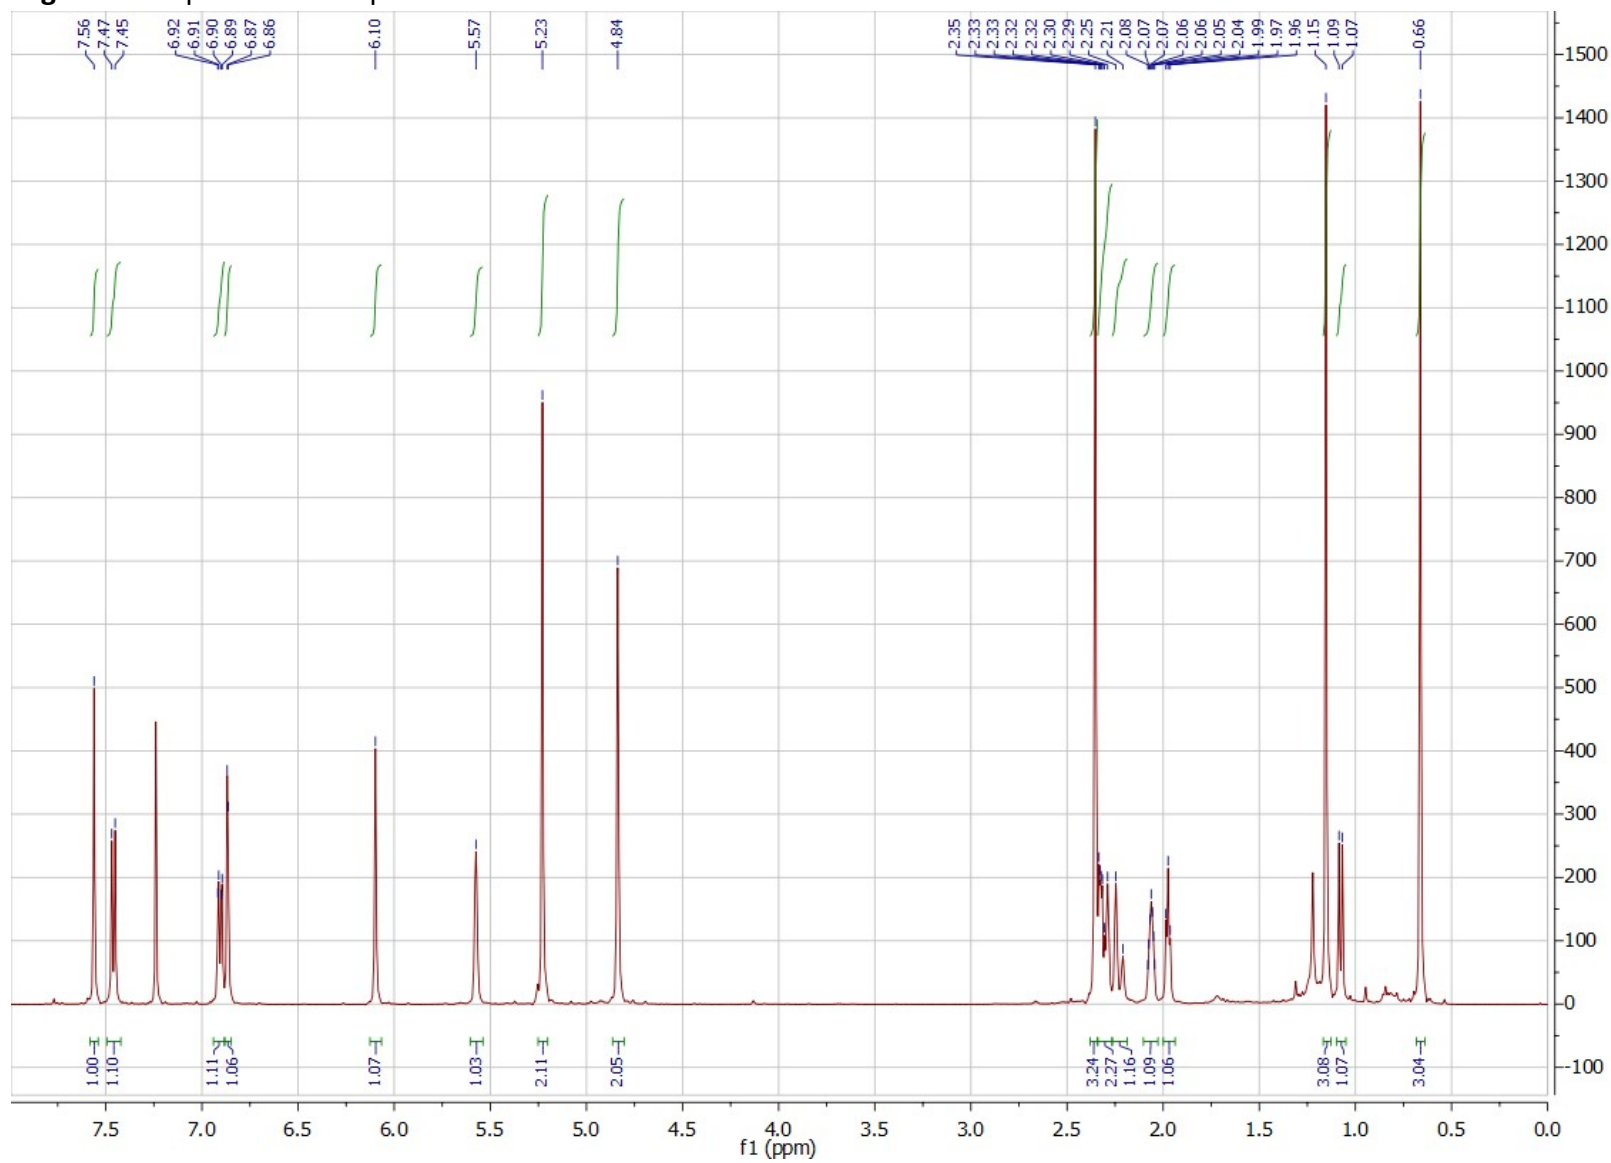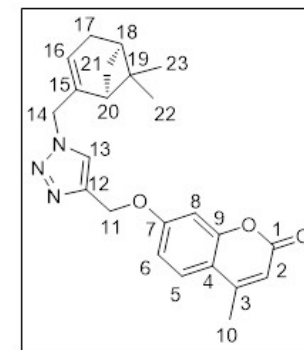



Fig. S28.  $^{13}\text{C}$  spectra of Compound 51

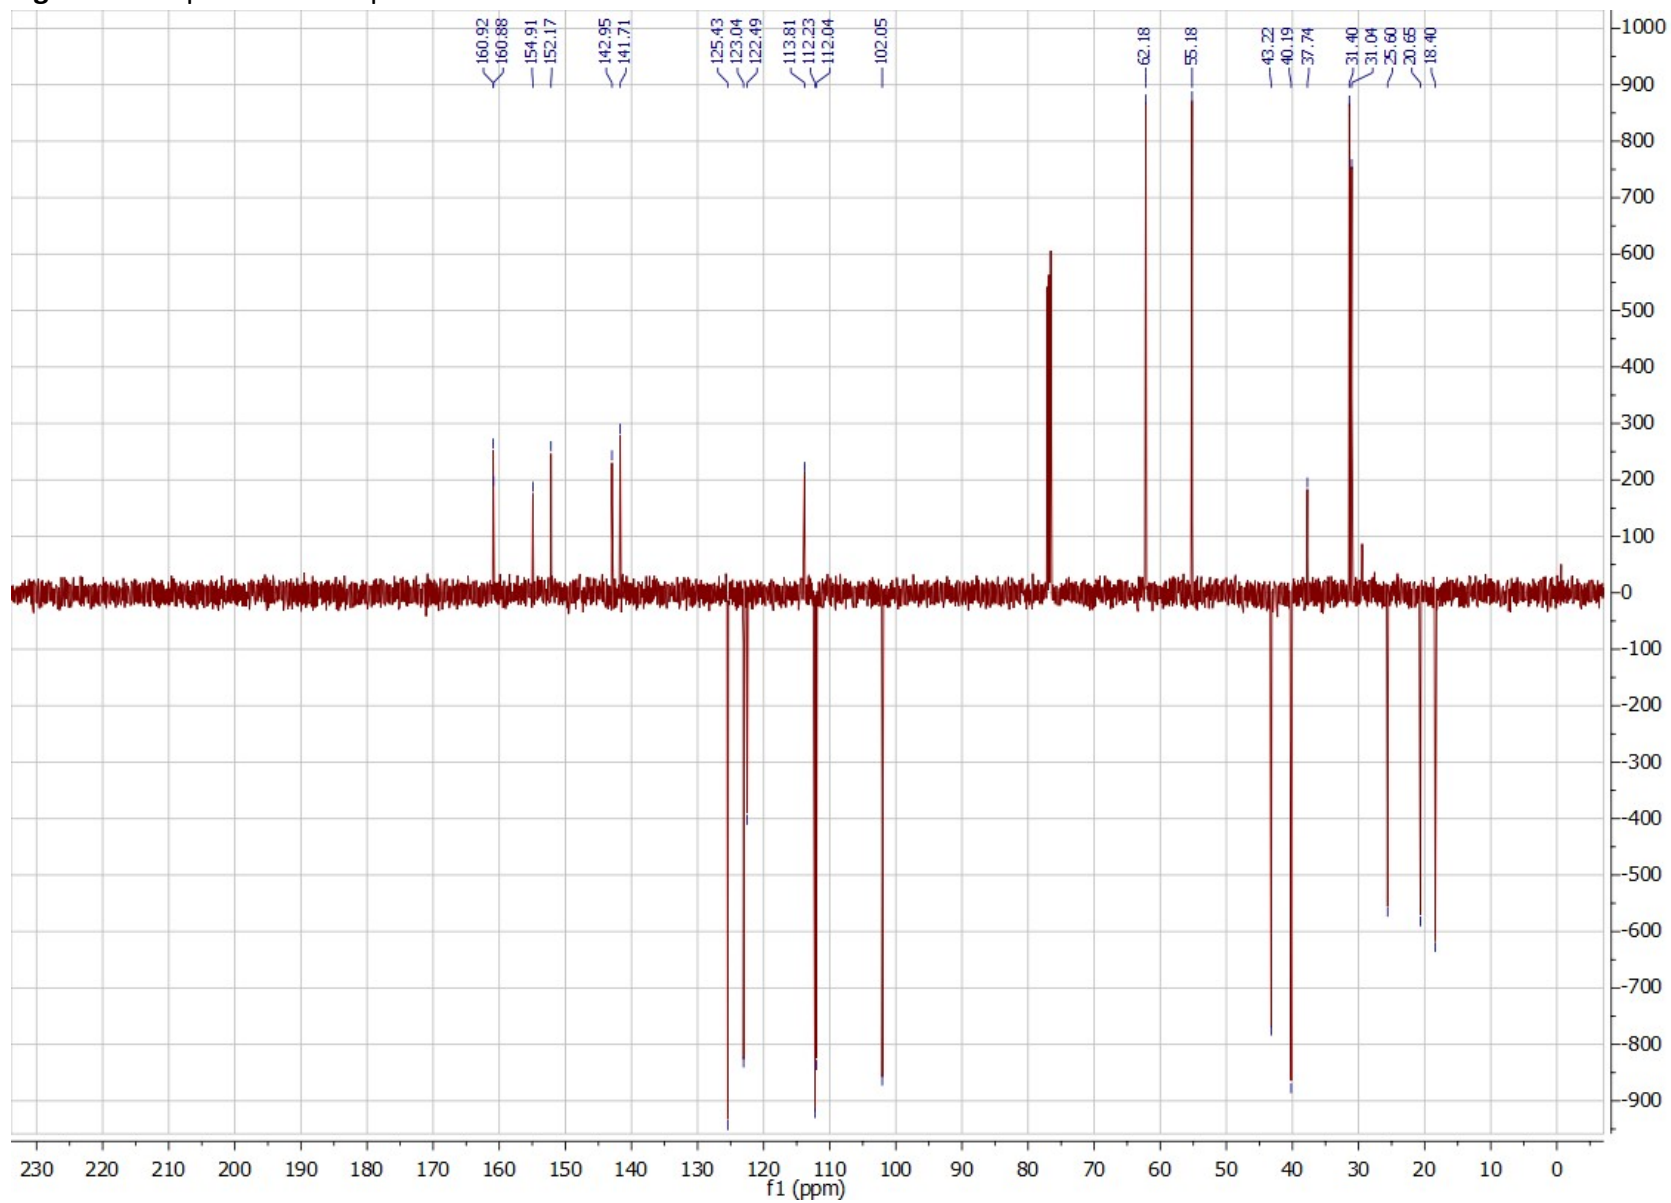

Fig. S29. <sup>1</sup>H spectra of Compound 53

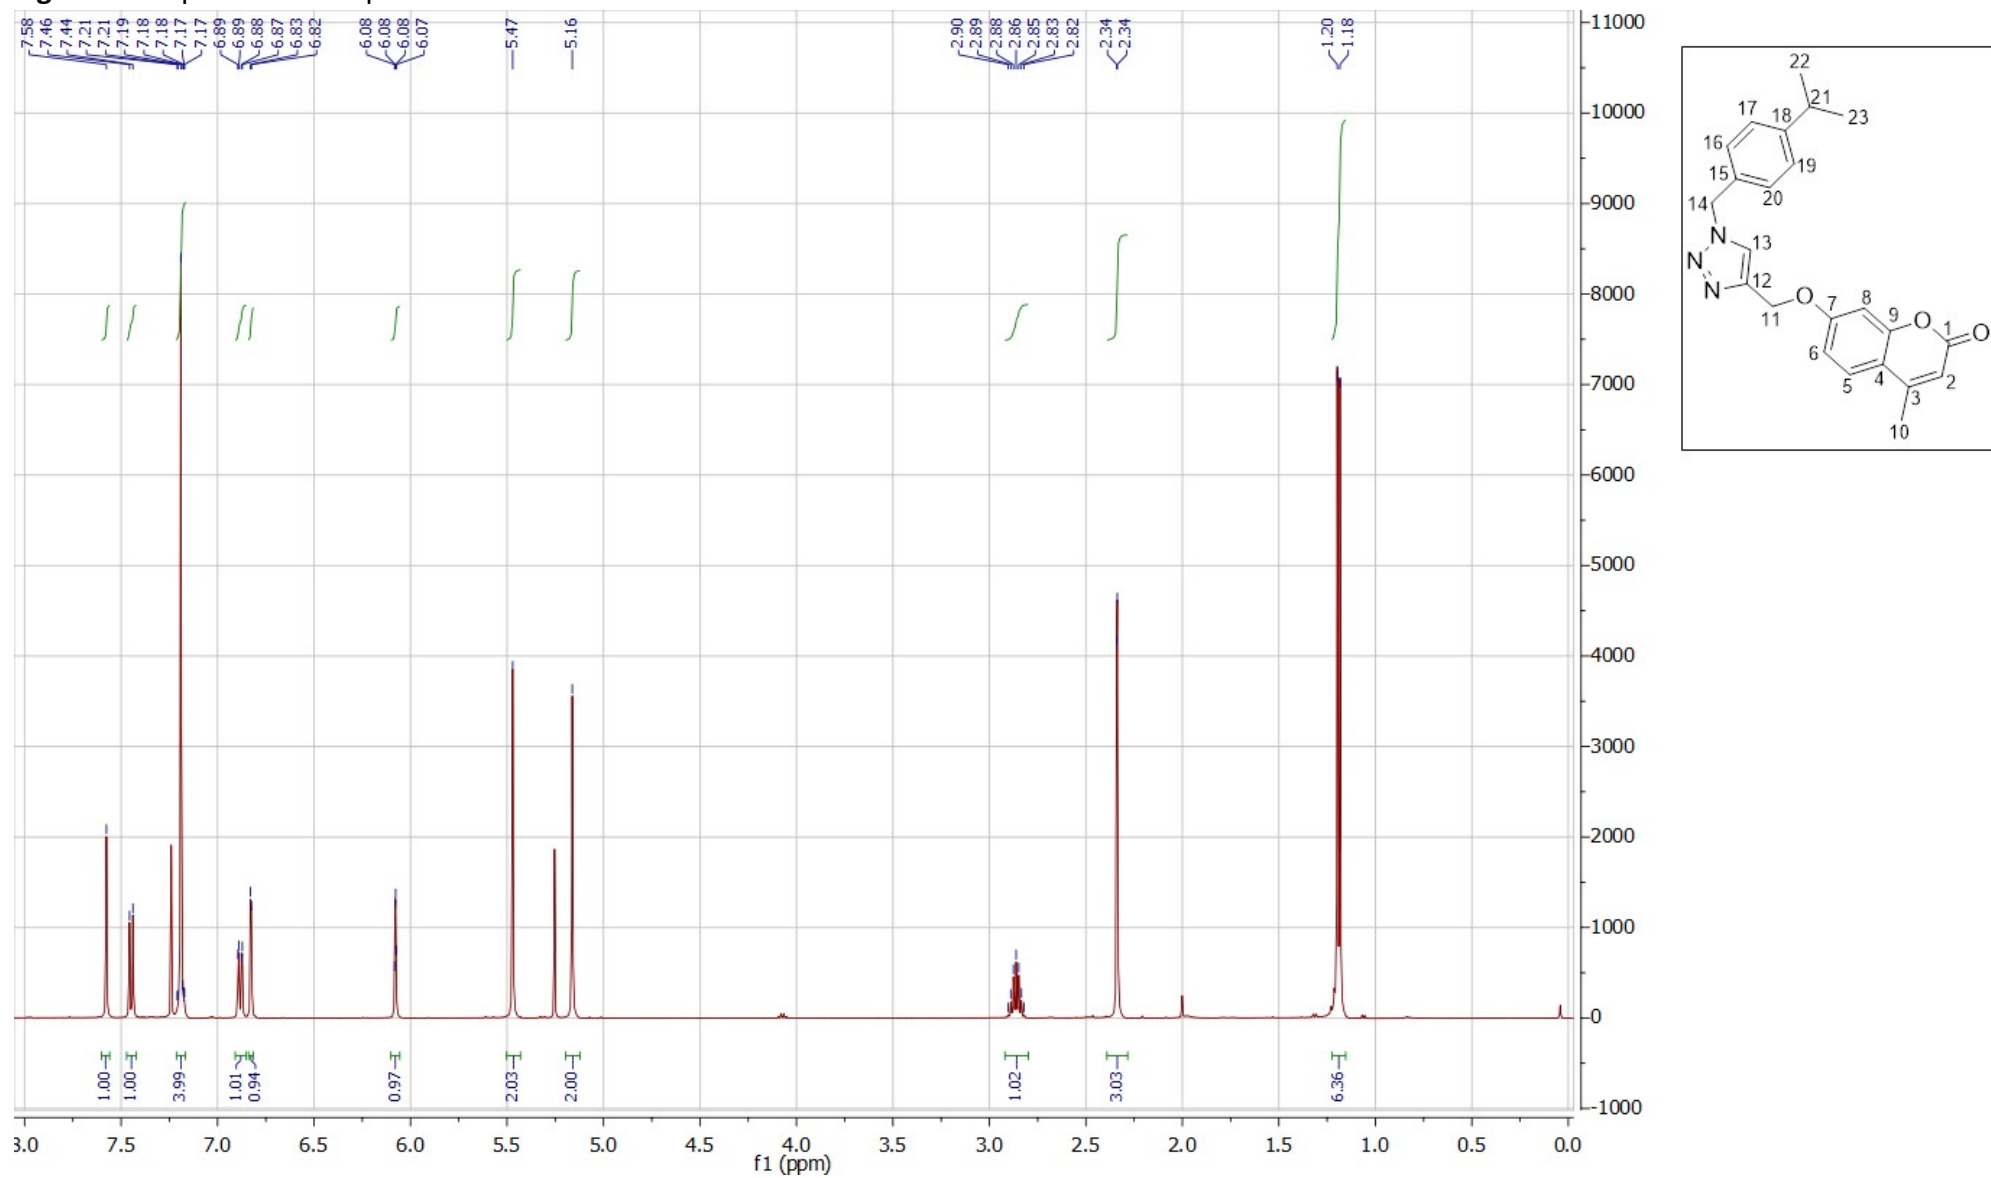

Fig. S30.  $^{13}\text{C}$  spectra of Compound 53

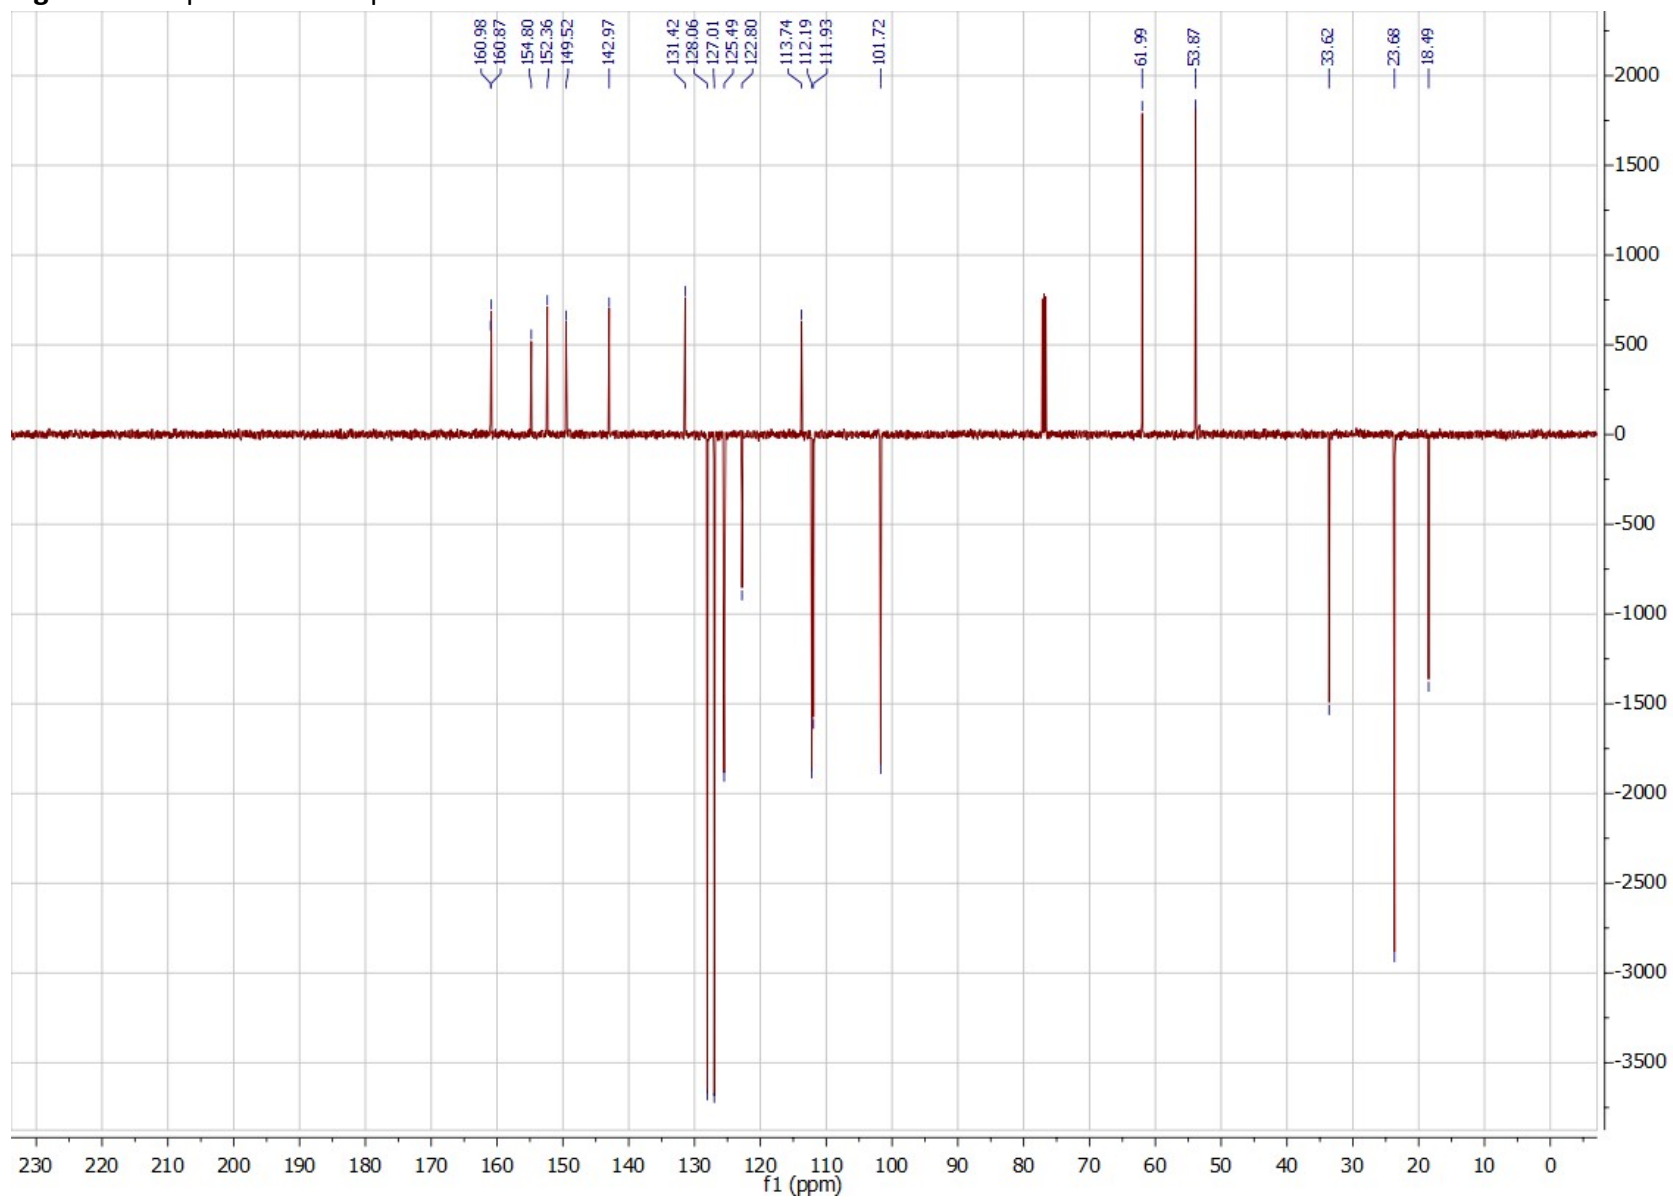

Fig. S31. <sup>1</sup>H spectra of Compound 54-E

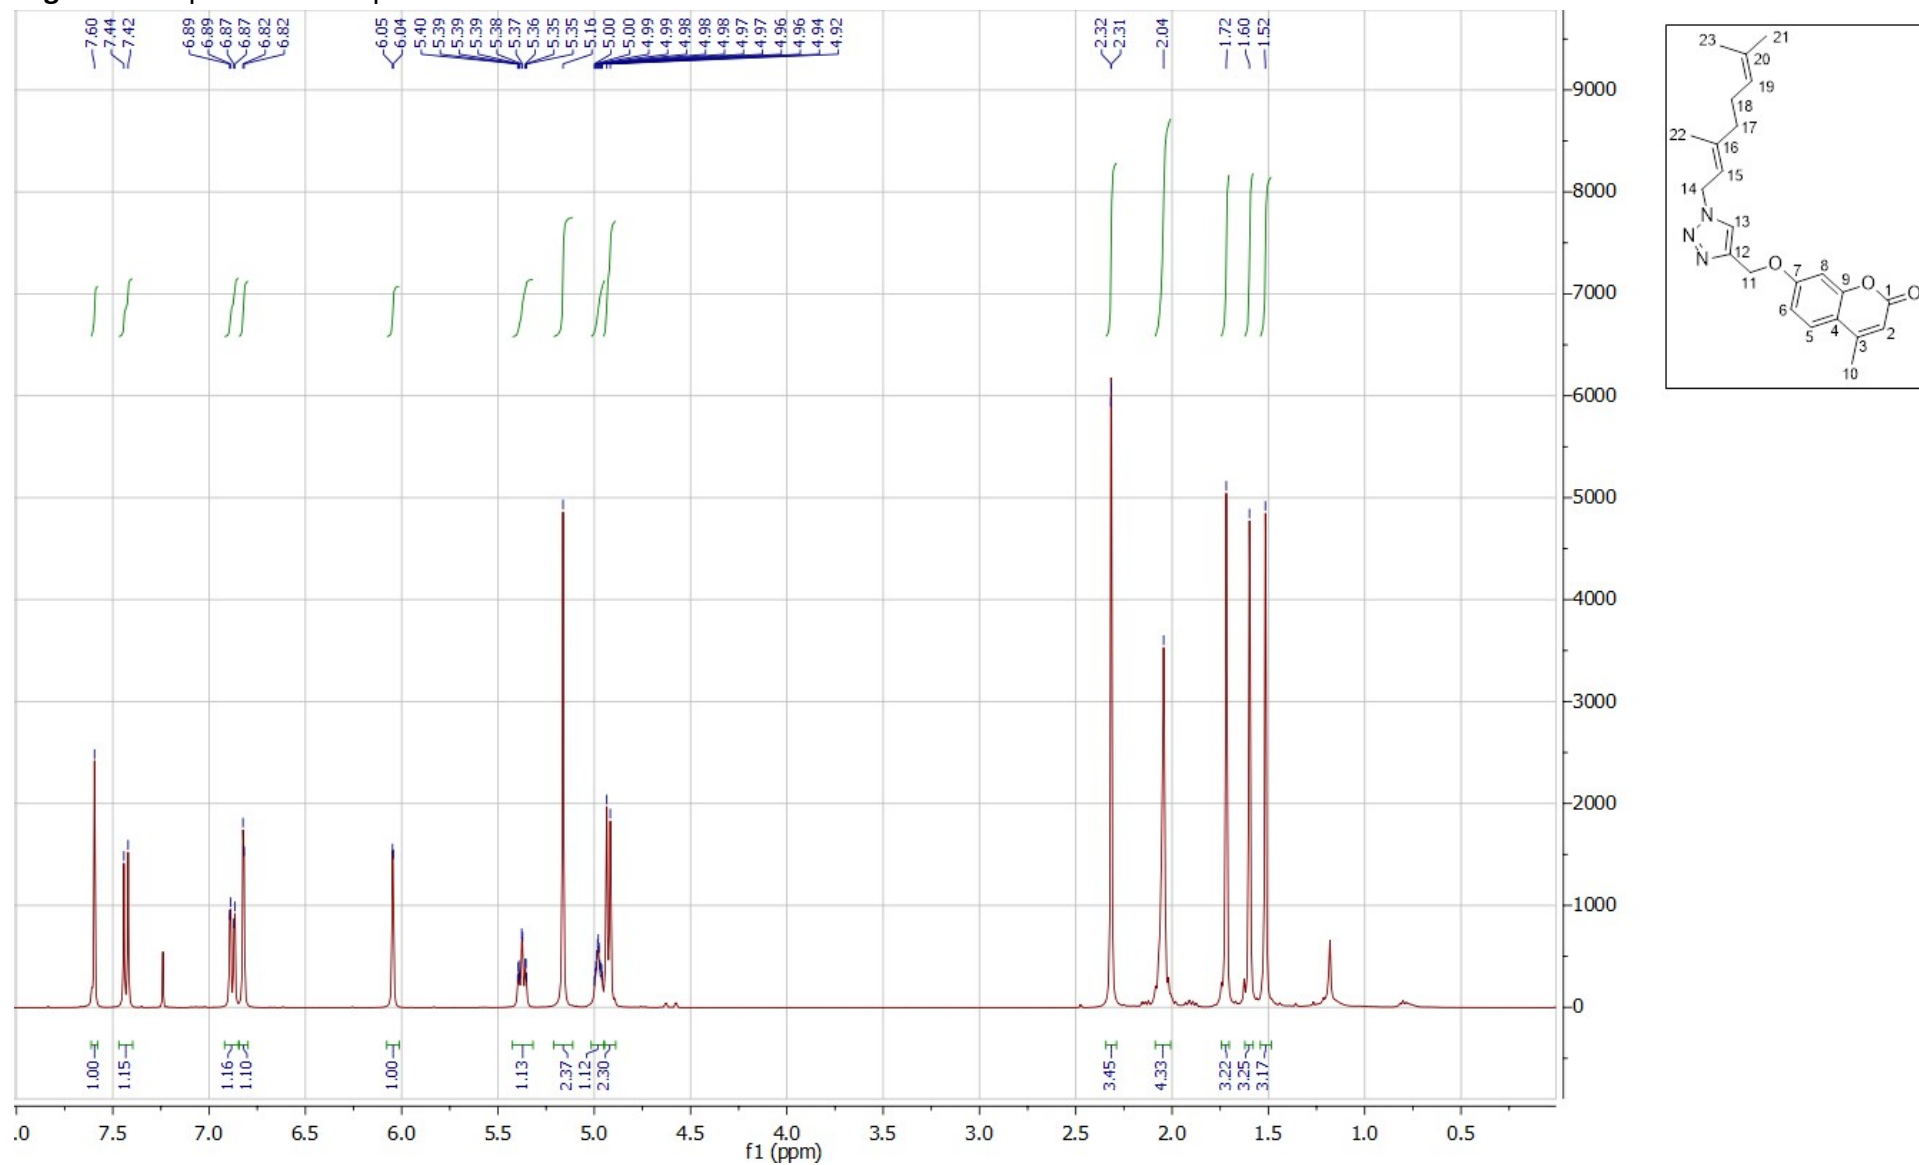

Fig. S32.  $^{13}\text{C}$  spectra of Compound 54-E

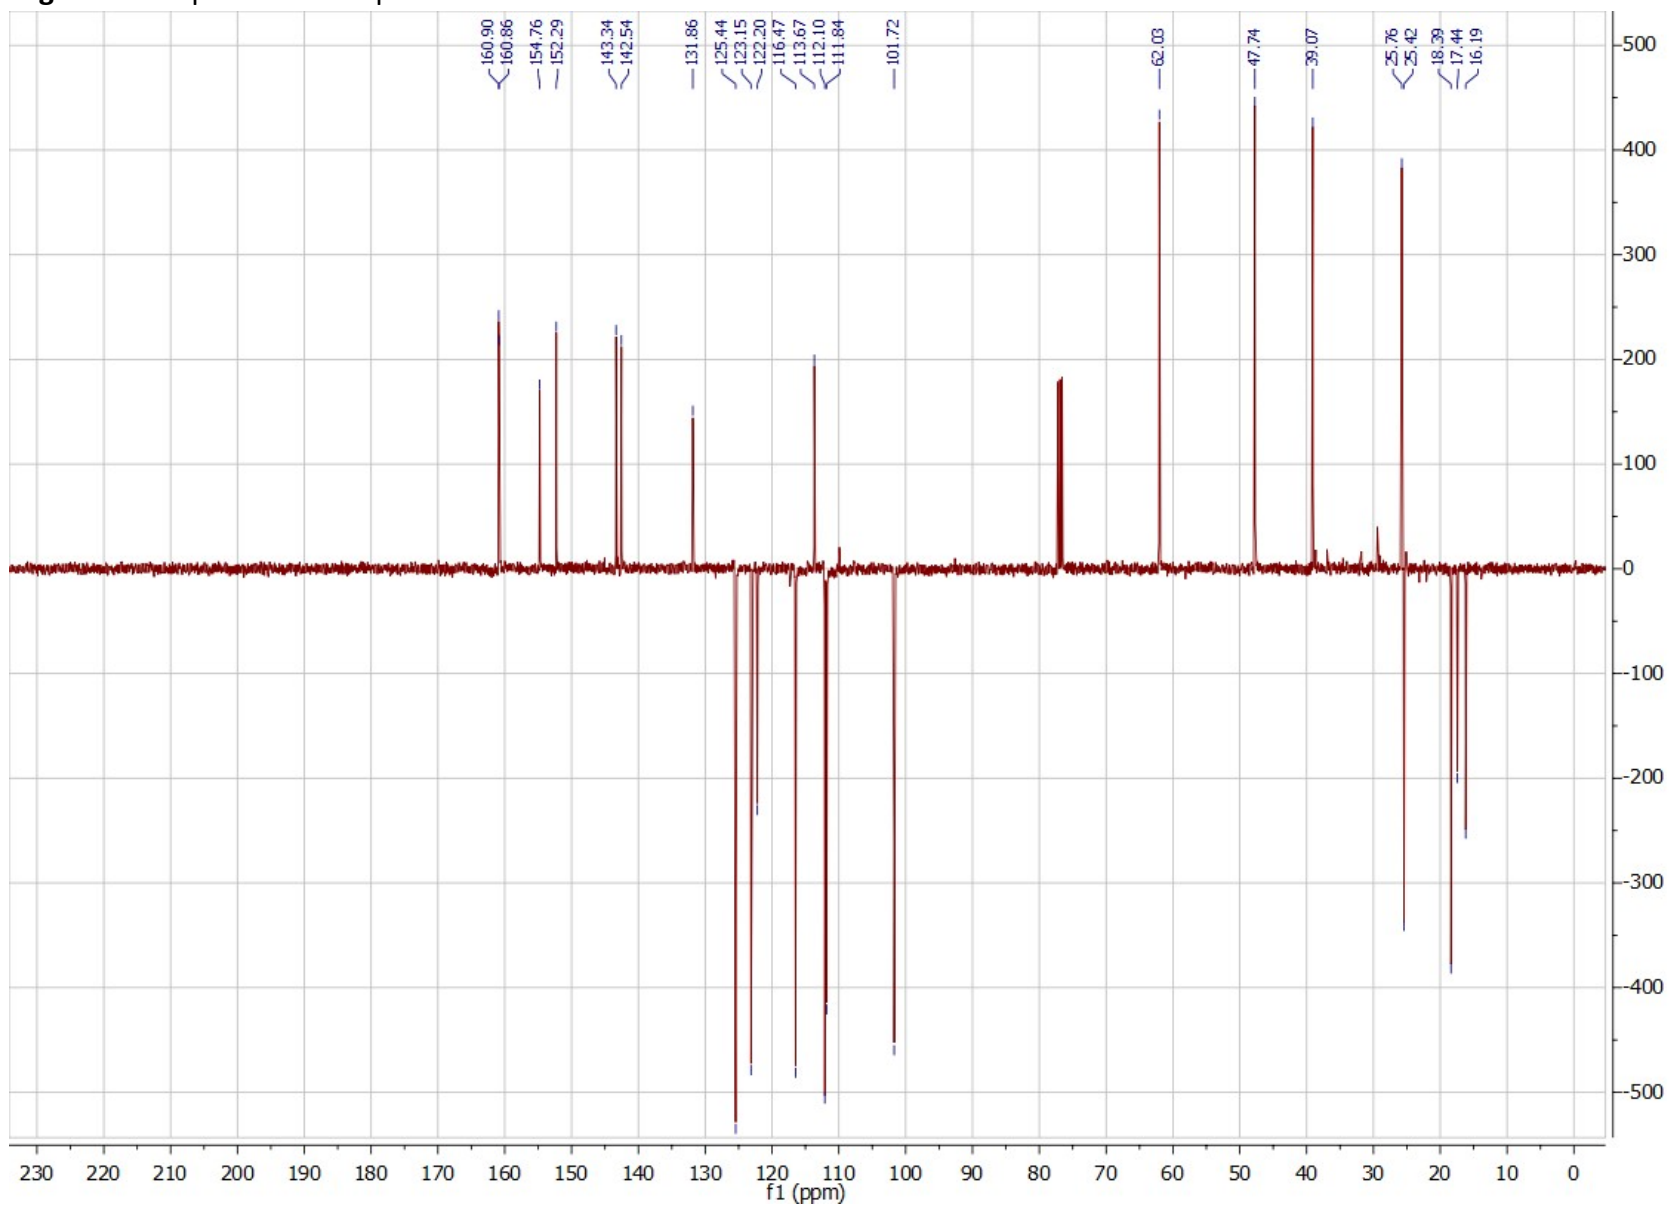

Fig. S33. <sup>1</sup>H spectra of Compound 54-Z

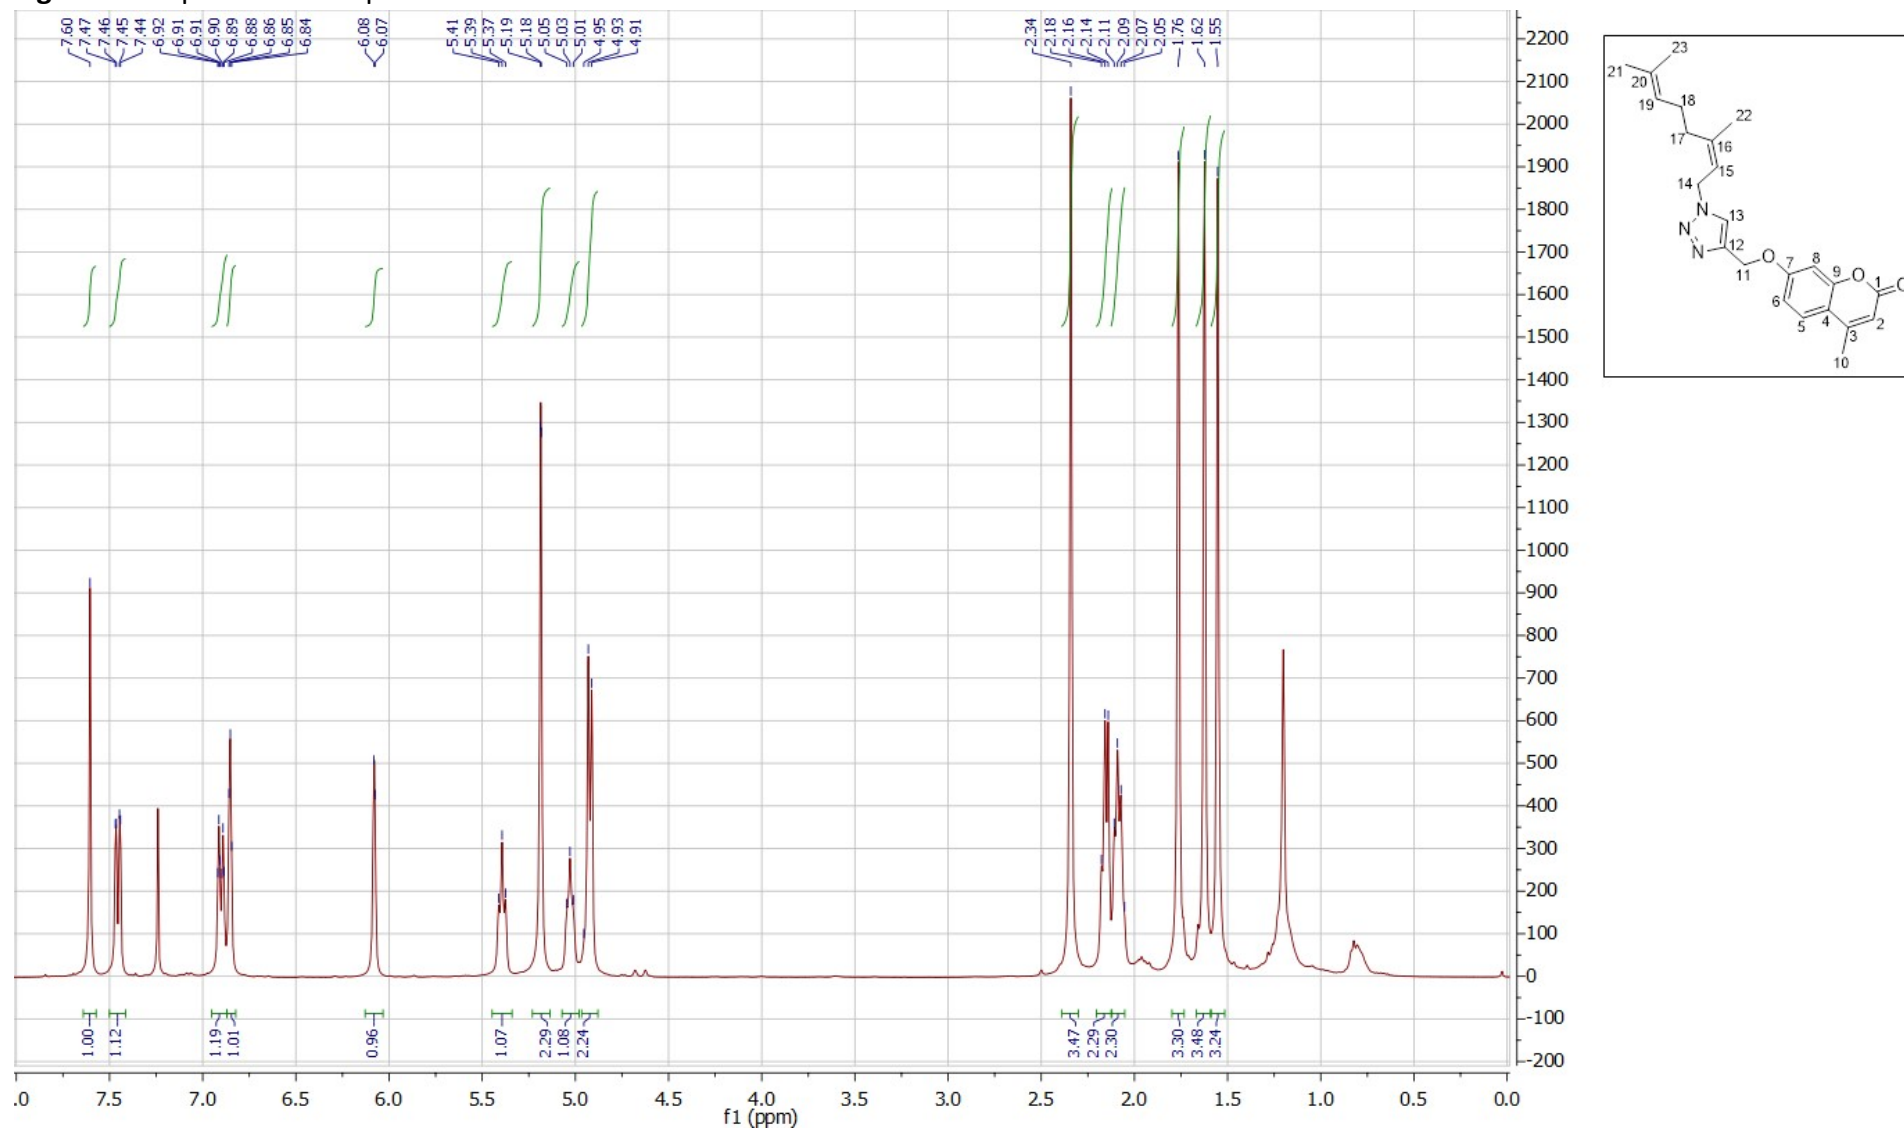

Fig. S34.  $^{13}\text{C}$  spectra of Compound 54-Z

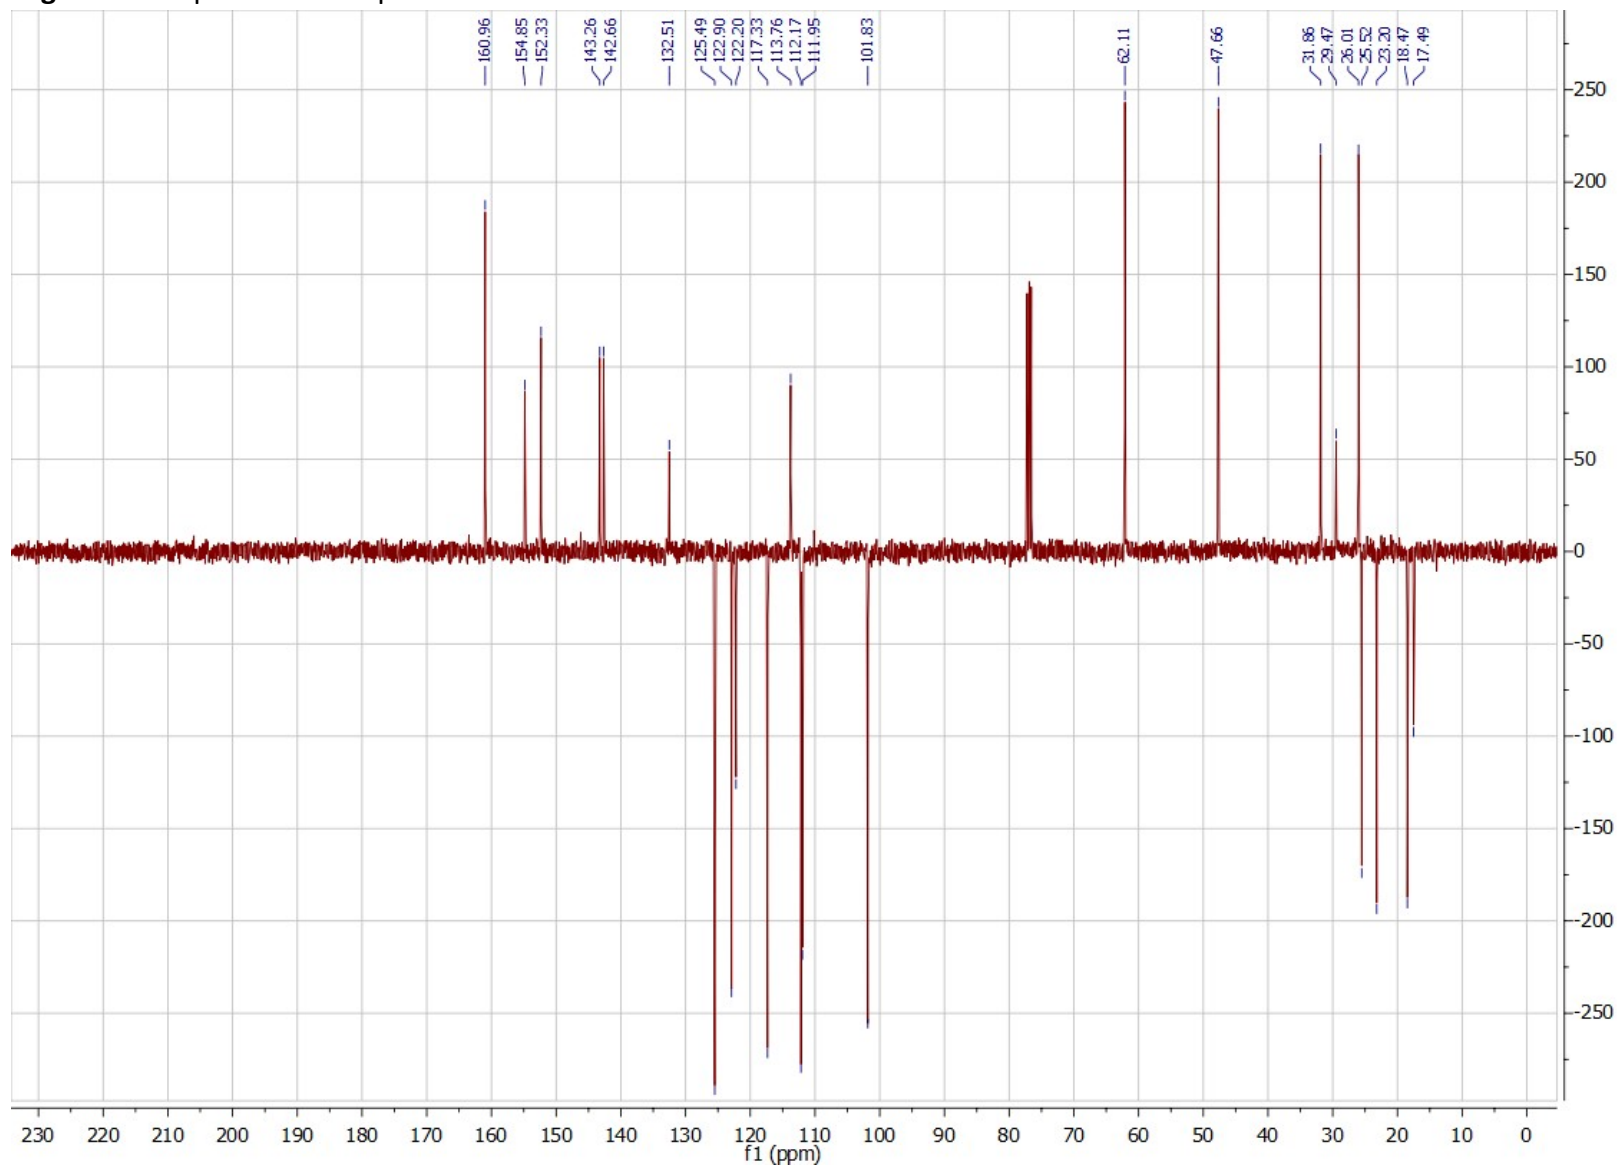

Fig. S35. <sup>1</sup>H spectra of Compound 55

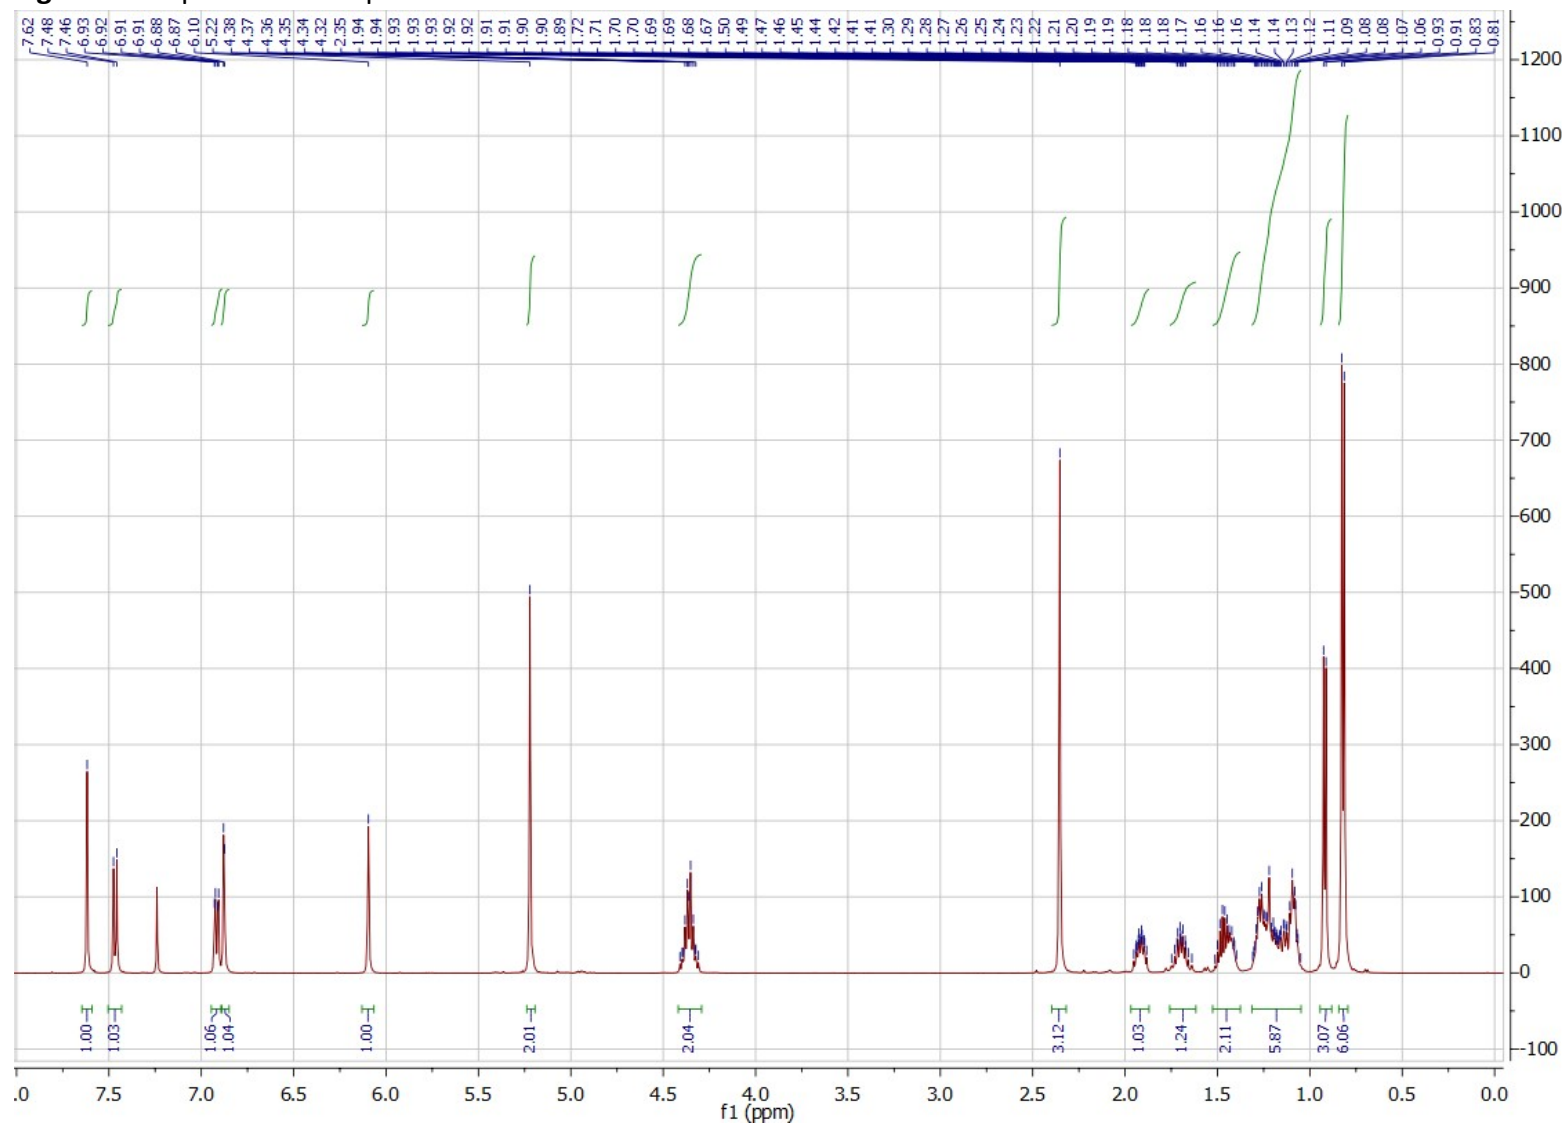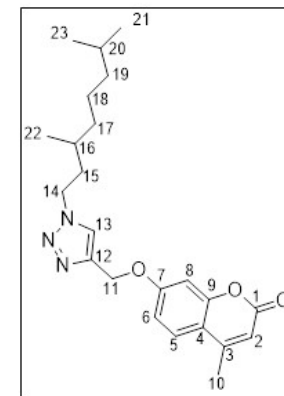



Fig. S36.  $^{13}\text{C}$  spectra of Compound 55

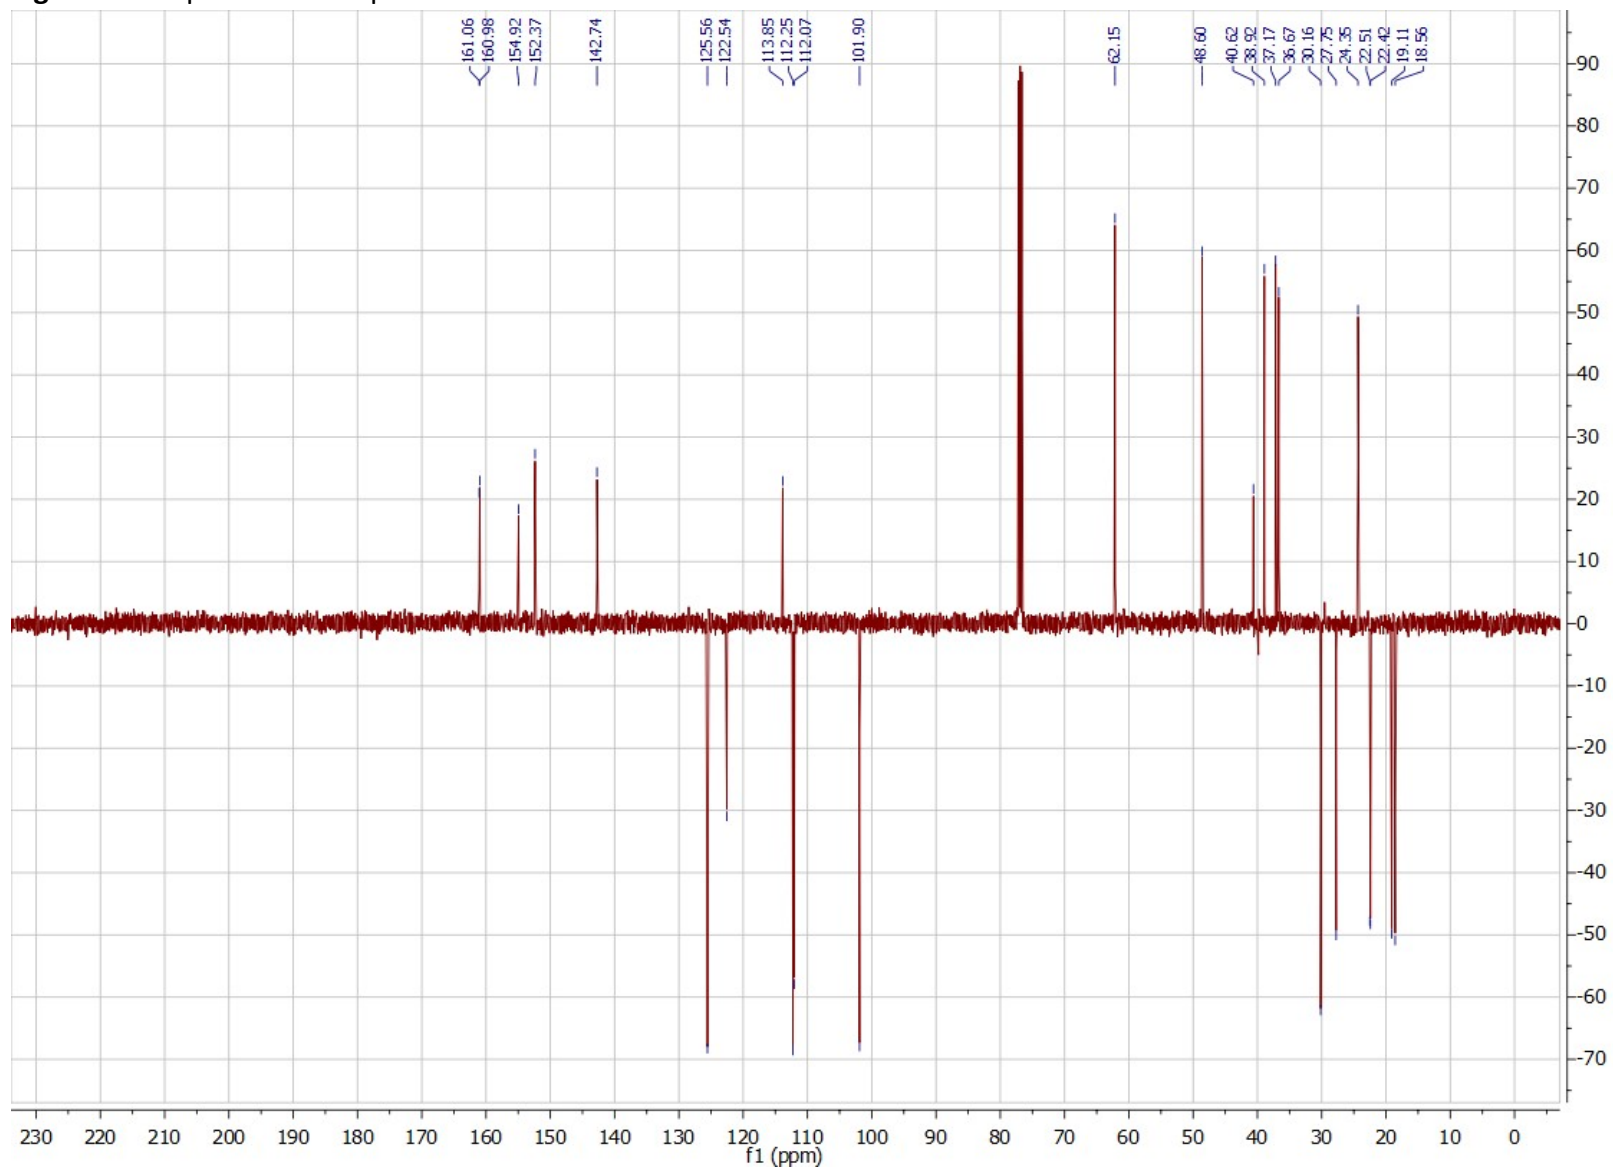

## 2. HRMS spectra of the compounds 10, 19 and 37-55.

**Fig. S37.** HRMS Spectra of the compound **20**.

DO-PEC-CP #4 RT: 0.18 AV: 1 NL: 1.58E6  
T: + c EI Full ms [ 14.50-260.50]

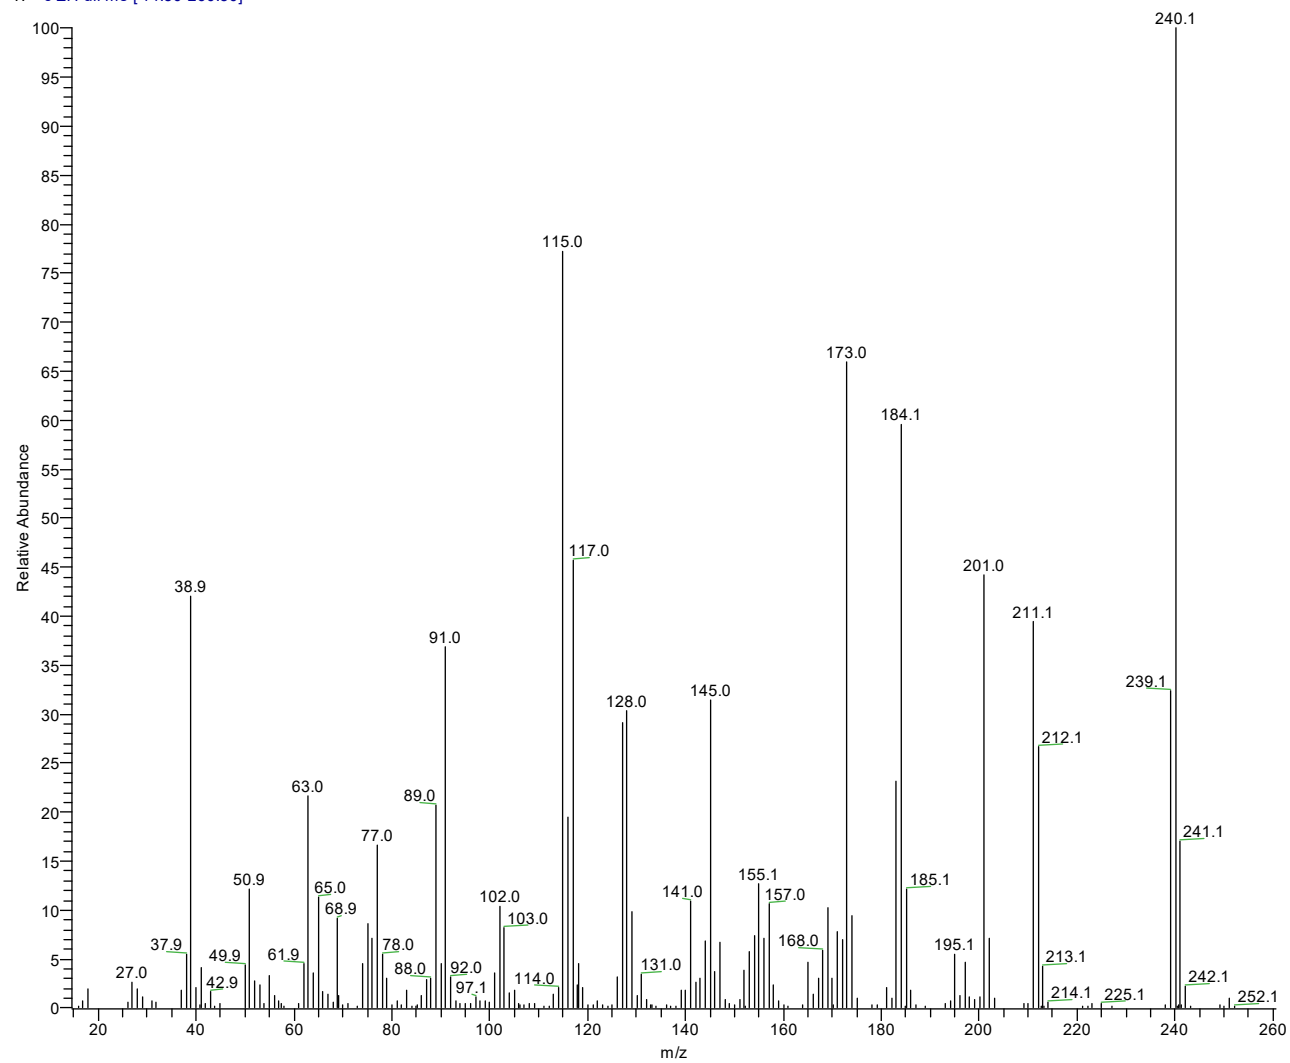

**Fig. S38.** HRMS Spectra of the compound **20**.

DO-CYC7 #5 RT: 0.32 AV: 1 NL: 1.31E7

T: + c EI Full ms [ 14.50-460.50]

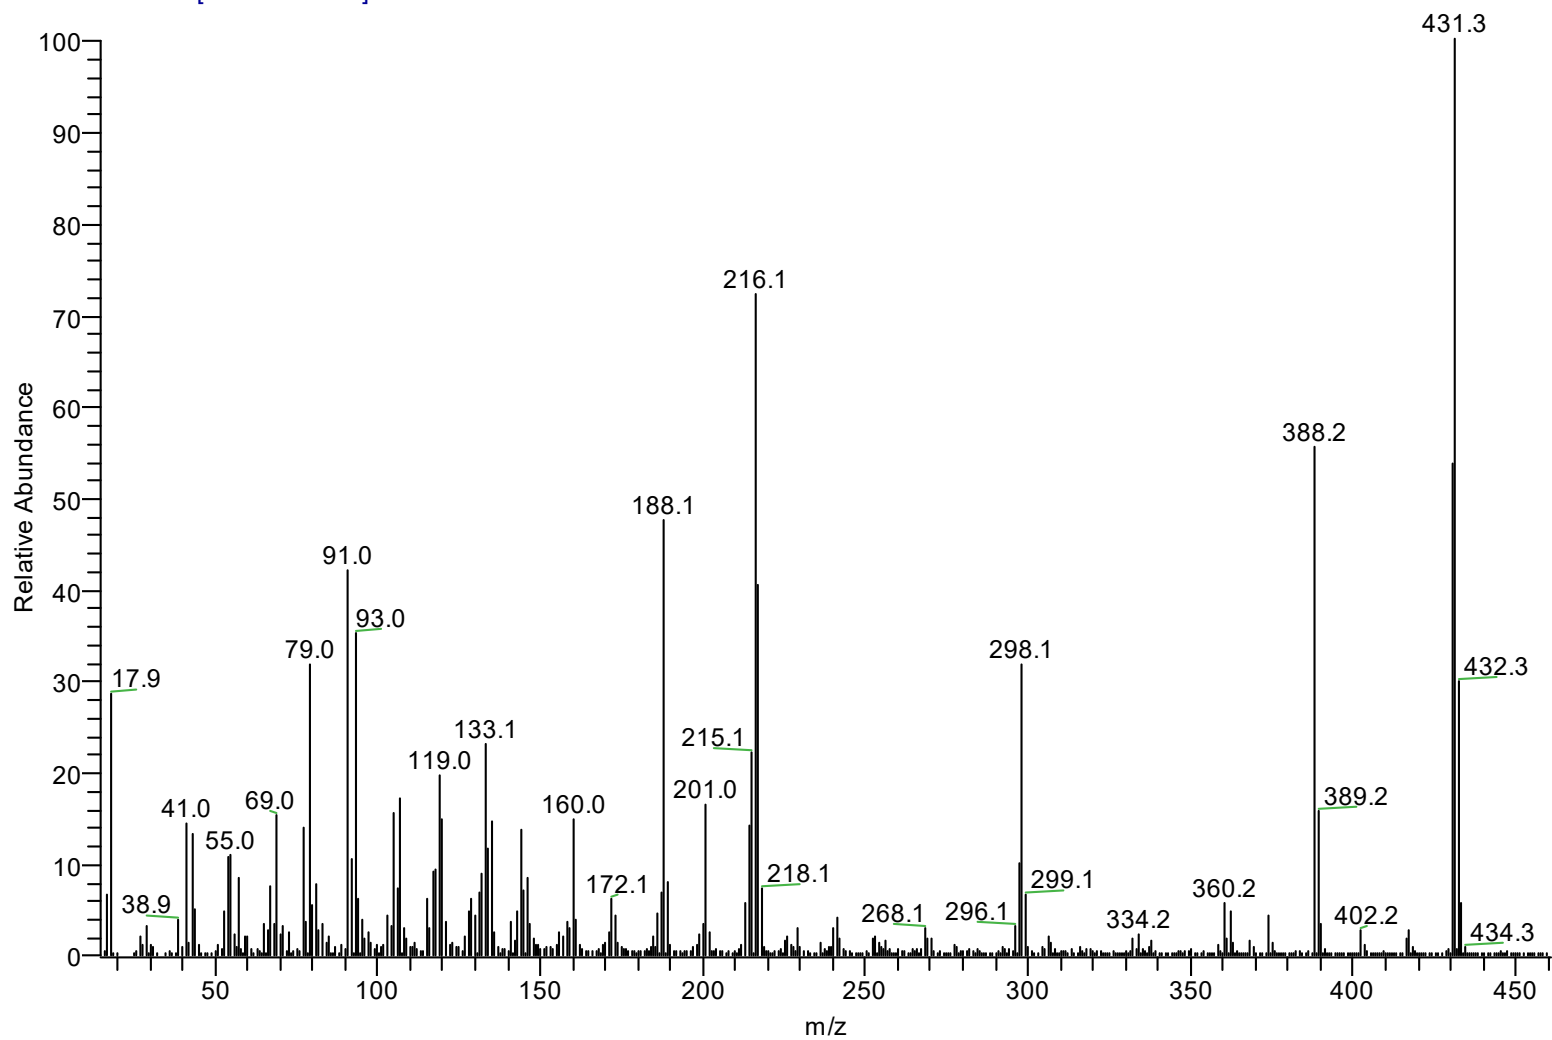

**Fig. S39.** HRMS Spectra of the compound **37**.

Do-cyc-2-2 #3 RT: 0.13 AV: 1 NL: 1.69E5  
T: + c EI Full ms [32.50-460.50]

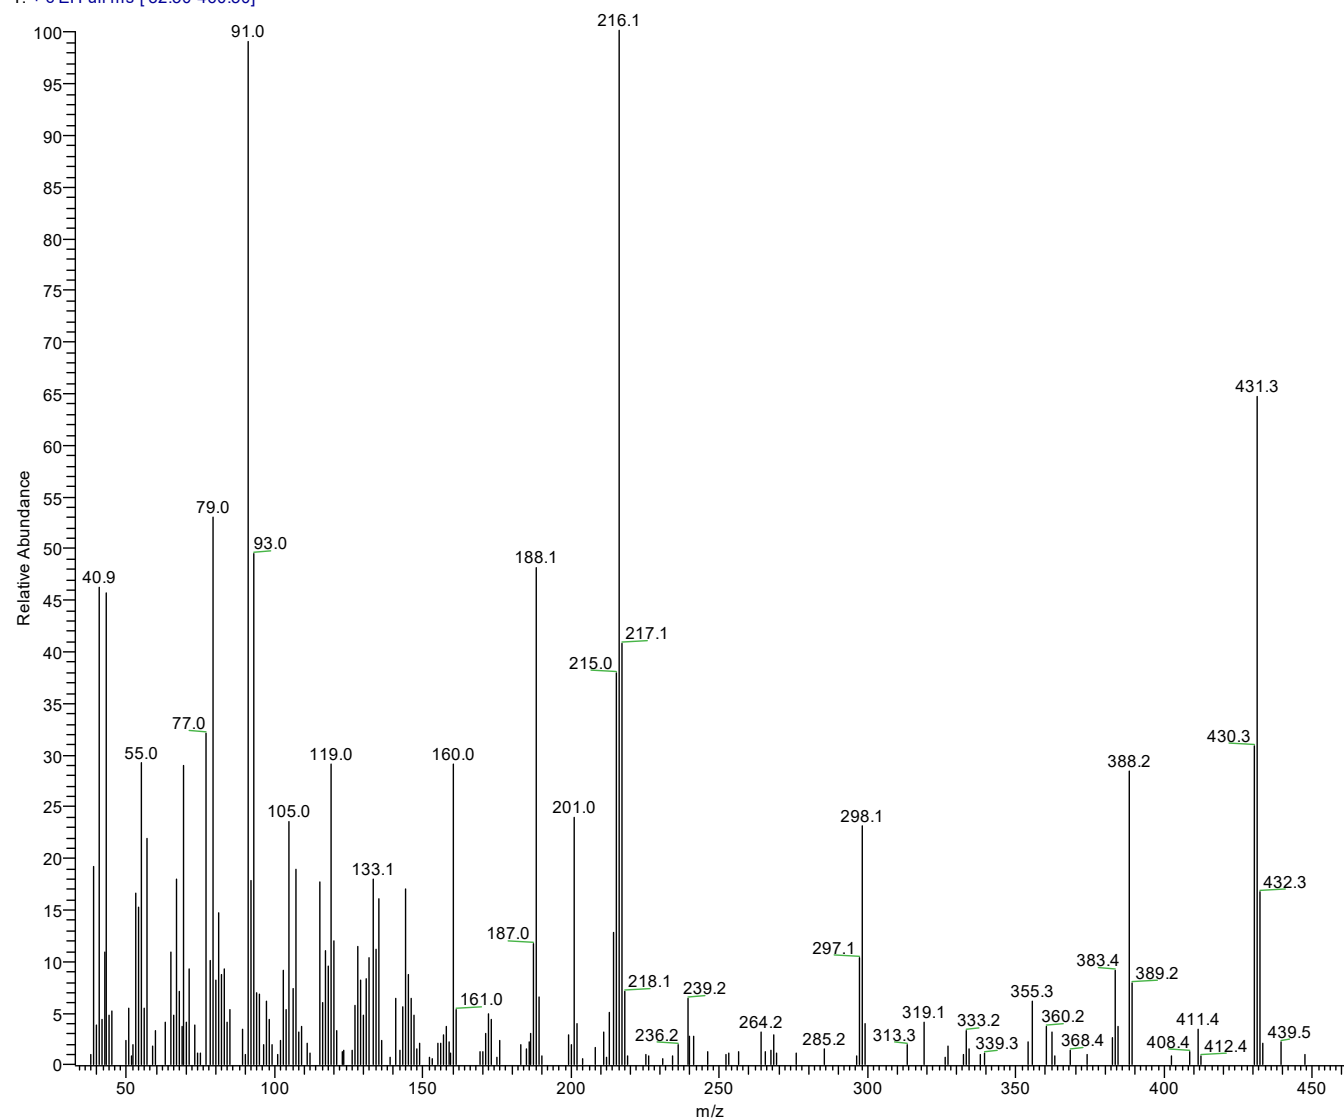

**Fig. S40.** HRMS Spectra of the compound **38**.

DO-CYC-16\_230411140139 #1 RT: 0.00 AV: 1 NL: 7.66E6  
T: + c EI Full ms [32.50-450.50]

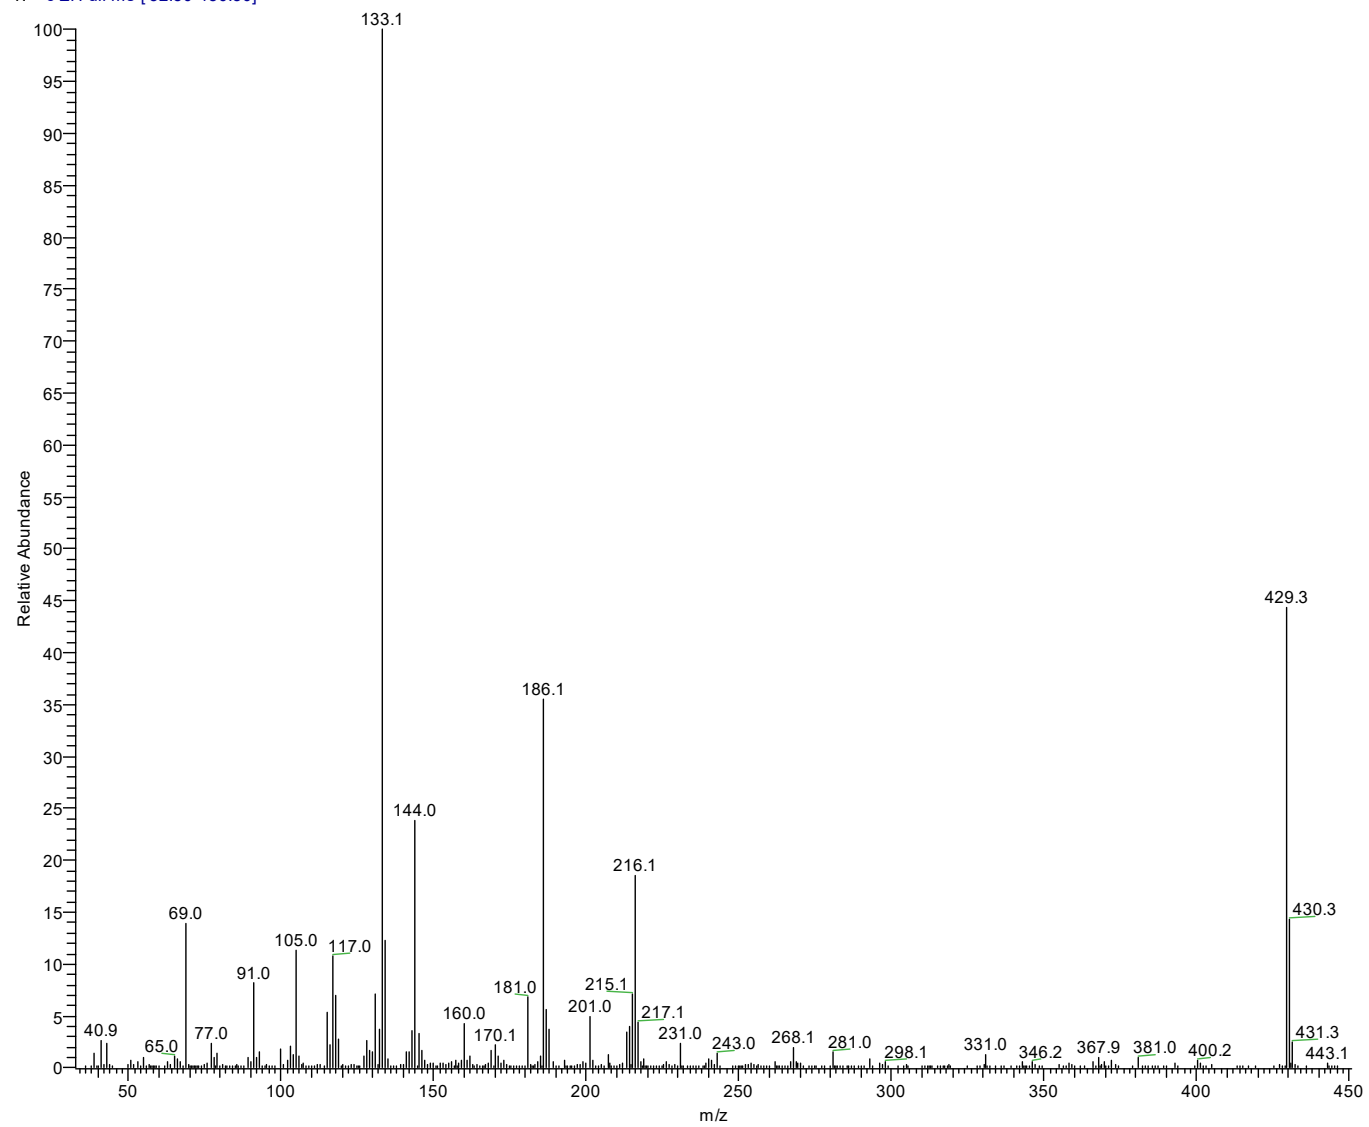

**Fig. S41.** HRMS Spectra of the compound **39**.

DO-CYC-3 #5 RT: 0.32 AV: 1 NL: 1.94E5  
T: + c EI Full ms [ 14.50-460.50]

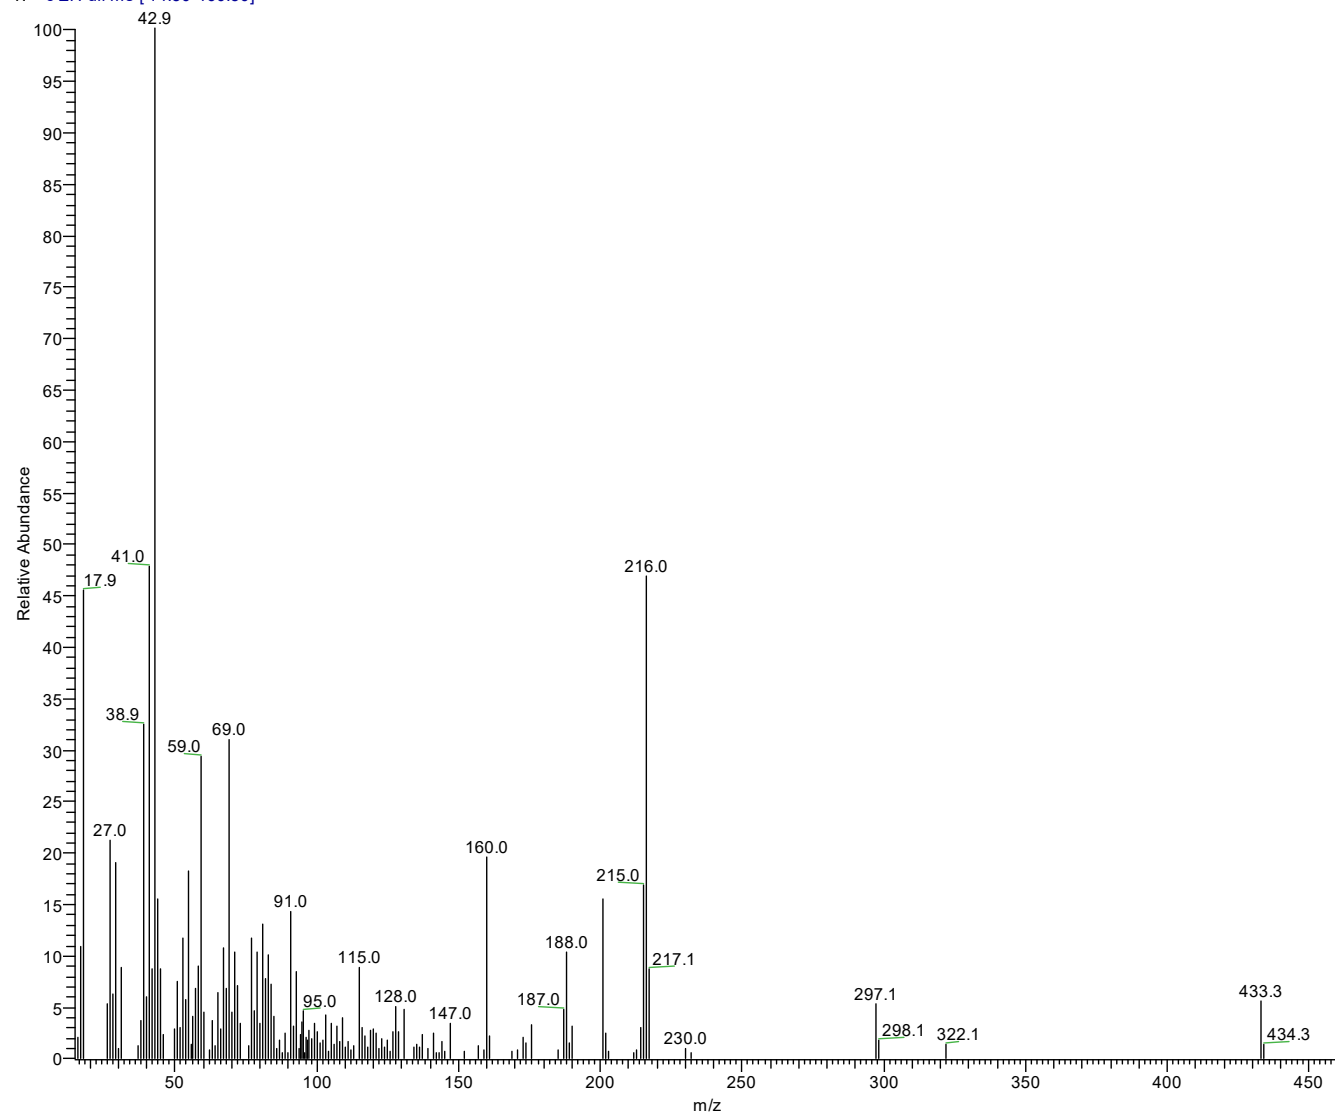

**Fig. S42.** HRMS Spectra of the compound **40**.

DO-CYC-21 #2 RT: 0.07 AV: 1 NL: 3.38E6  
T: + c EI Full ms [32.50-470.50]

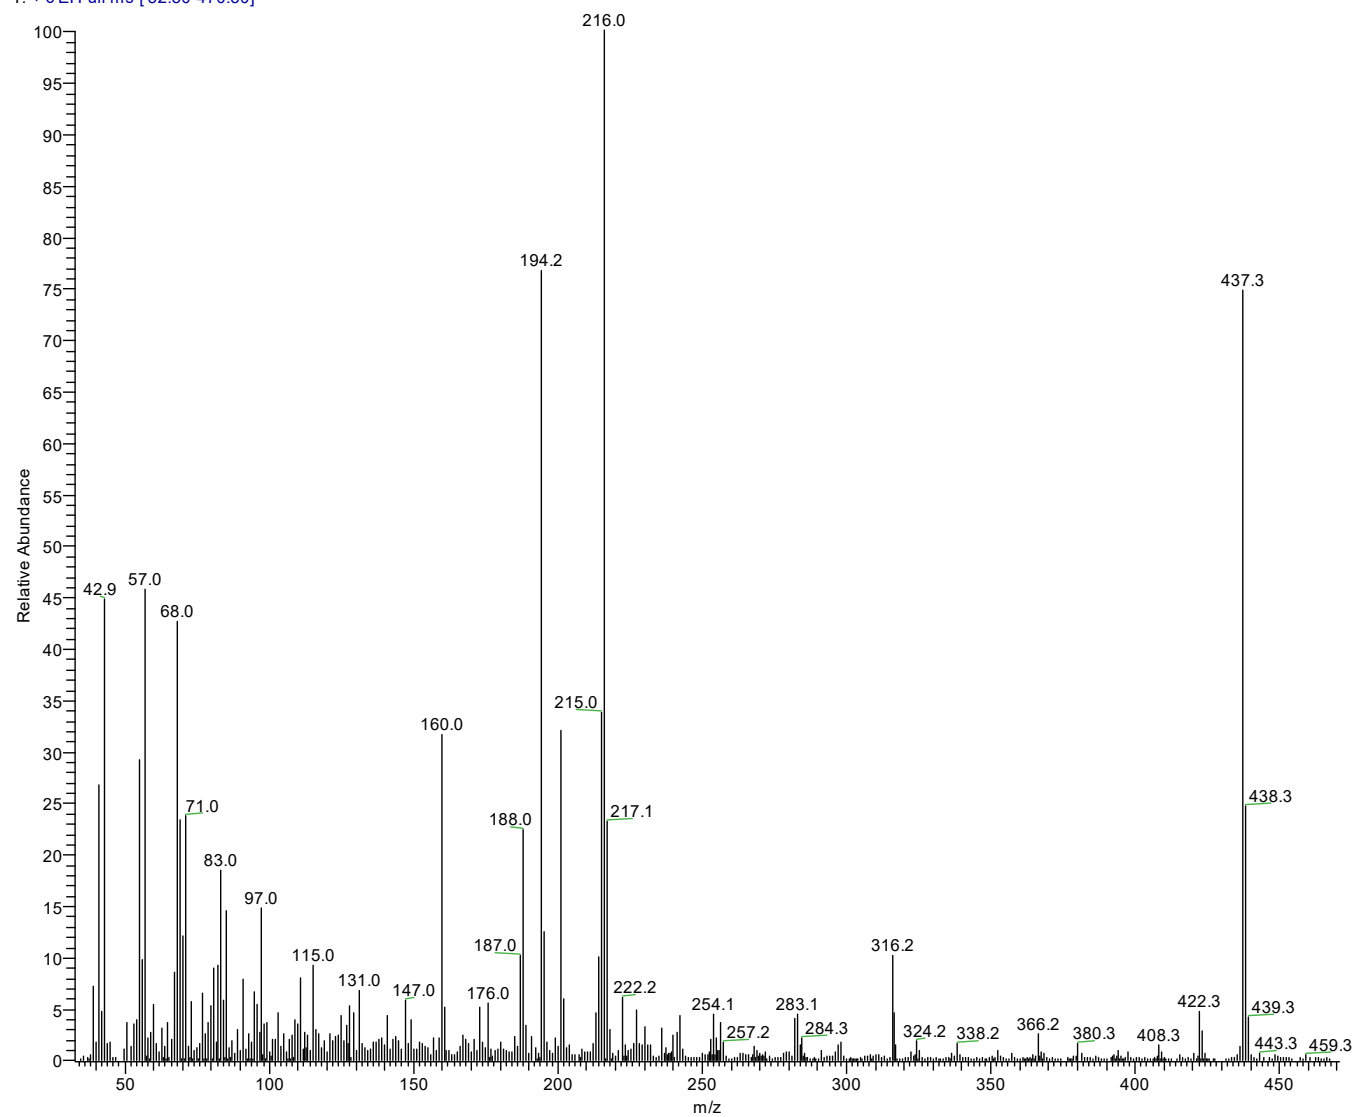

**Fig. S43.** HRMS Spectra of the compound **41**.

DO-CYC-5 #29 RT: 2.13 AV: 1 NL: 8.29E5  
T: + c EI Full ms [14.50-430.50]

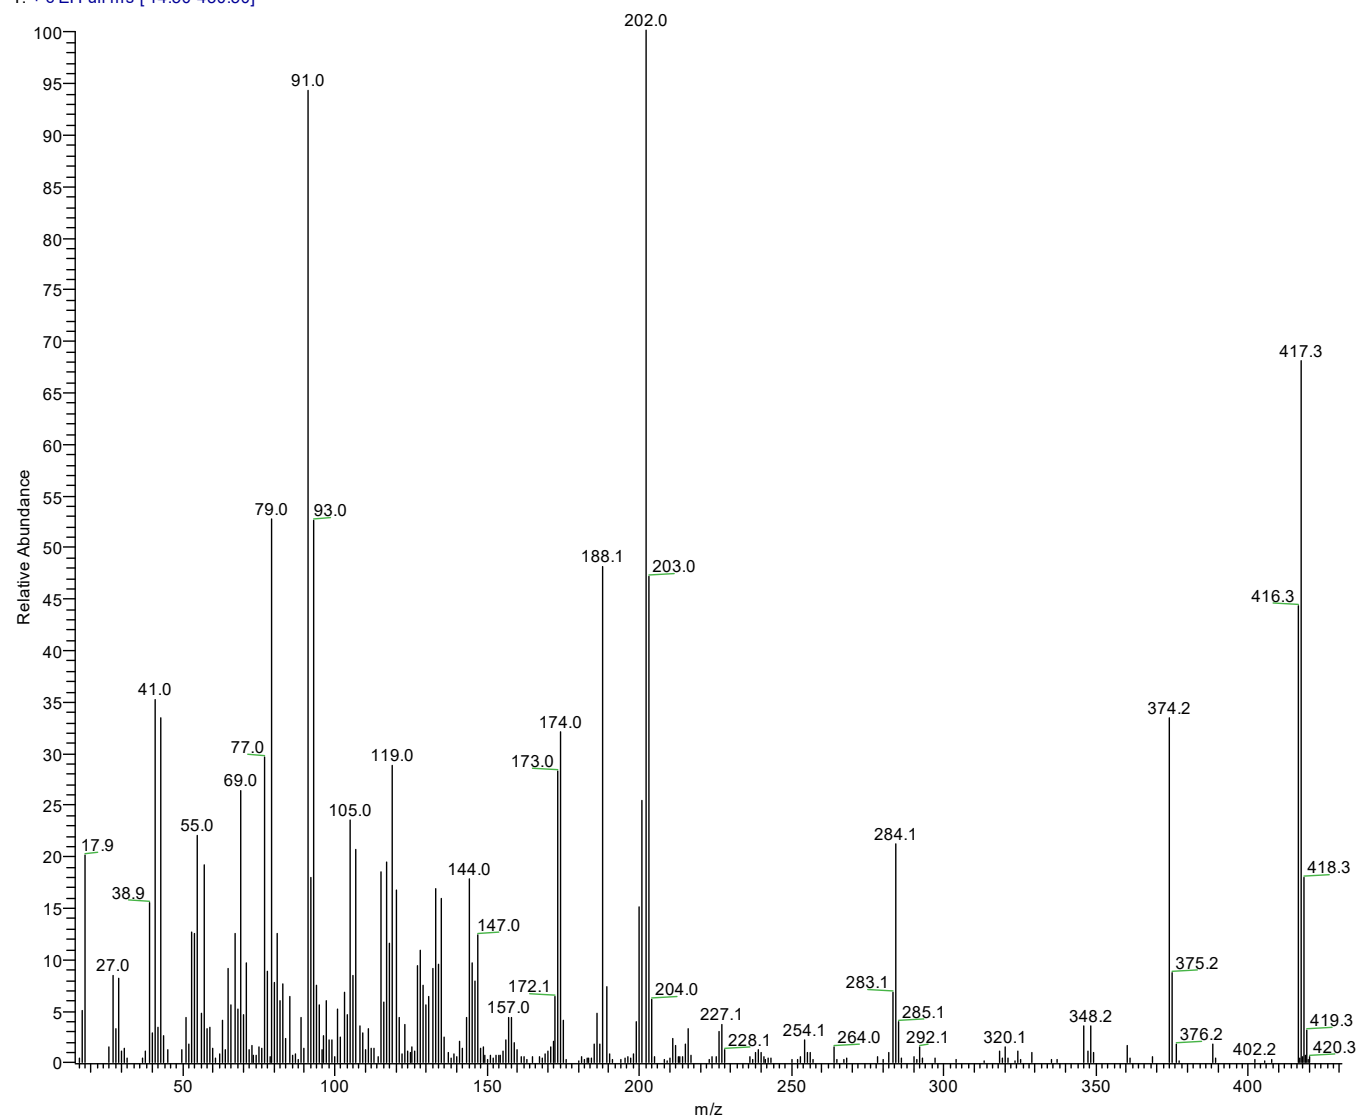



**Fig. S44.** HRMS Spectra of the compound **42**.

DO-CYC-6 #6 RT: 0.31 AV: 1 NL: 5.12E4  
T: + c EI Full ms [32.50-450.50]

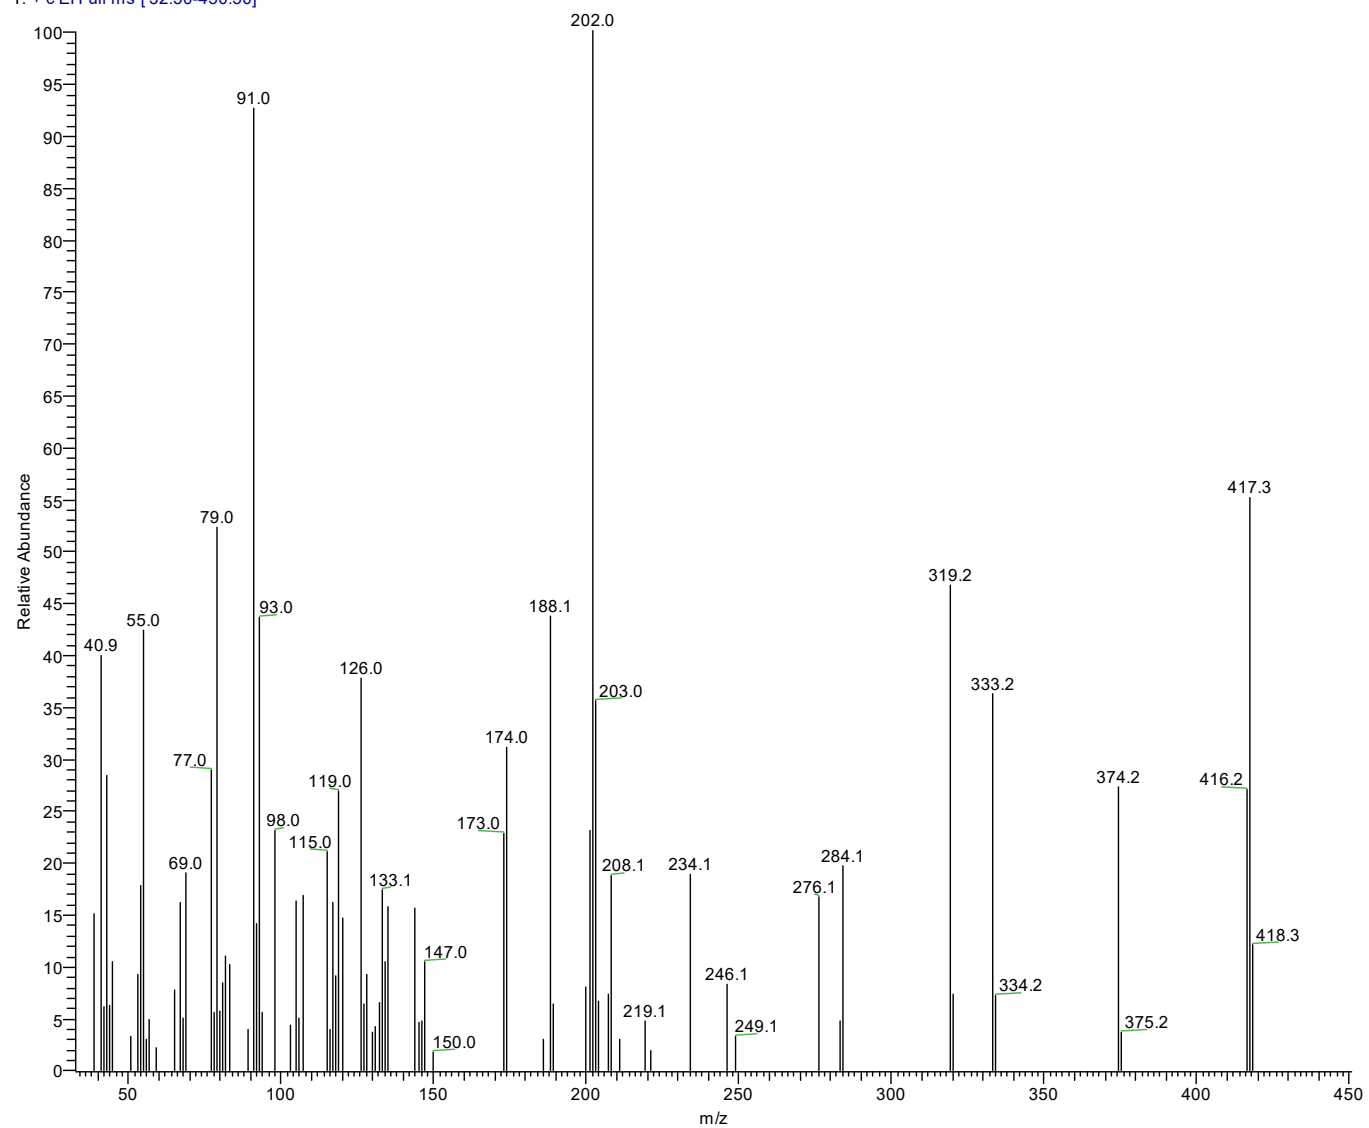

**Fig. S45.** HRMS Spectra of the compound **43**.

DO-CYC-15 #4 RT: 0.19 AV: 1 NL: 8.95E5  
T: + c EI Full ms [32.50-450.50]

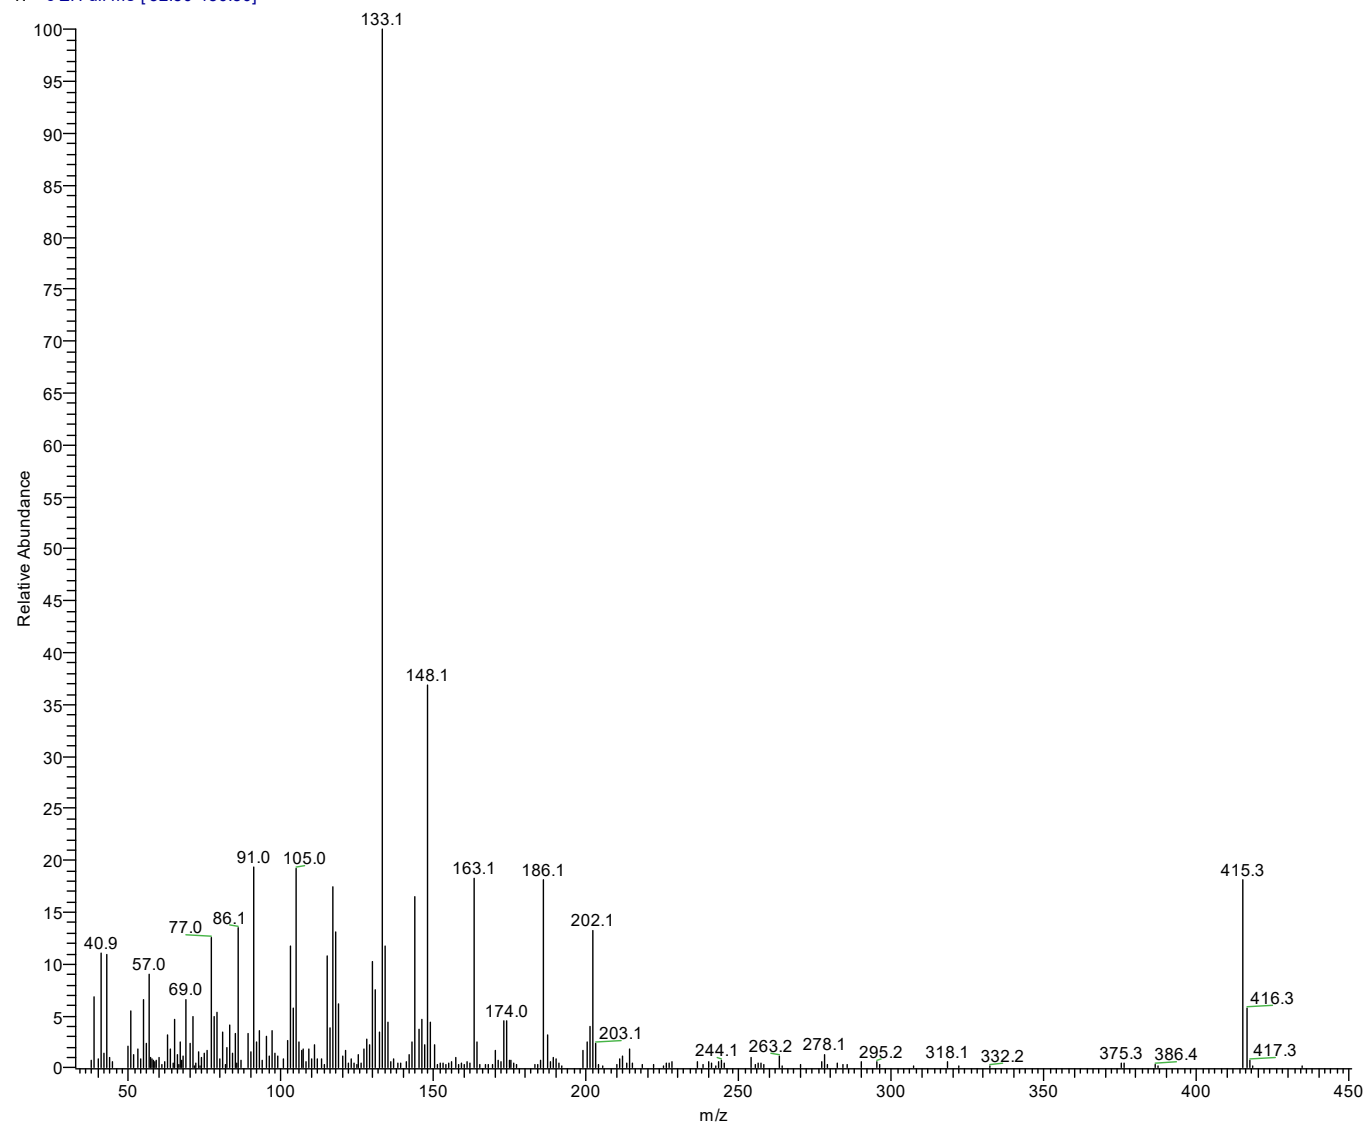

**Fig. S46.** HRMS Spectra of the compound **44**.

DO-CYC-4\_#10 RT: 0.67 AV: 1 NL: 2.71E5  
T: + c EI Full ms [ 14.50-440.50]

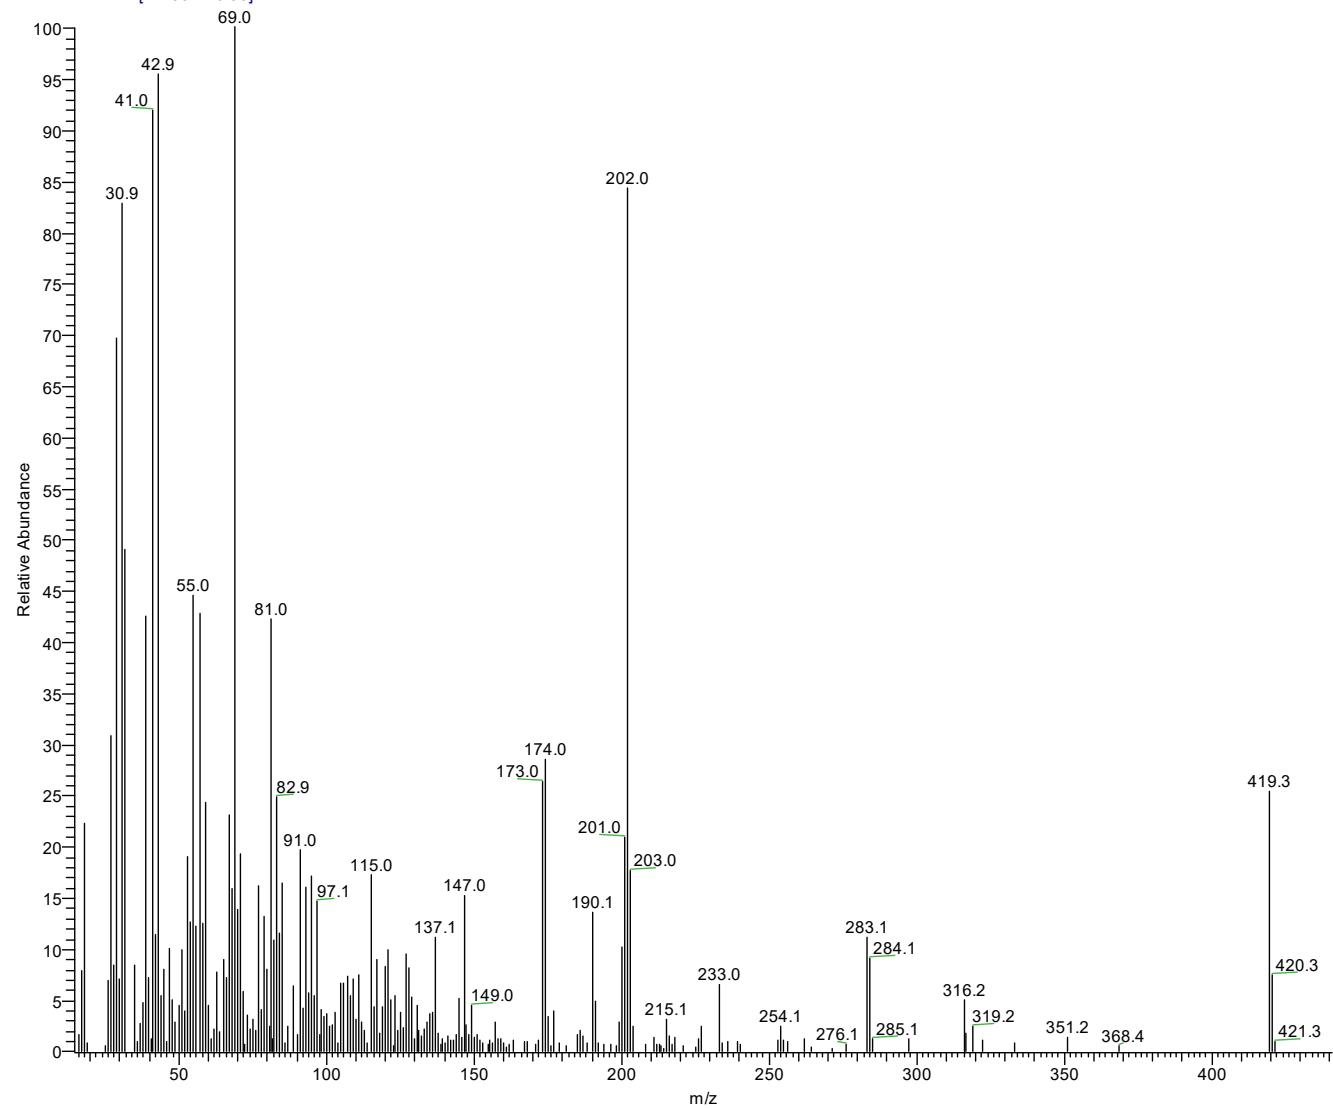

**Fig. S47.** HRMS Spectra of the compound **45**.

DO-CYC-24 #3 RT: 0.16 AV: 1 NL: 4.63E6  
T: + c EI Full ms [ 14.50-430.50]

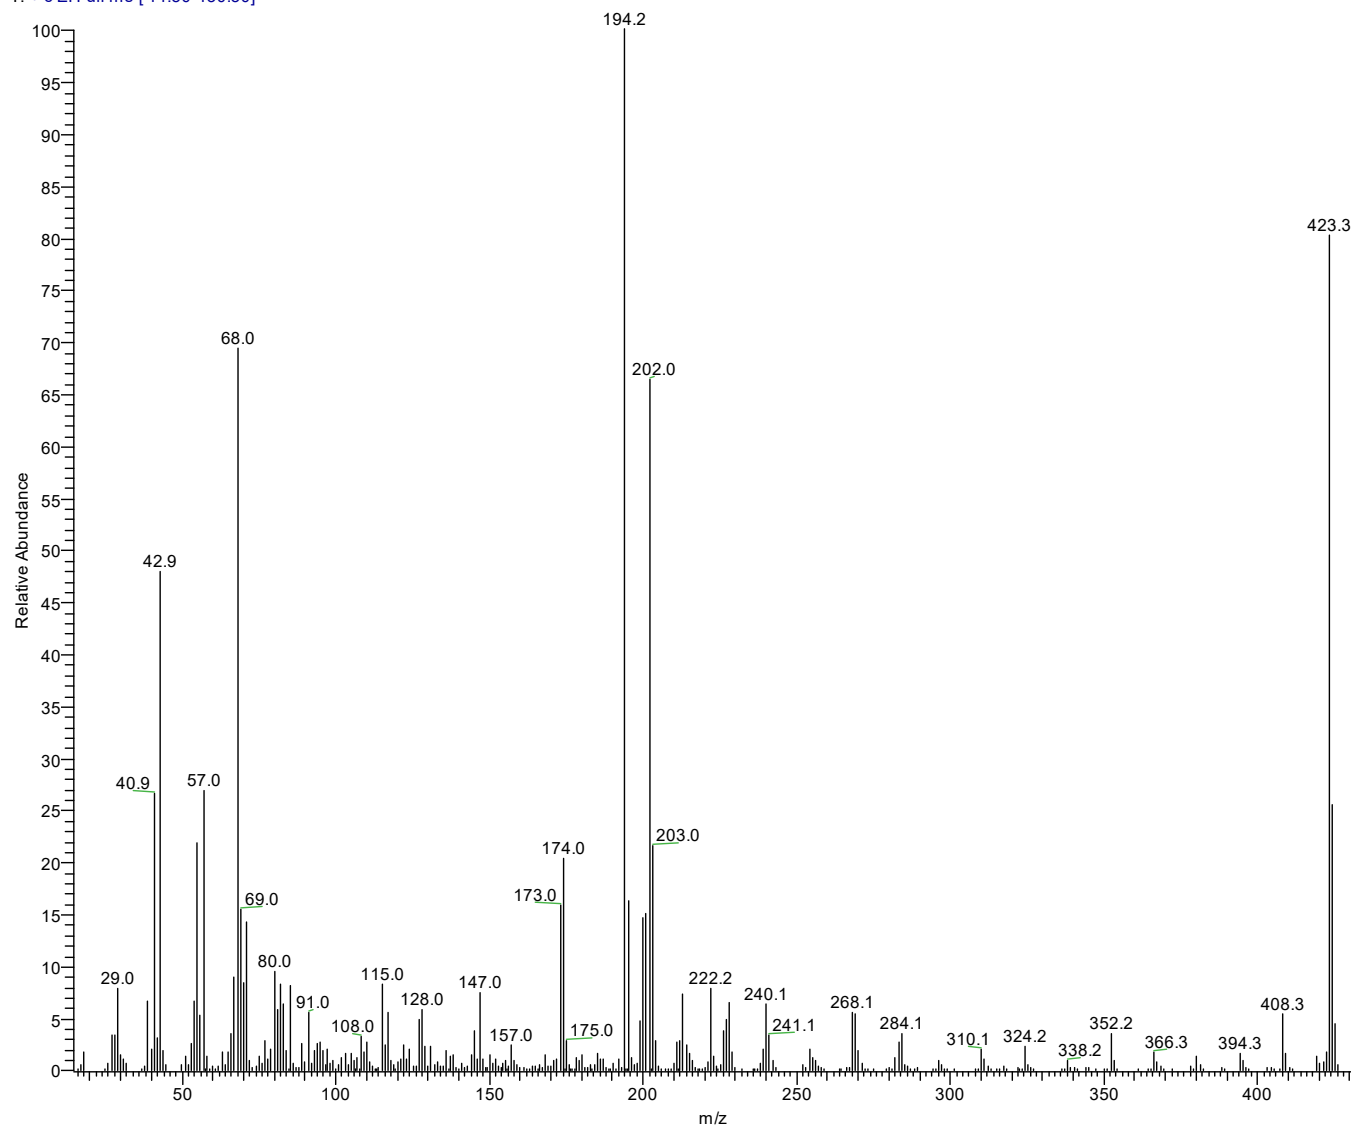

**Fig. S48.** HRMS Spectra of the compound **46**.

DO-CYC-10\_230330142051 #12 RT: 0.88 AV: 1 NL: 9.23E4  
T: + c EI Full ms [14.50-470.50]

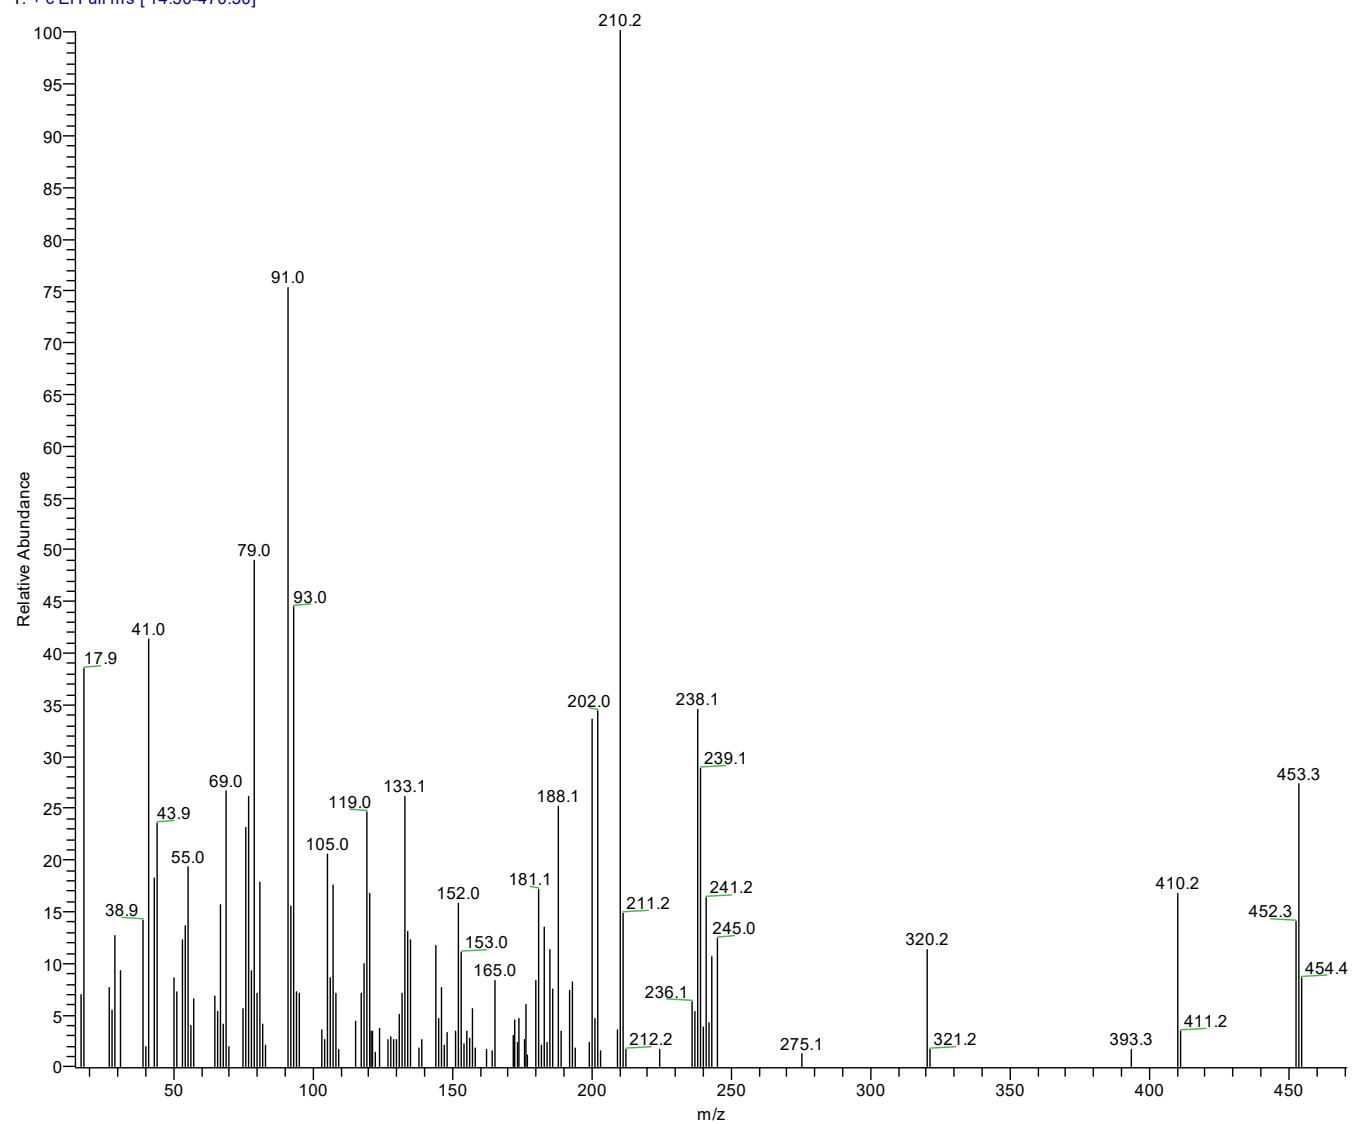

**Fig. S49.** HRMS Spectra of the compound **47**.

DO-CYC-9 #3 RT: 0.16 AV: 1 NL: 3.04E4  
T: + c EI Full ms [14.50-480.50]

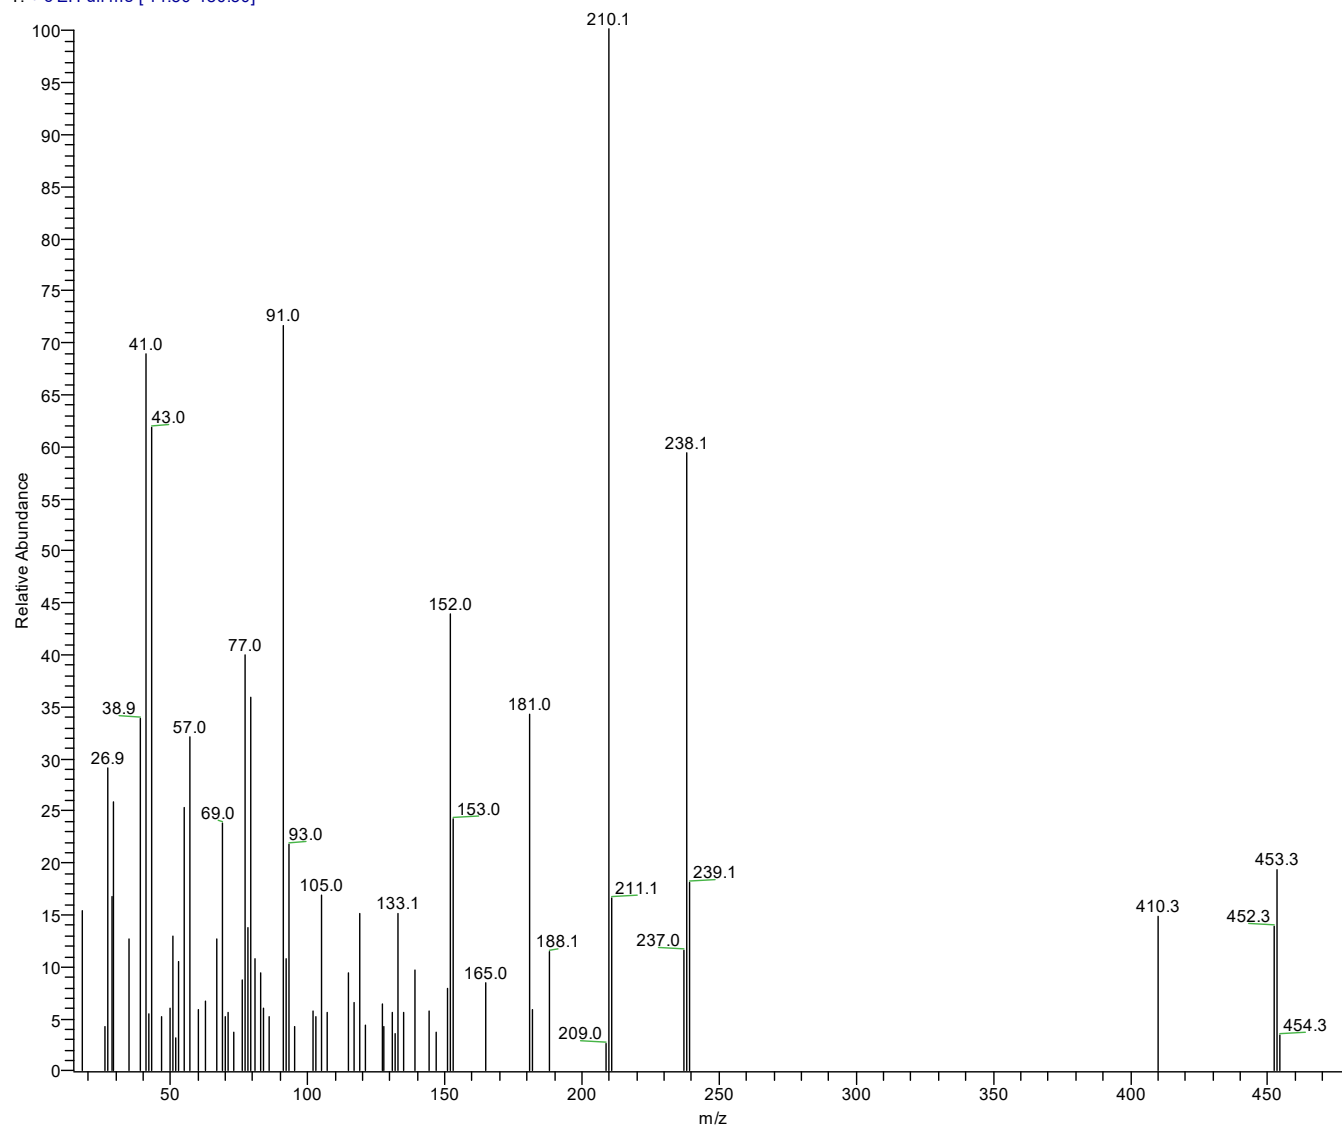

**Fig. S50.** HRMS Spectra of the compound **48**.

DO-CYC-18 #3 RT: 0.16 AV: 1 NL: 1.89E6  
T: + c EI Full ms [14.50-480.50]

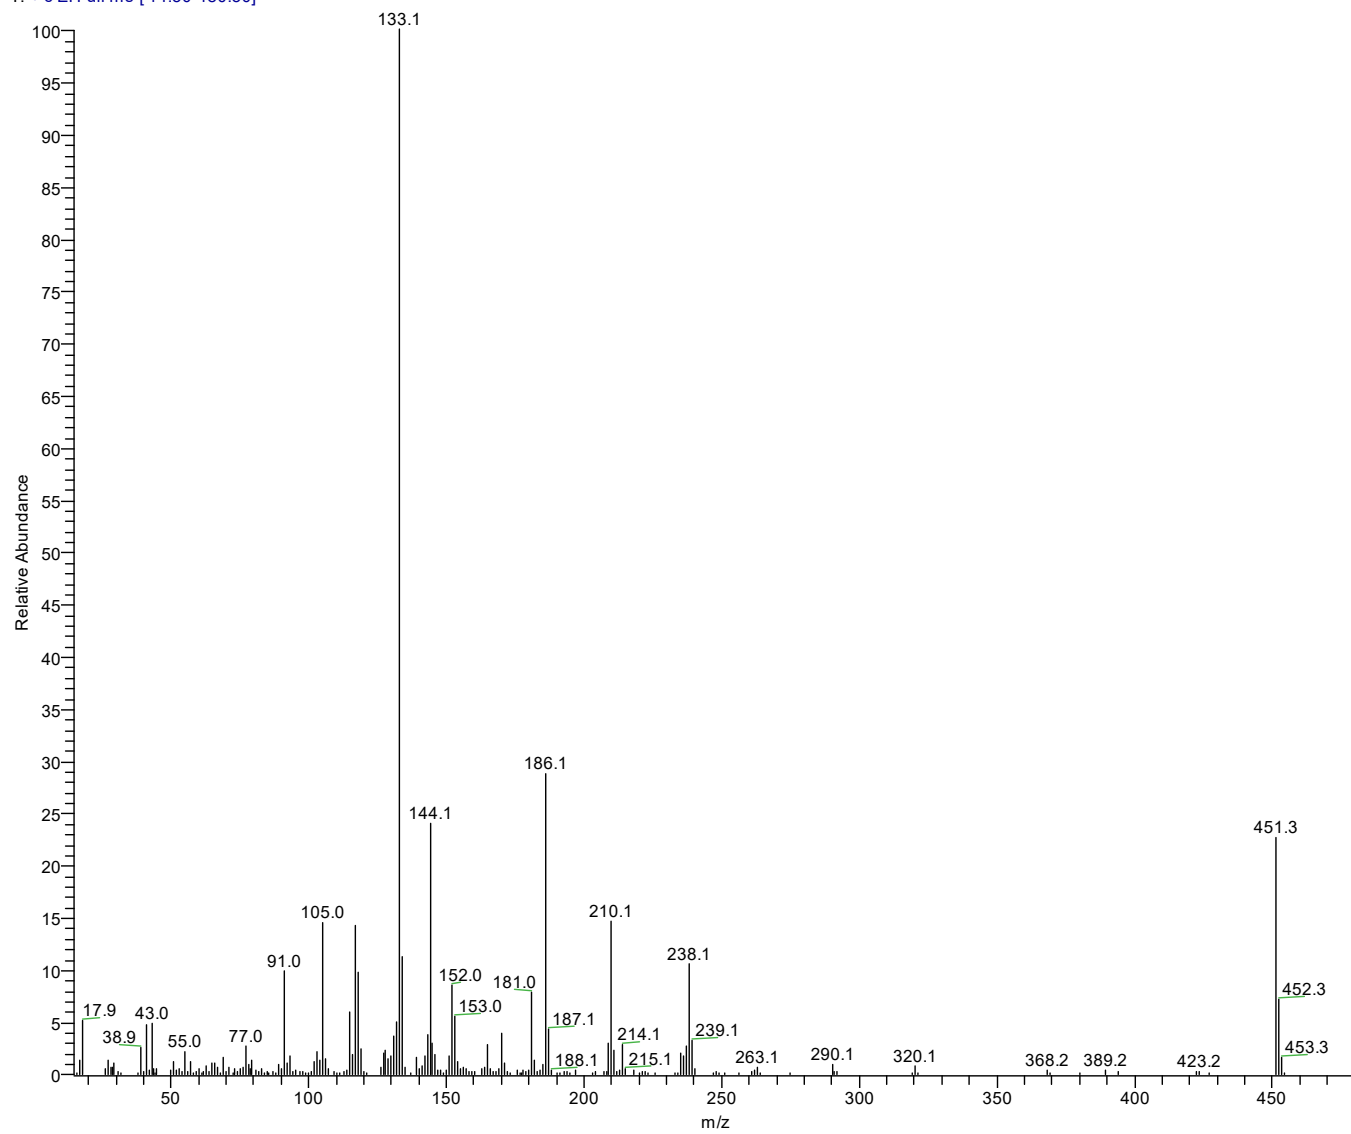

**Fig. S51.** HRMS Spectra of the compound **49**.

DO-CYC-8 #8 RT: 0.44 AV: 1 NL: 4.32E5  
T: + c EI Full ms [32.50-480.50]

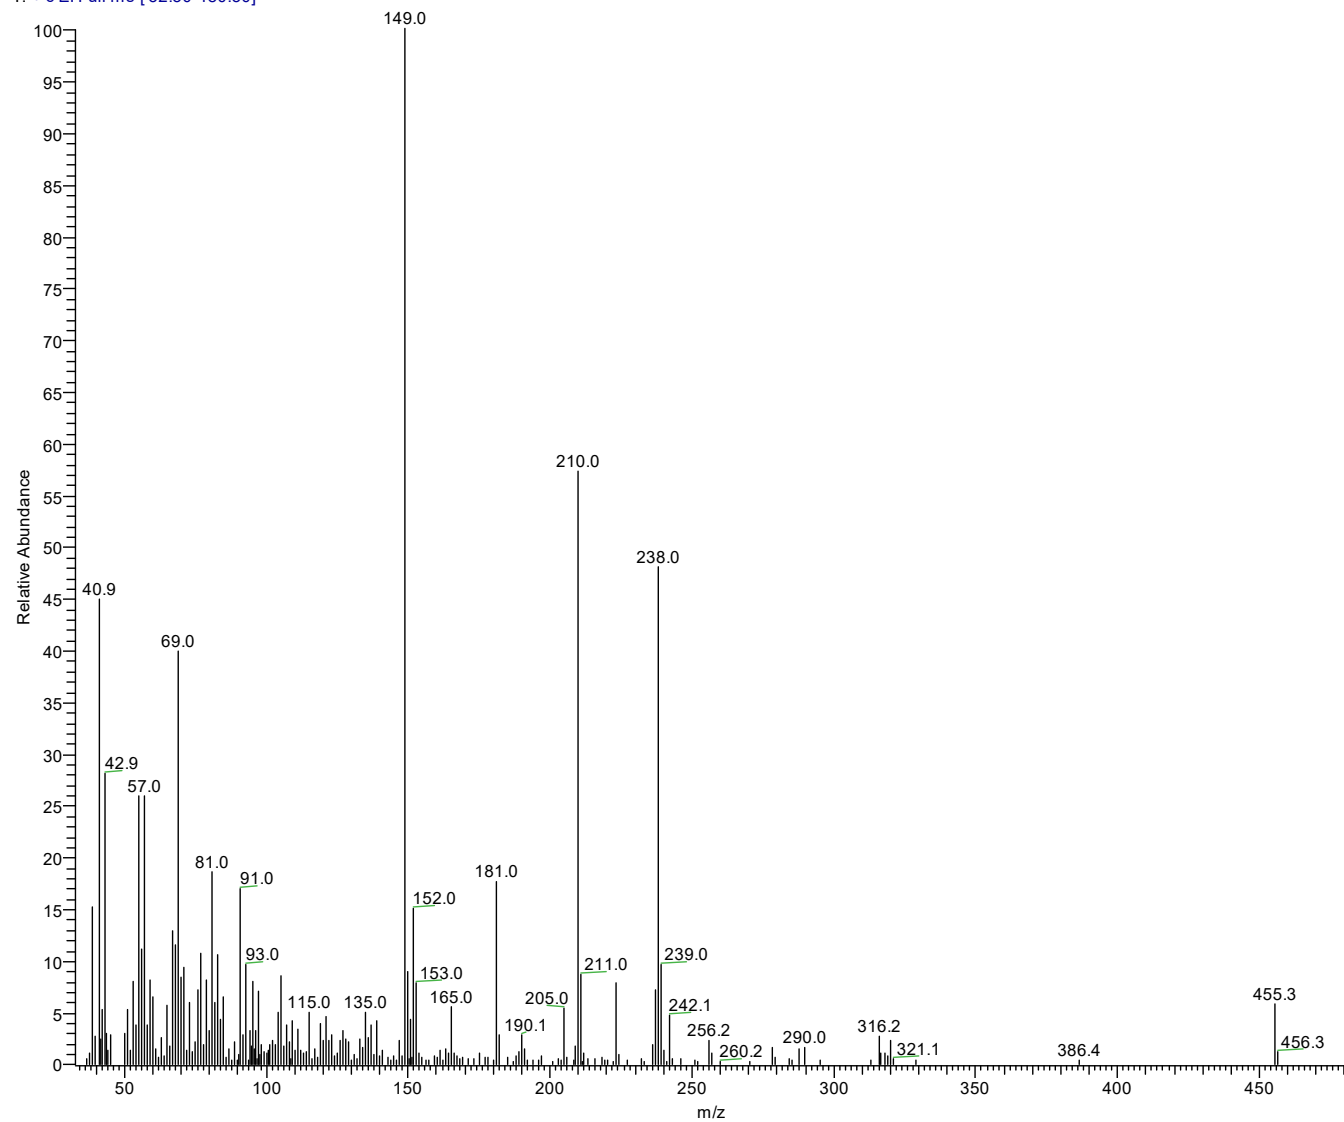



**Fig. S52.** HRMS Spectra of the compound **50**.

DO-CYC-23 #5 RT: 0.26 AV: 1 NL: 6.52E6  
T: + c EI Full ms [32.50-500.50]

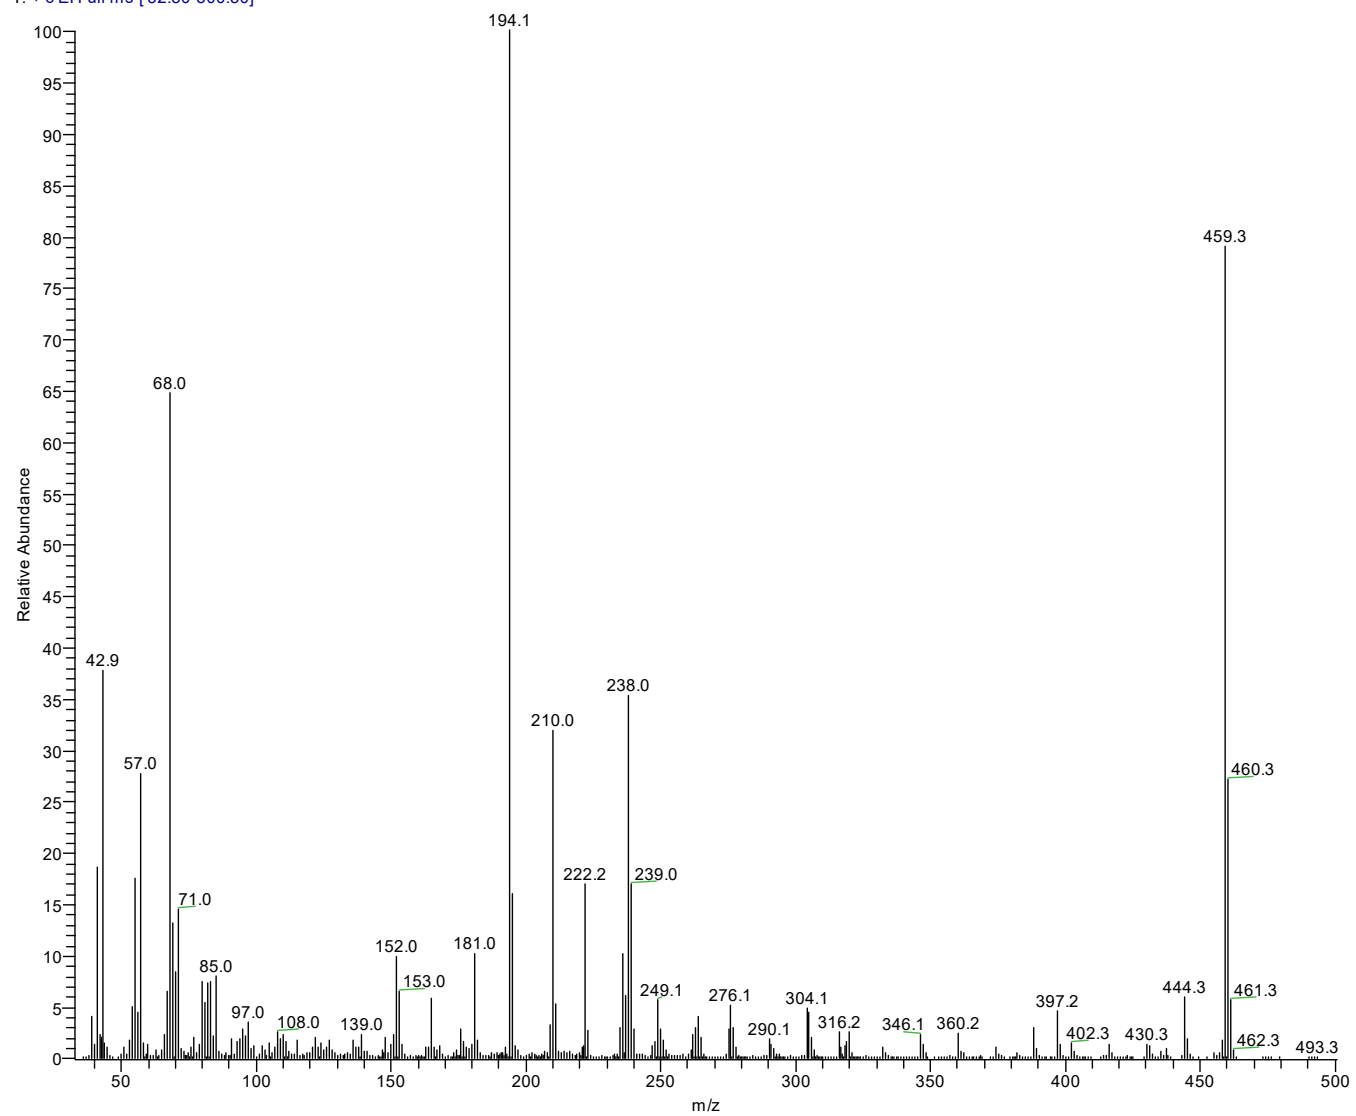

**Fig. S53.** HRMS Spectra of the compound **51**.

DO-CYC-20 #1 RT: 0.00 AV: 1 NL: 7.29E5  
T: + c EI Full ms [14.50-400.50]

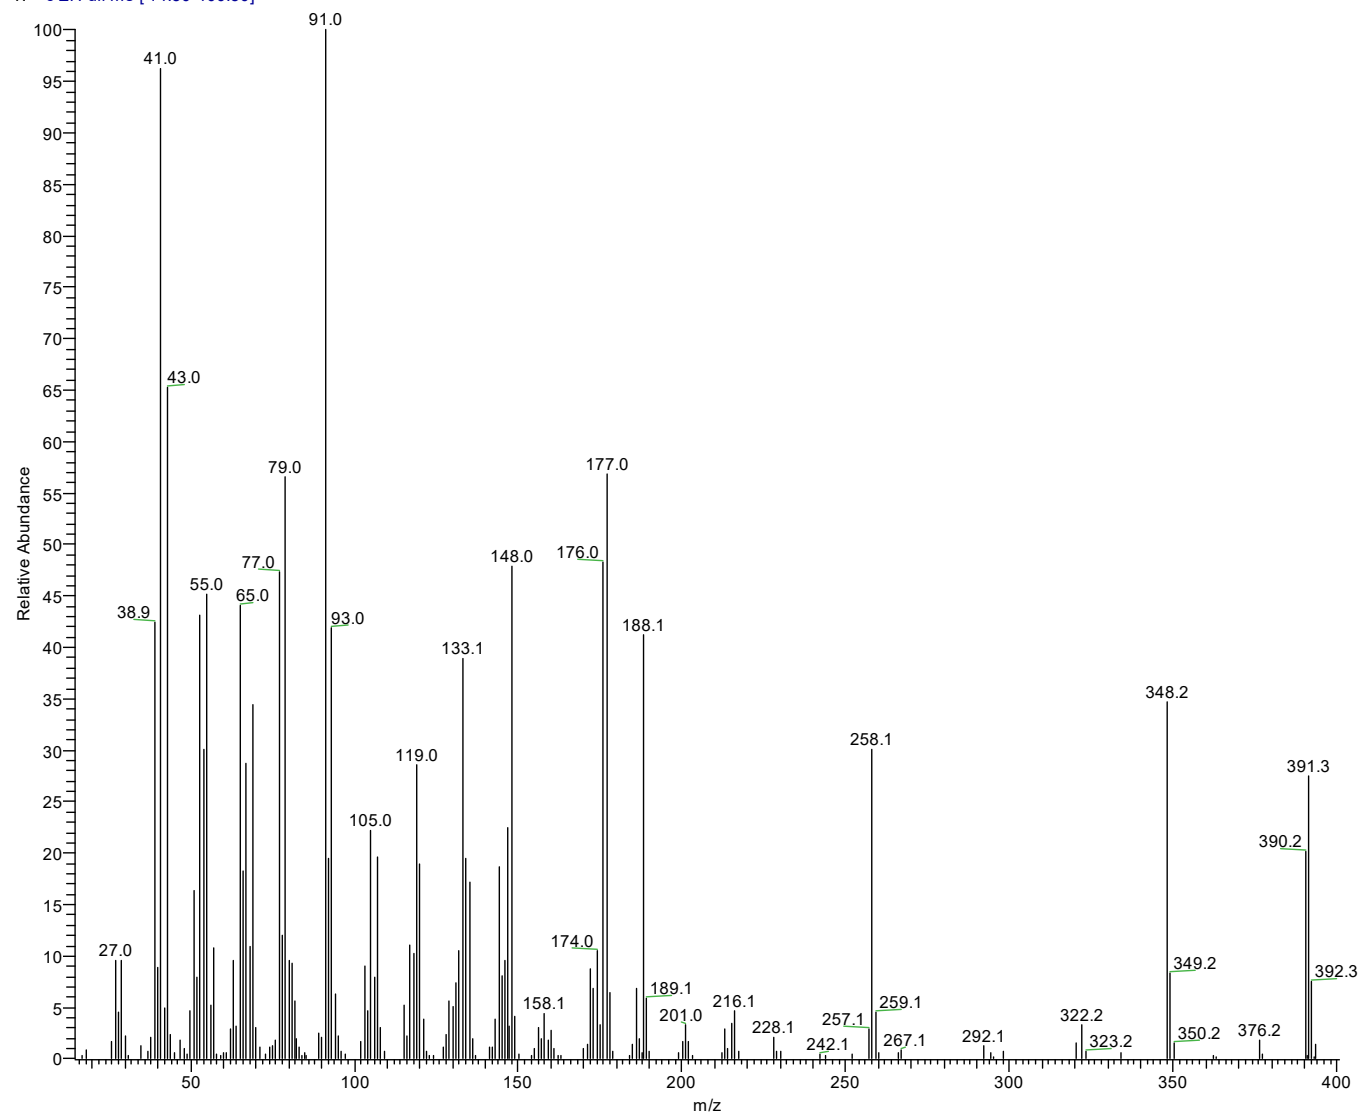

**Fig. S54.** HRMS Spectra of the compound **52**.

DO-CYC12 #10 RT: 0.70 AV: 1 NL: 7.30E6  
T: + c EI Full ms [32.50-430.50]

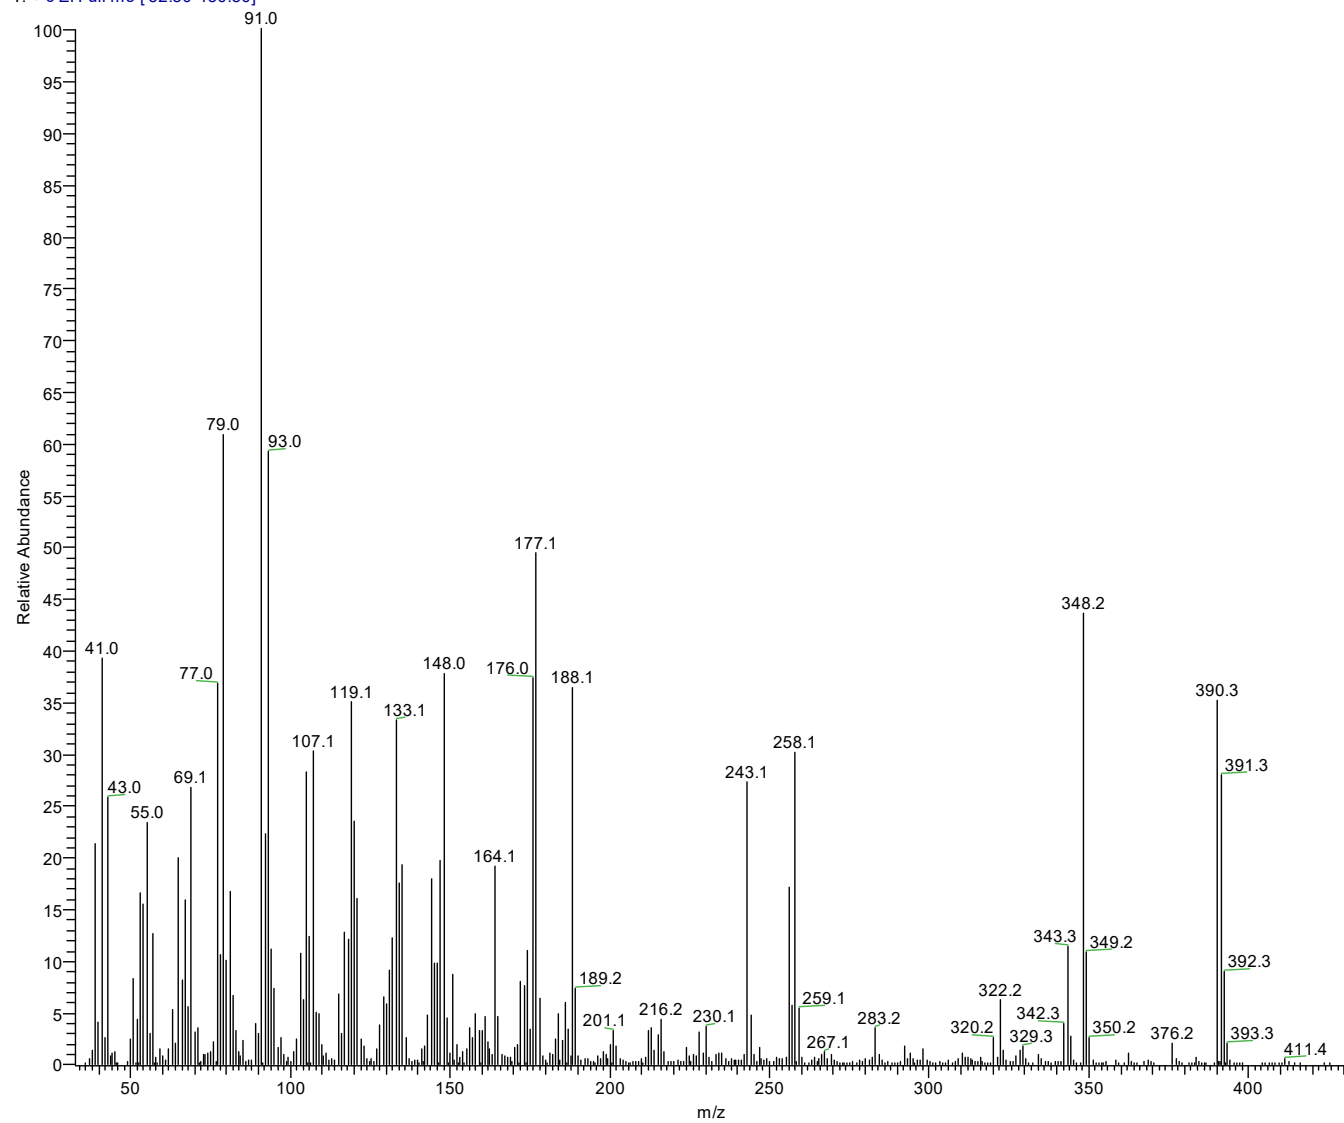

**Fig. S55.** HRMS Spectra of the compound **53**.

DO-CYC-17\_230408142605 #3 RT: 0.16 AV: 1 NL: 8.93E6  
T: + c EI Full ms [14.50-420.50]

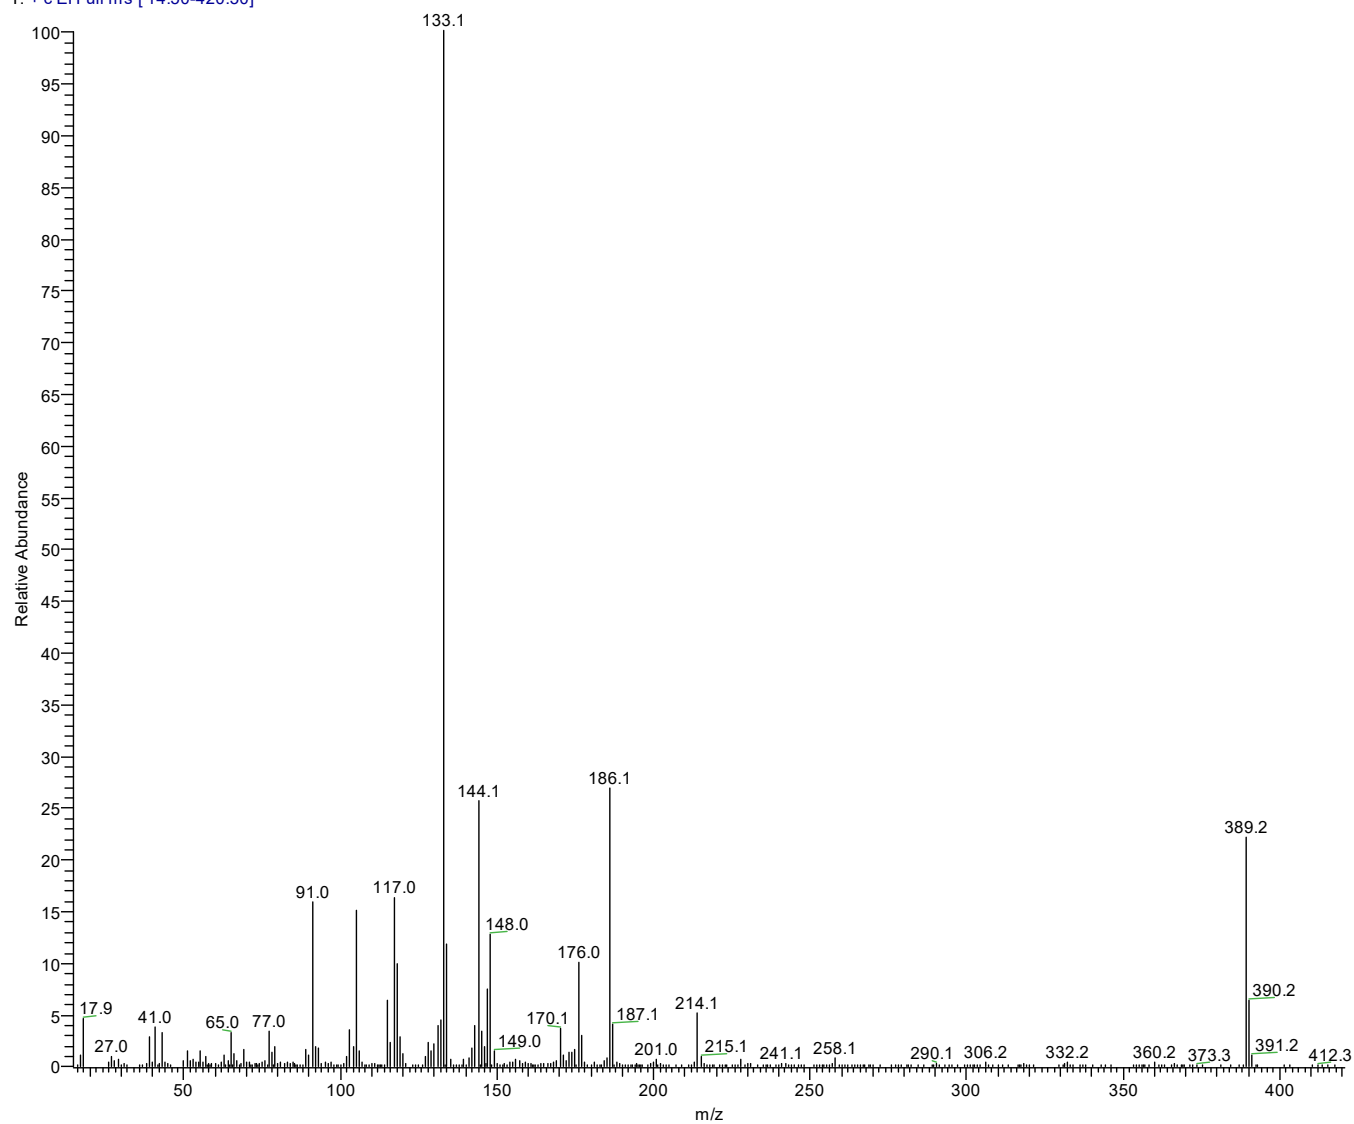

**Fig. S56.** HRMS Spectra of the compound **54-E**.

DO-CYC11-I-2 #2 RT: 0.08 AV: 1 NL: 3.29E5  
T: + c EI Full ms [14.50-420.50]

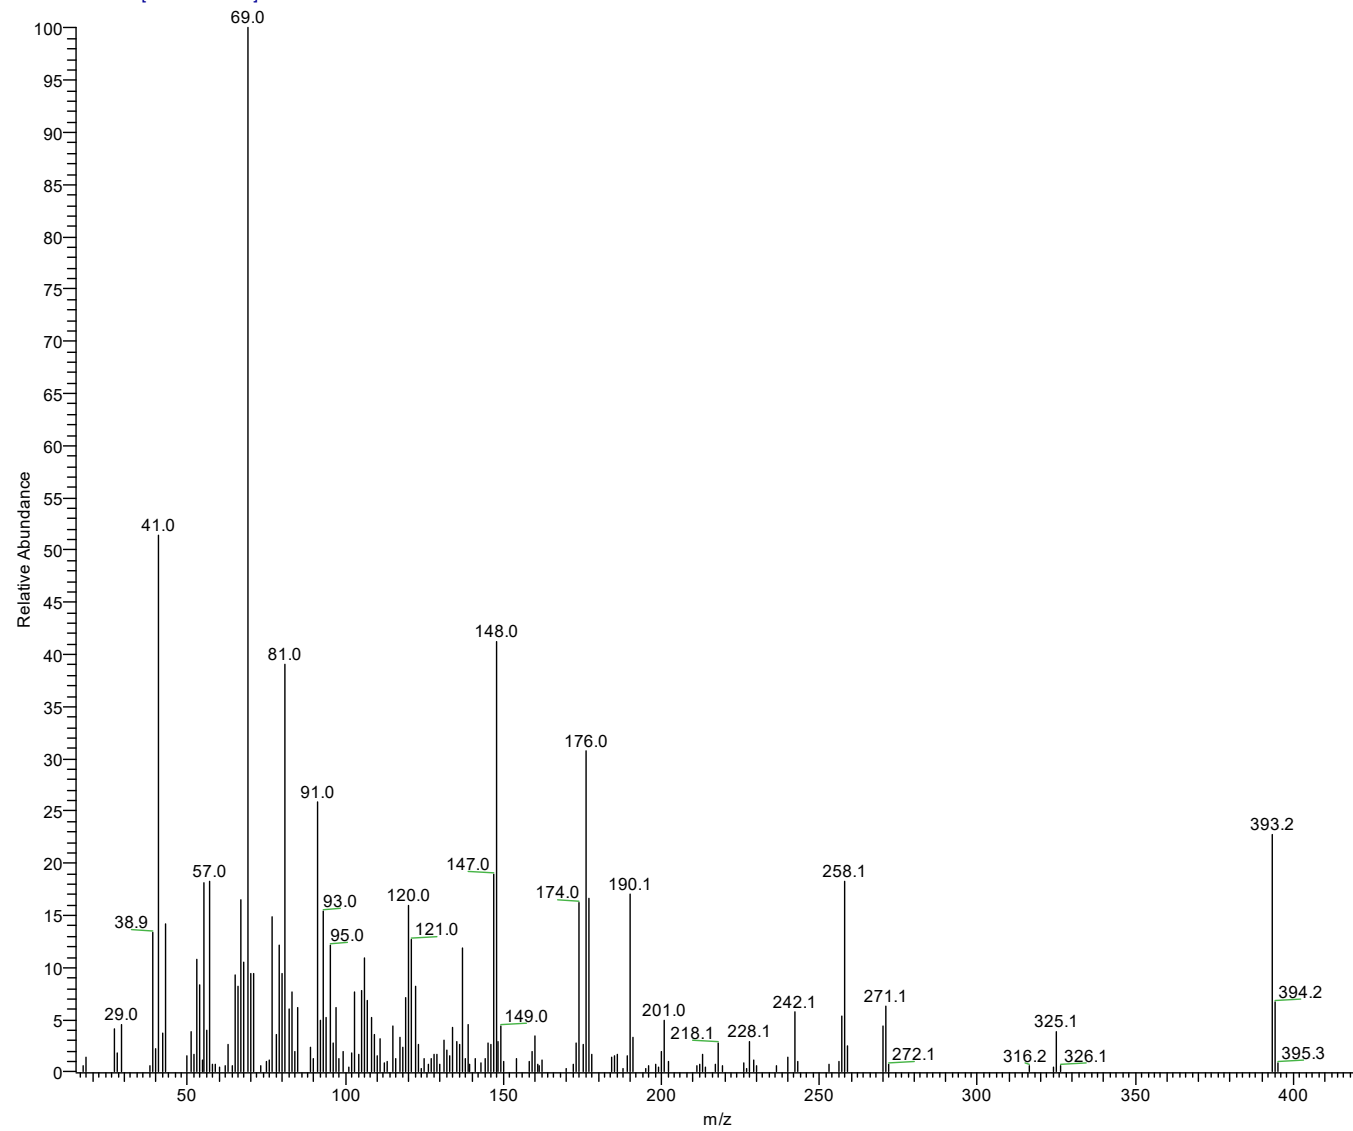

**Fig. S57.** HRMS Spectra of the compound **54-Z**.

DO-CYC-11-11 #17 RT: 0.96 AV: 1 NL: 9.63E4  
T: + c EI Full ms [32.50-420.50]

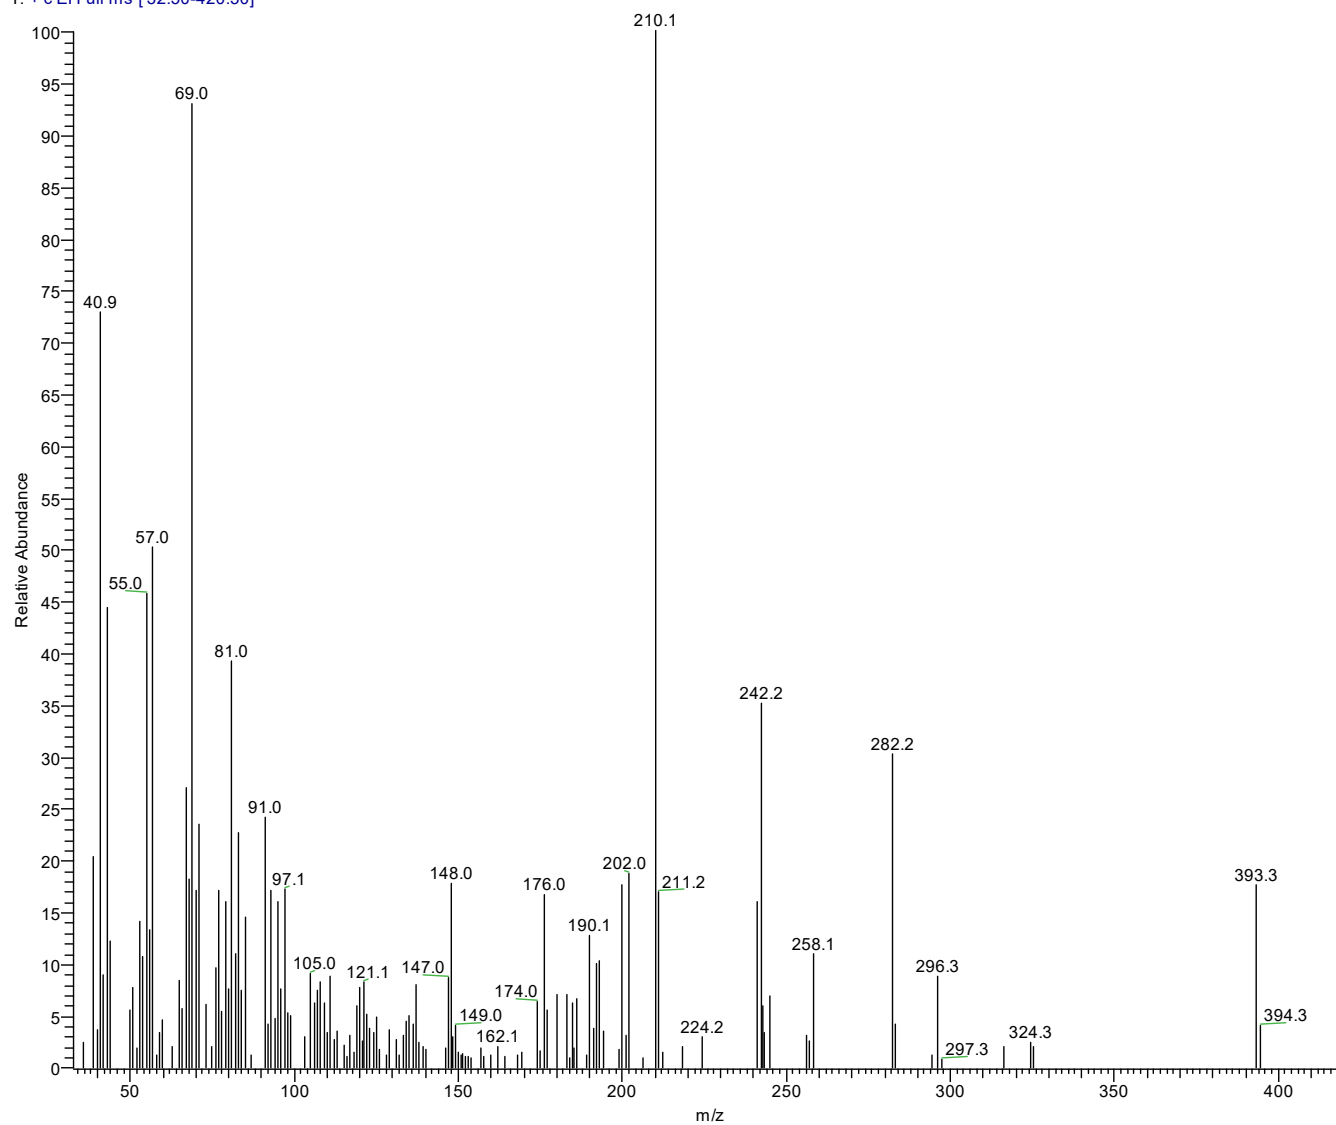

**Fig. S58.** HRMS Spectra of the compound **55**.

DO\_CYC\_22 #10 RT: 0.71 AV: 1 NL: 1.56E7  
T: + c EI Full ms [ 14.50-450.50]

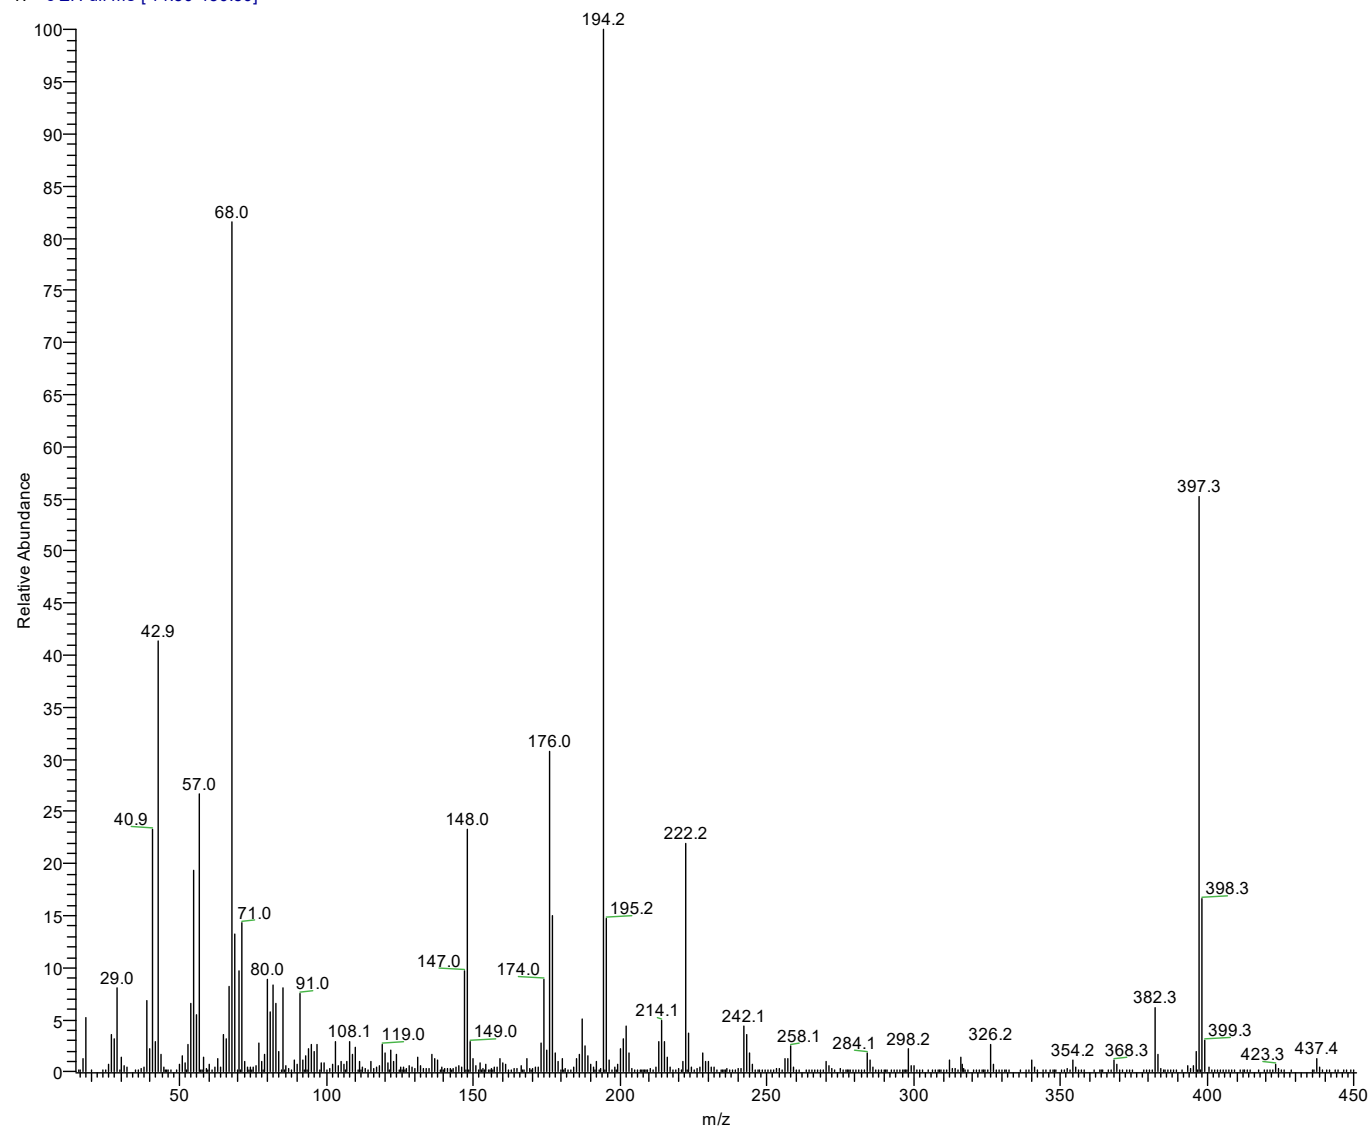

### 3. 2D spectra of compounds 37, 43, 50, 54Z, 54E

Fig. S59.  $^1\text{H}$ - $^1\text{H}$  COSY spectra of the compound 37.

lfav-Tsyp-DO-CYC-2.4.ser — AV-600, 1H-1H cosy, Tsypyshev, — DO-CYC 2 in CDCl<sub>3</sub>, 20.5mg

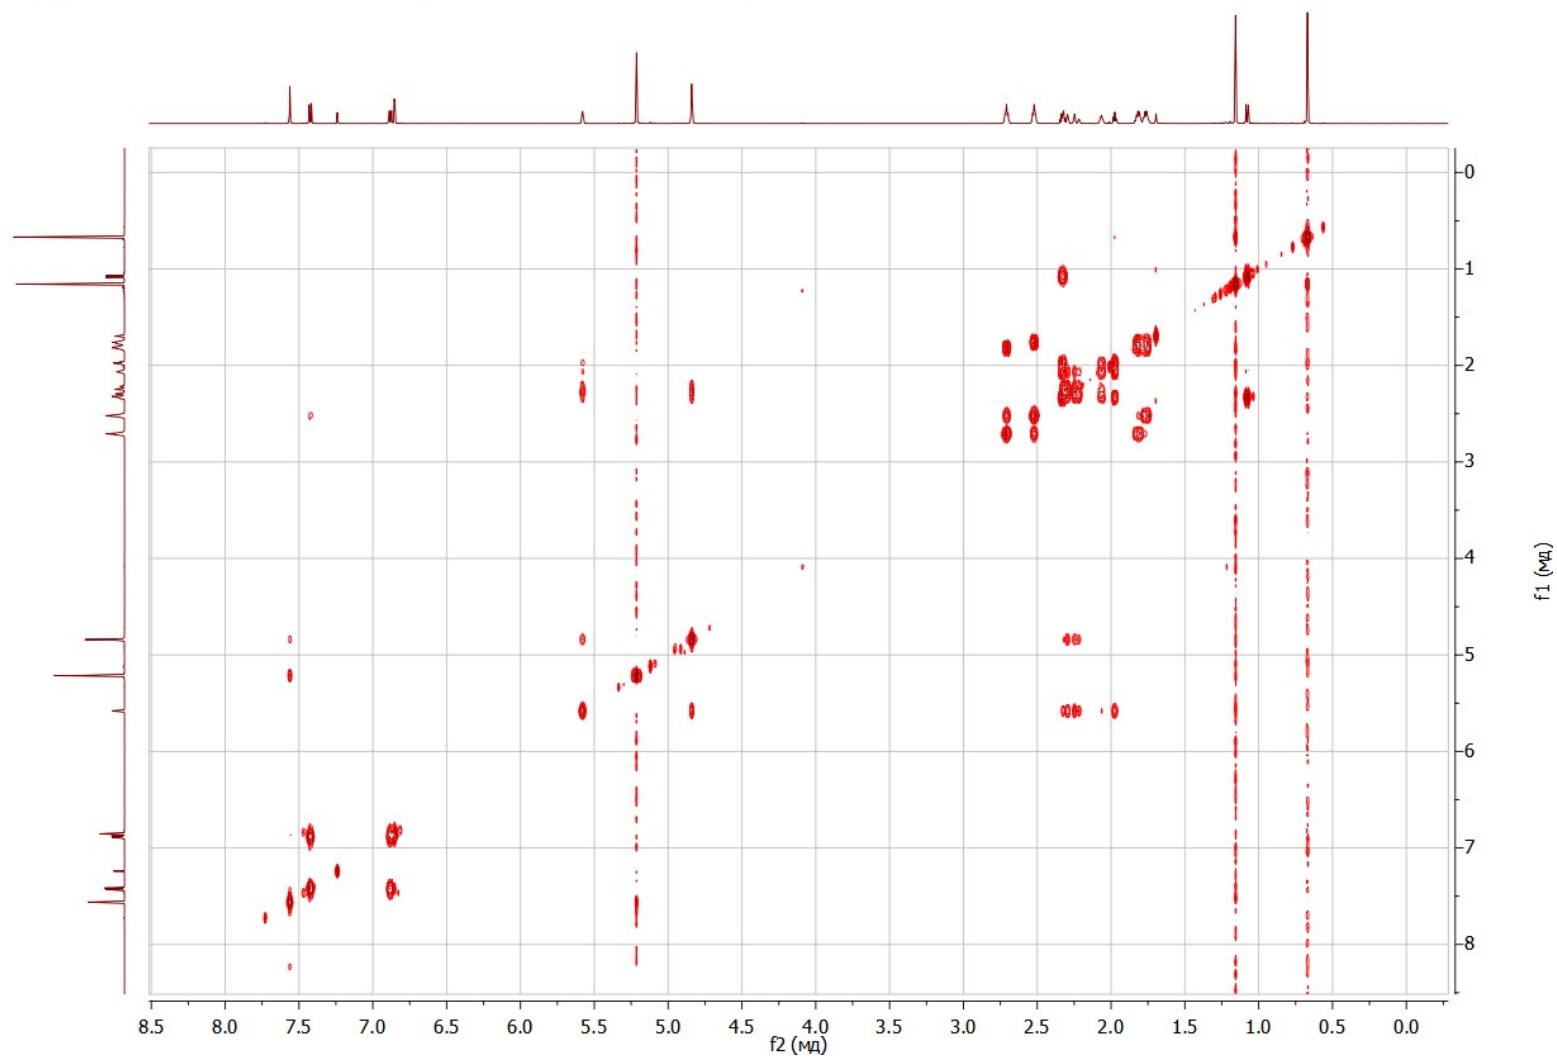



**Fig. S60.**  $^1\text{H}$ - $^1\text{H}$  NOESY spectra of the compound **37**.

lfav-Tsyp-DO-CYC-2.7.ser — AV-600, 1H-1H noesy, Tsypyshev, — DO-CYC 2 in  $\text{CDCl}_3$ , 20.5 mg

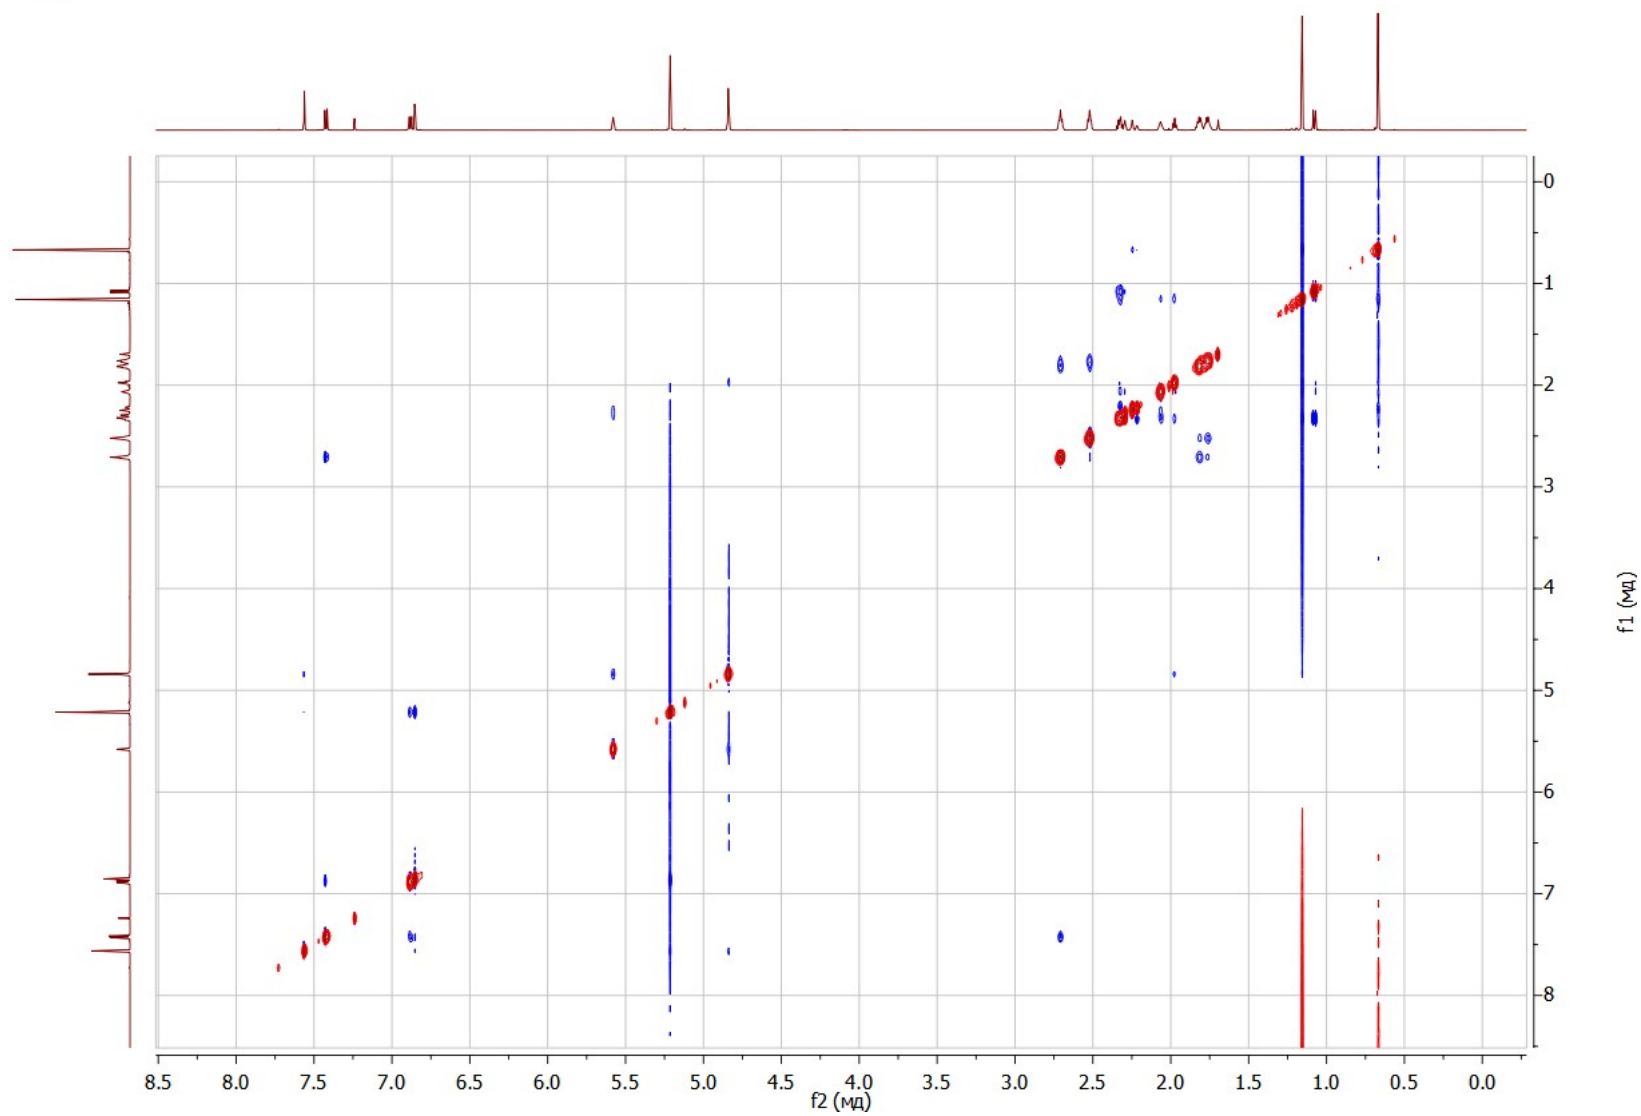

**Fig. S61.**  $^1\text{H}$ - $^{13}\text{C}$  HSQC spectra of the compound **37**.

lfav-Tsyp-DO-CYC-2.5.ser — AV-600,  $^{13}\text{C}$ - $^1\text{H}$  hsqc, Tsypyshev, — DO-CYC 2 in  $\text{CDCl}_3$ , 20.5 mg

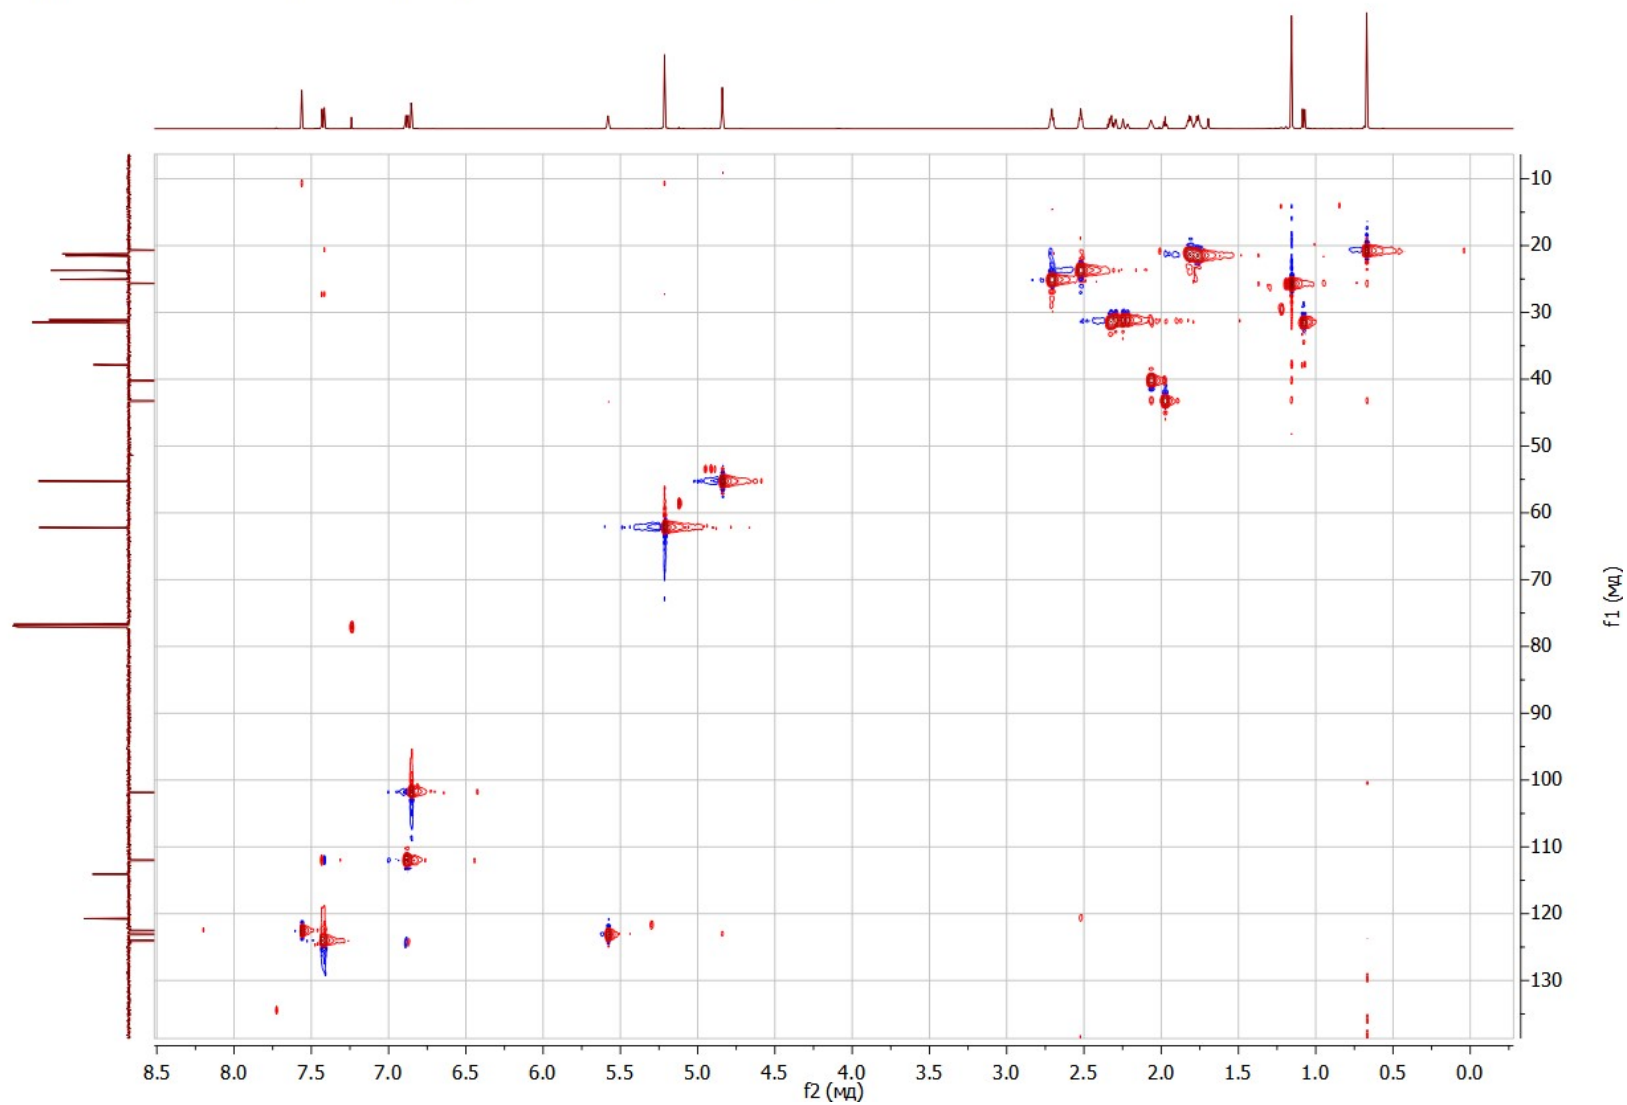

**Fig. S62.**  $^1\text{H}$ - $^{13}\text{C}$  HMBC spectra of the compound **37**.

lfav-Tsyp-DO-CYC-2.6.ser — AV-600, 13C-1H hmbc, Tsypyshev, — DO-CYC 2 in  $\text{CDCl}_3$ , 20.5 mg

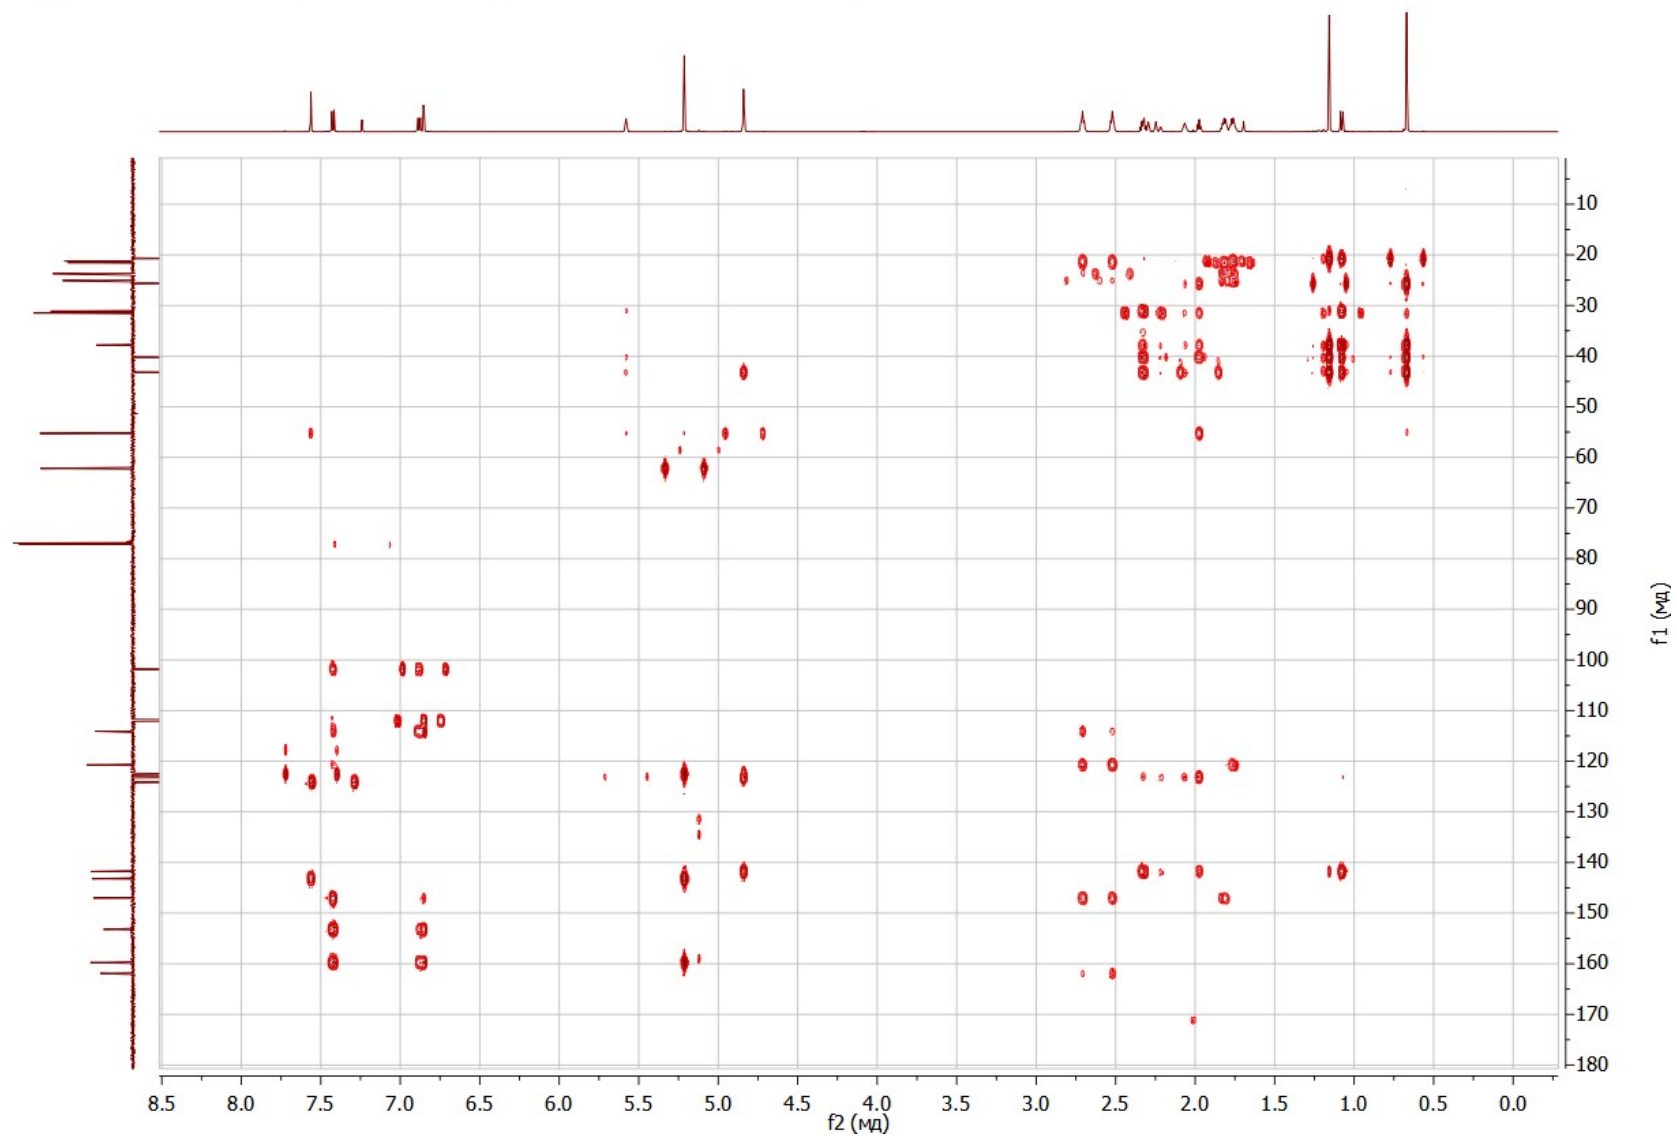

Fig. S63.  $^1\text{H}$ - $^1\text{H}$  COSY spectra of the compound **43**

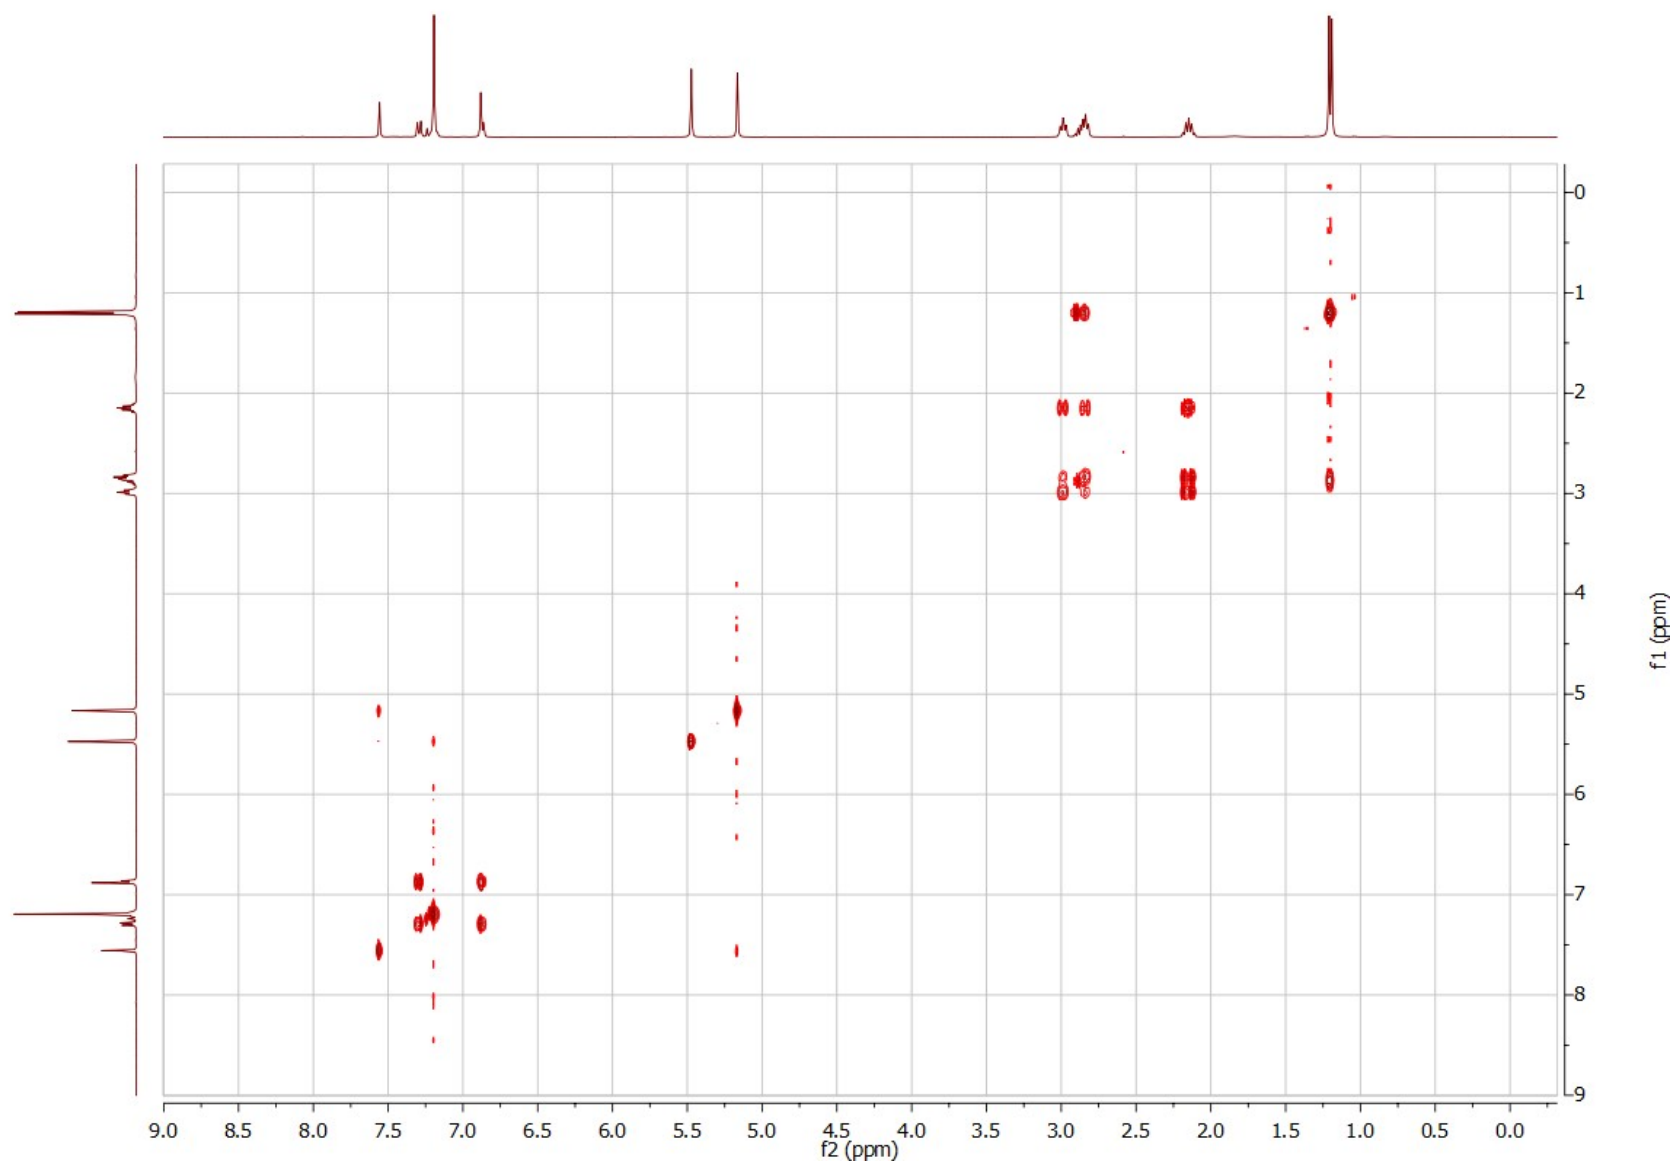

Fig. S64.  $^1\text{H}$ - $^1\text{H}$  NOESY spectra of the compound 43

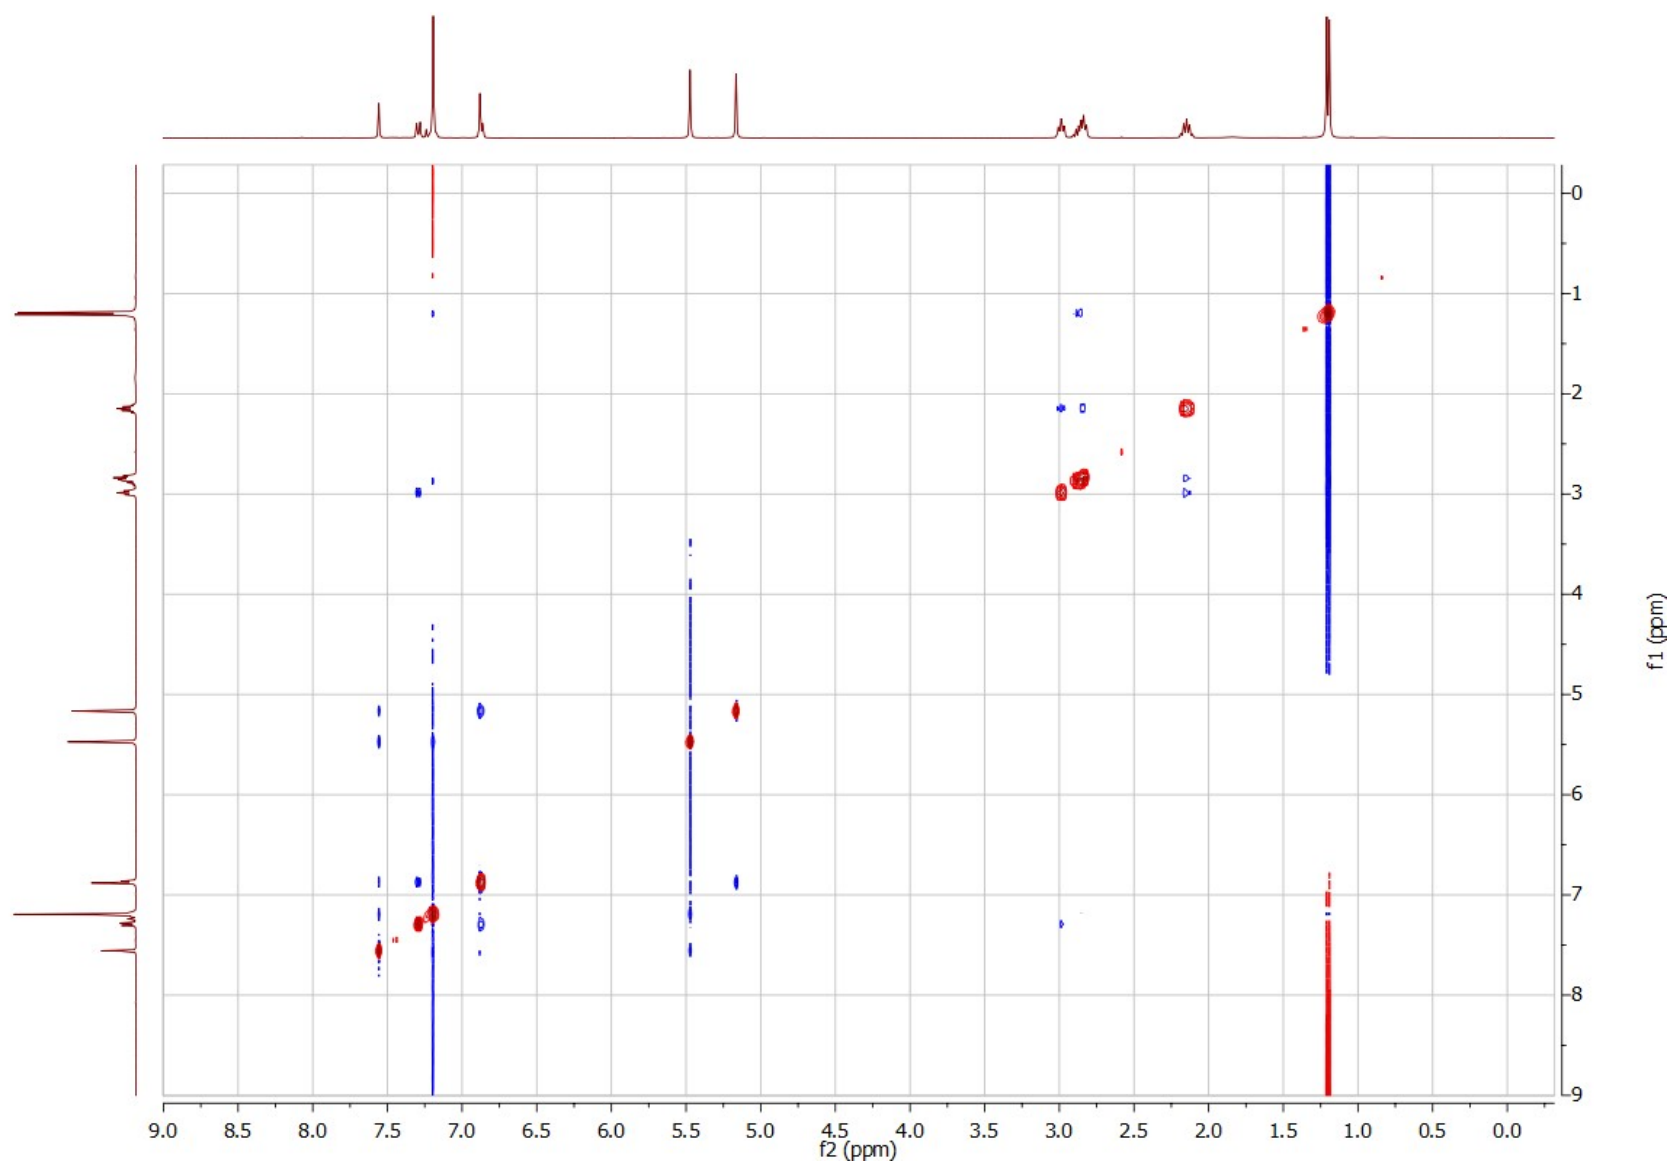

Fig. S65.  $^1\text{H}$ - $^{13}\text{C}$  HSQC spectra of the compound 43

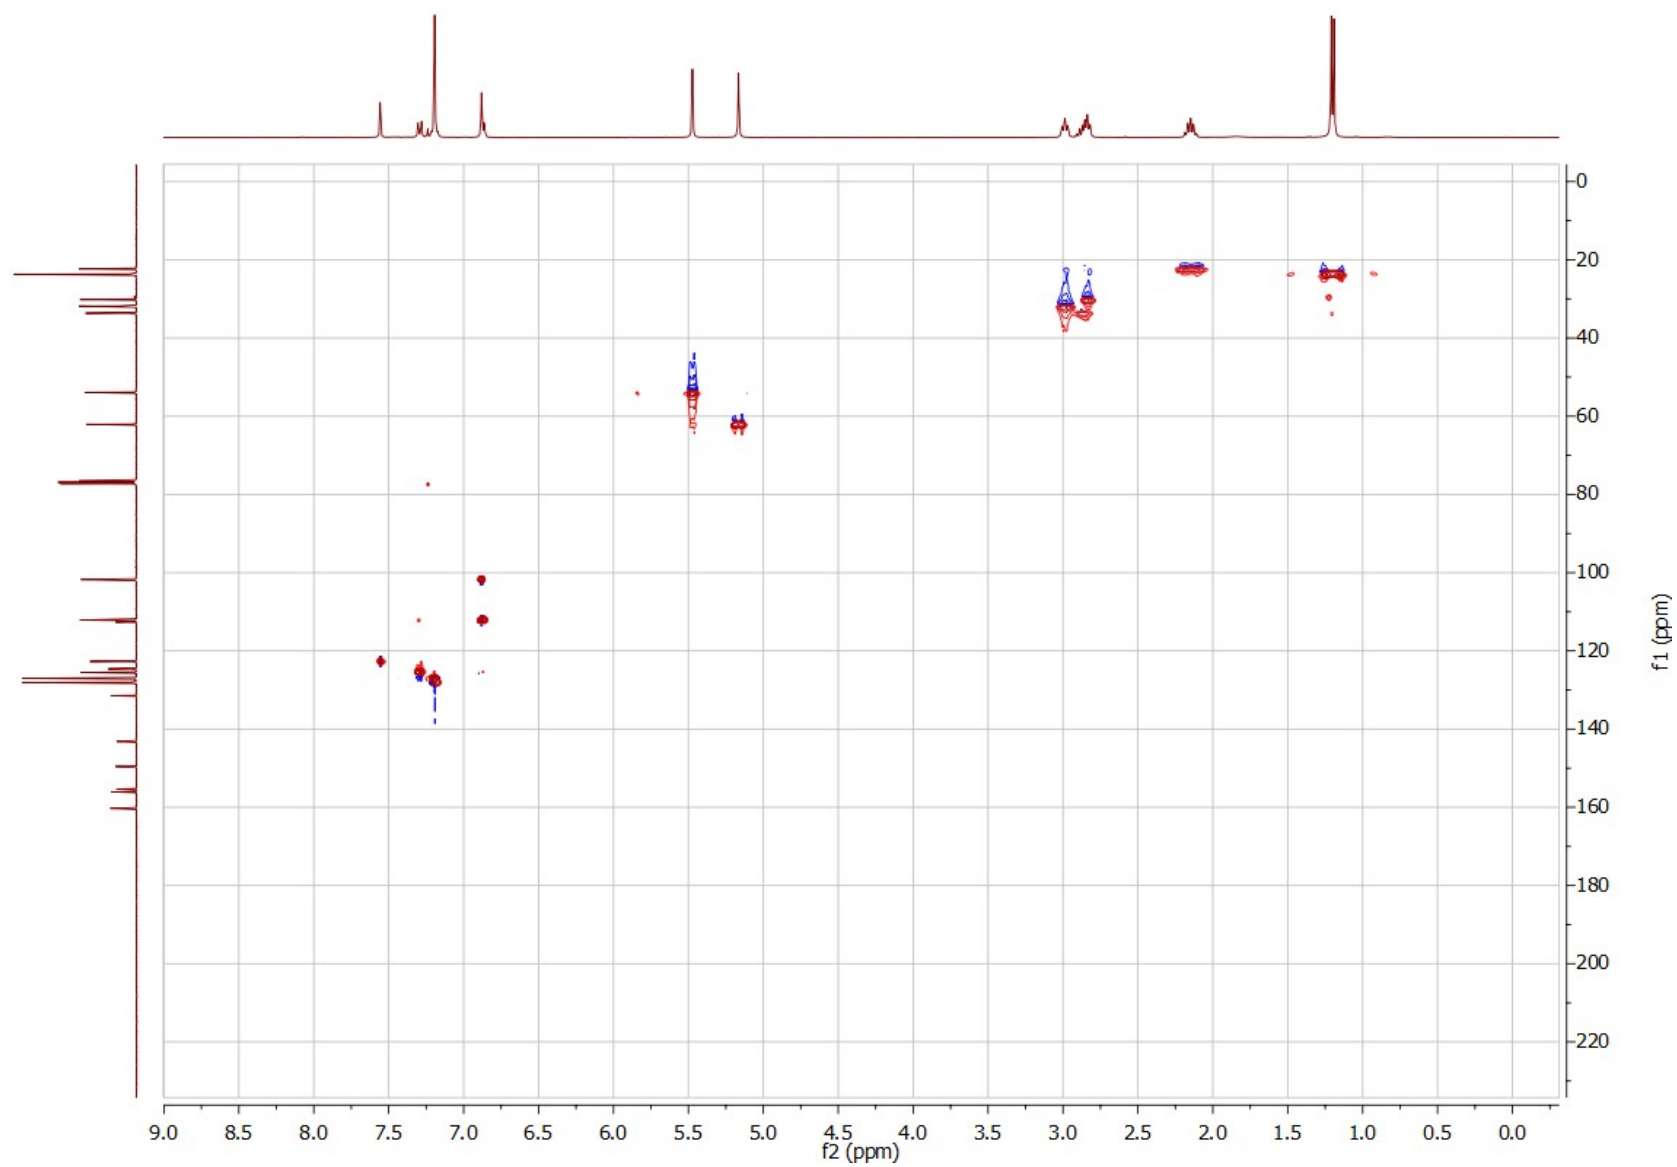

Fig. S66.  $^1\text{H}$ - $^{13}\text{C}$  HMBC spectra of the compound 43

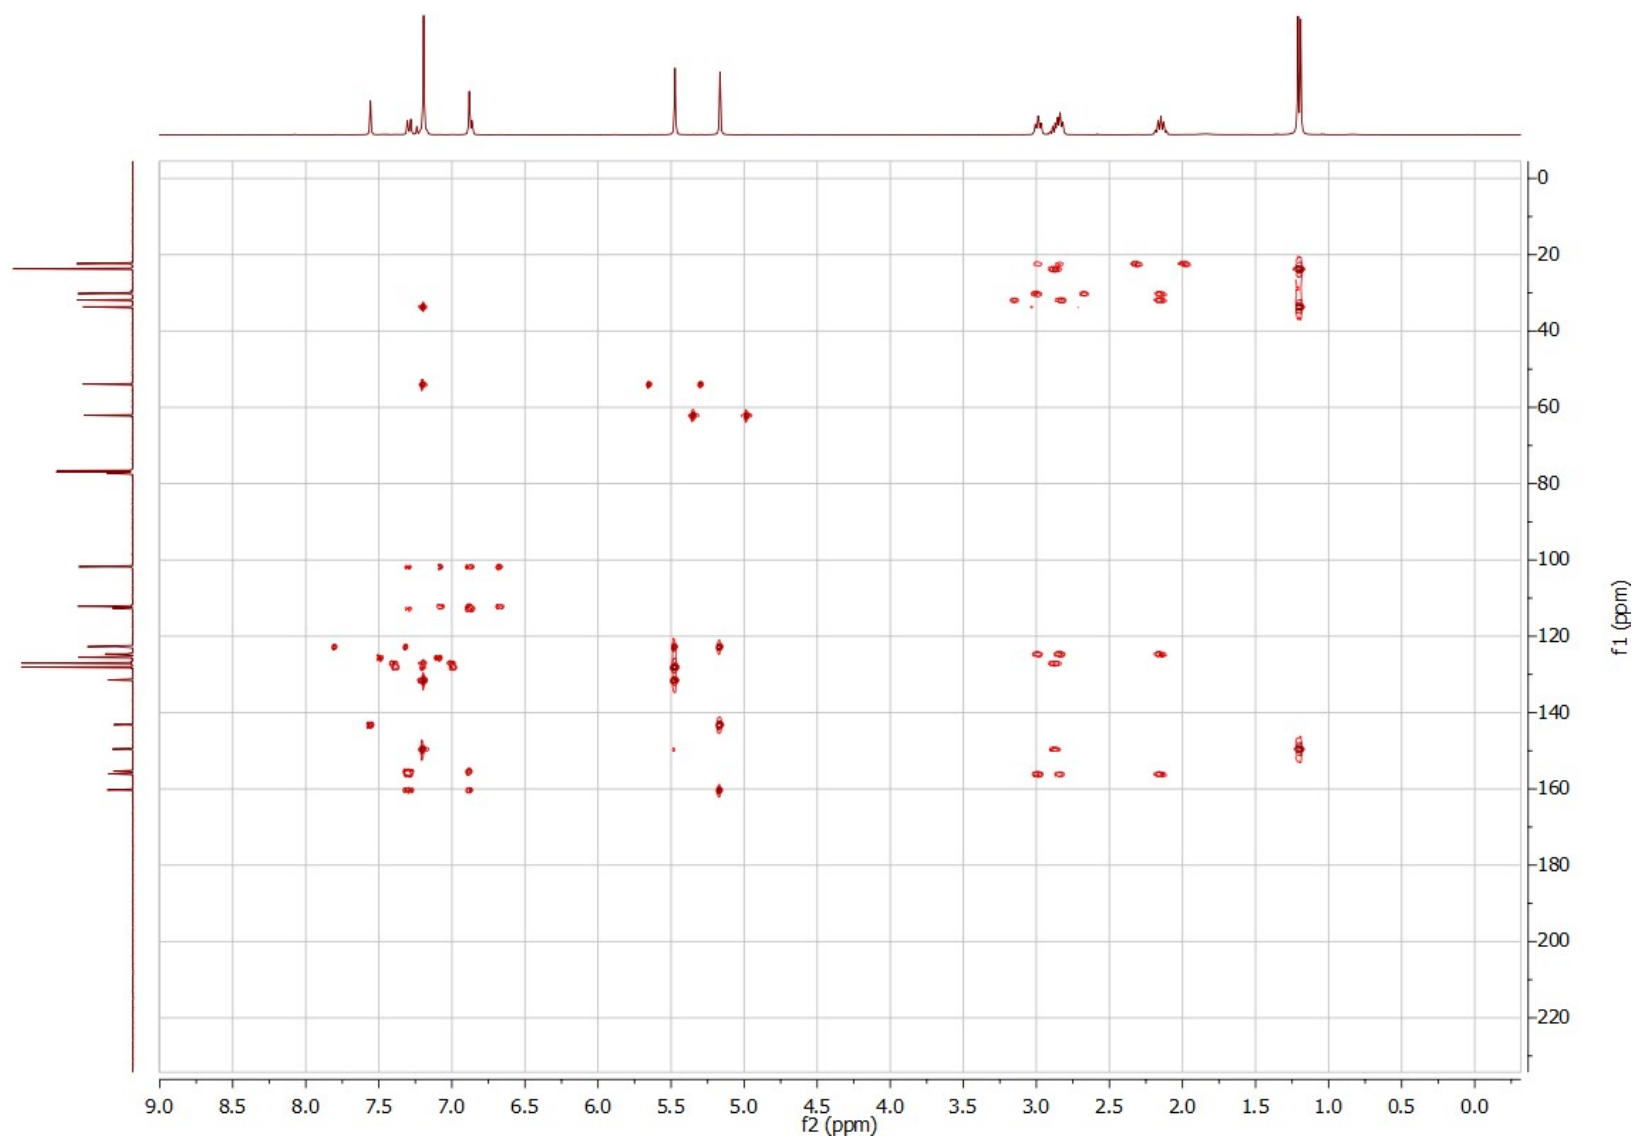

Fig. S67.  $^1\text{H}$ - $^1\text{H}$  COSY spectra of the compound 50

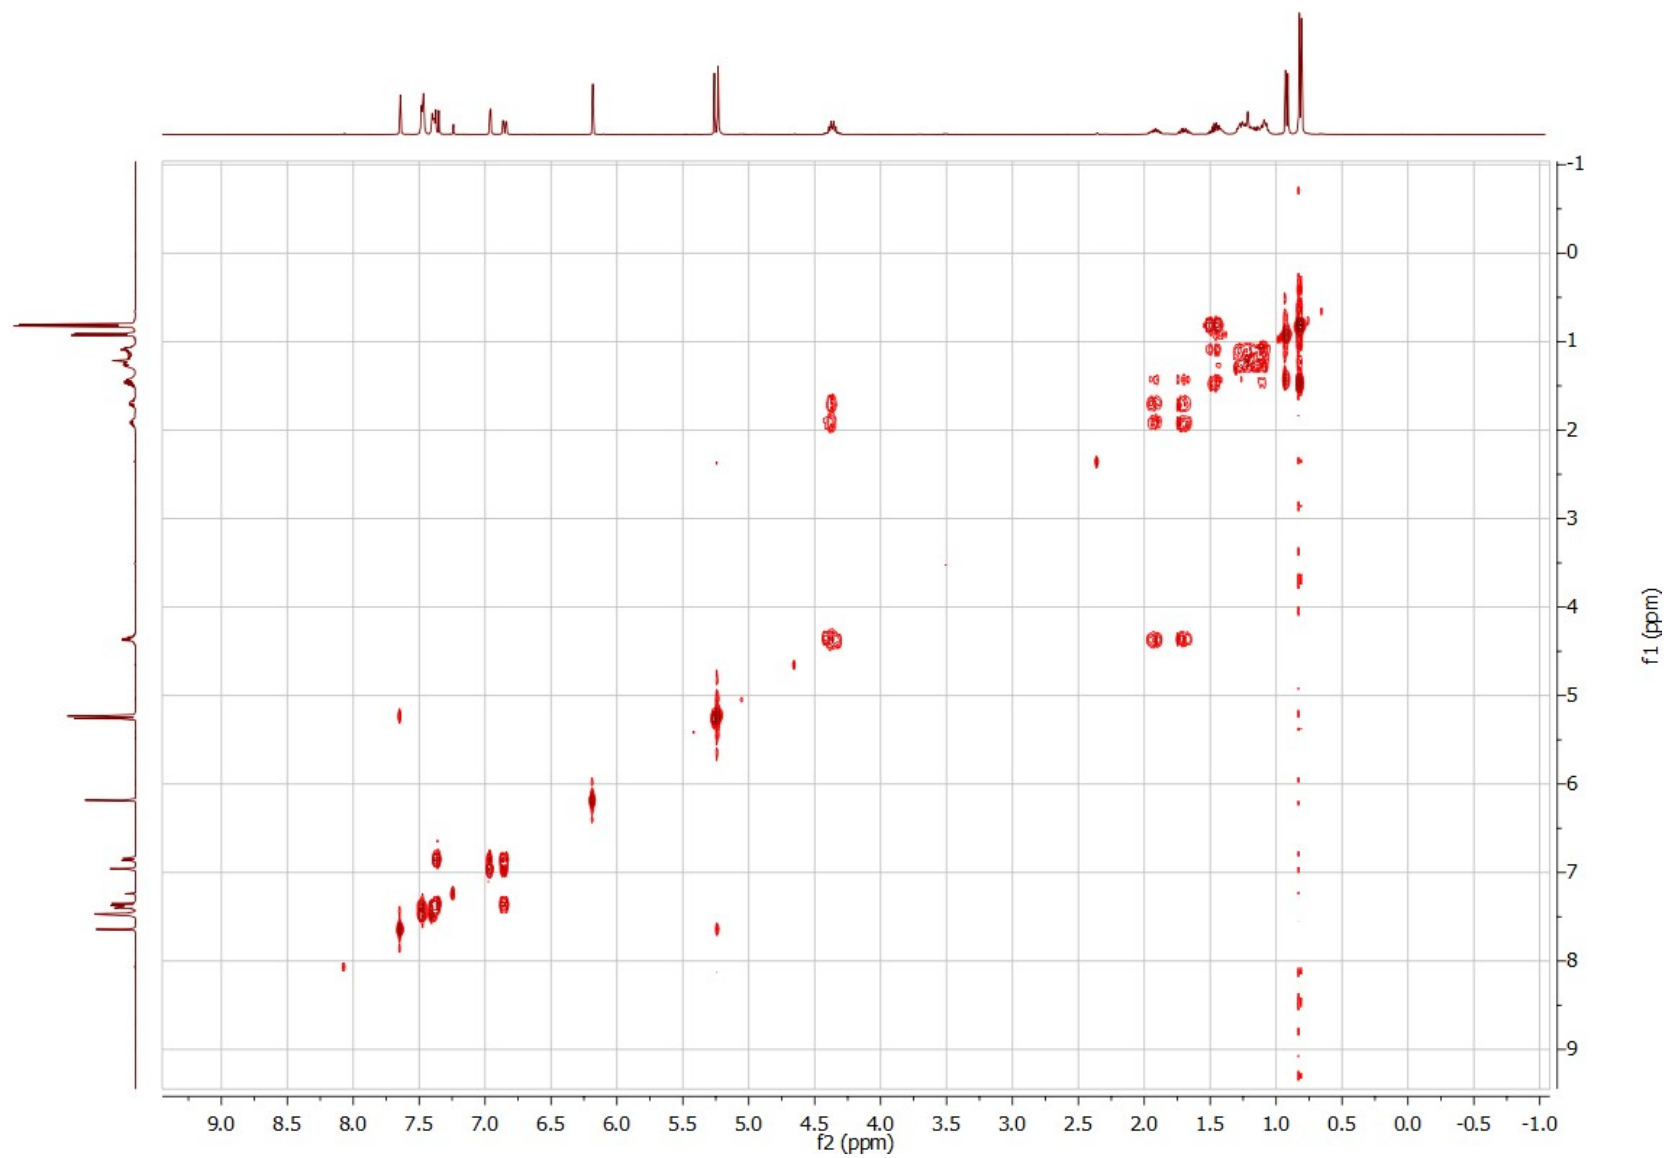



Fig. S68.  $^1\text{H}$ - $^1\text{H}$  NOESY spectra of the compound 50

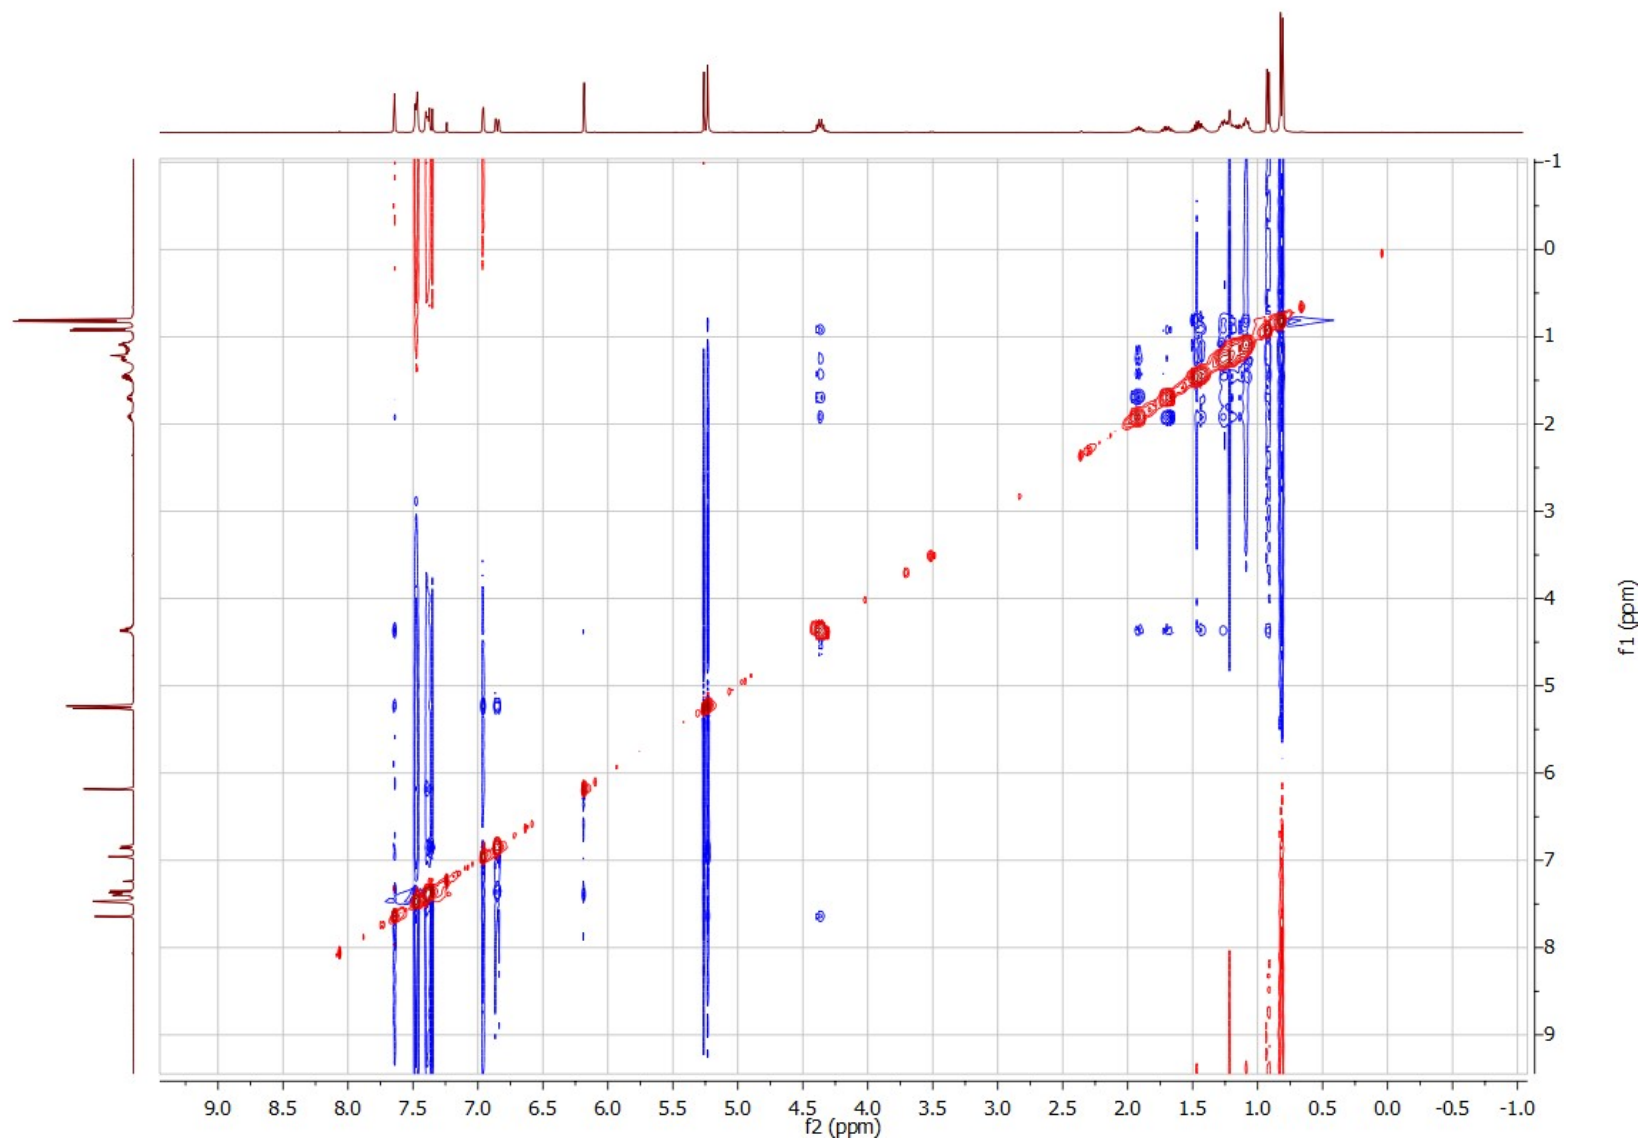

Fig. S69.  $^1\text{H}$ - $^{13}\text{C}$  HSQC spectra of the compound 50

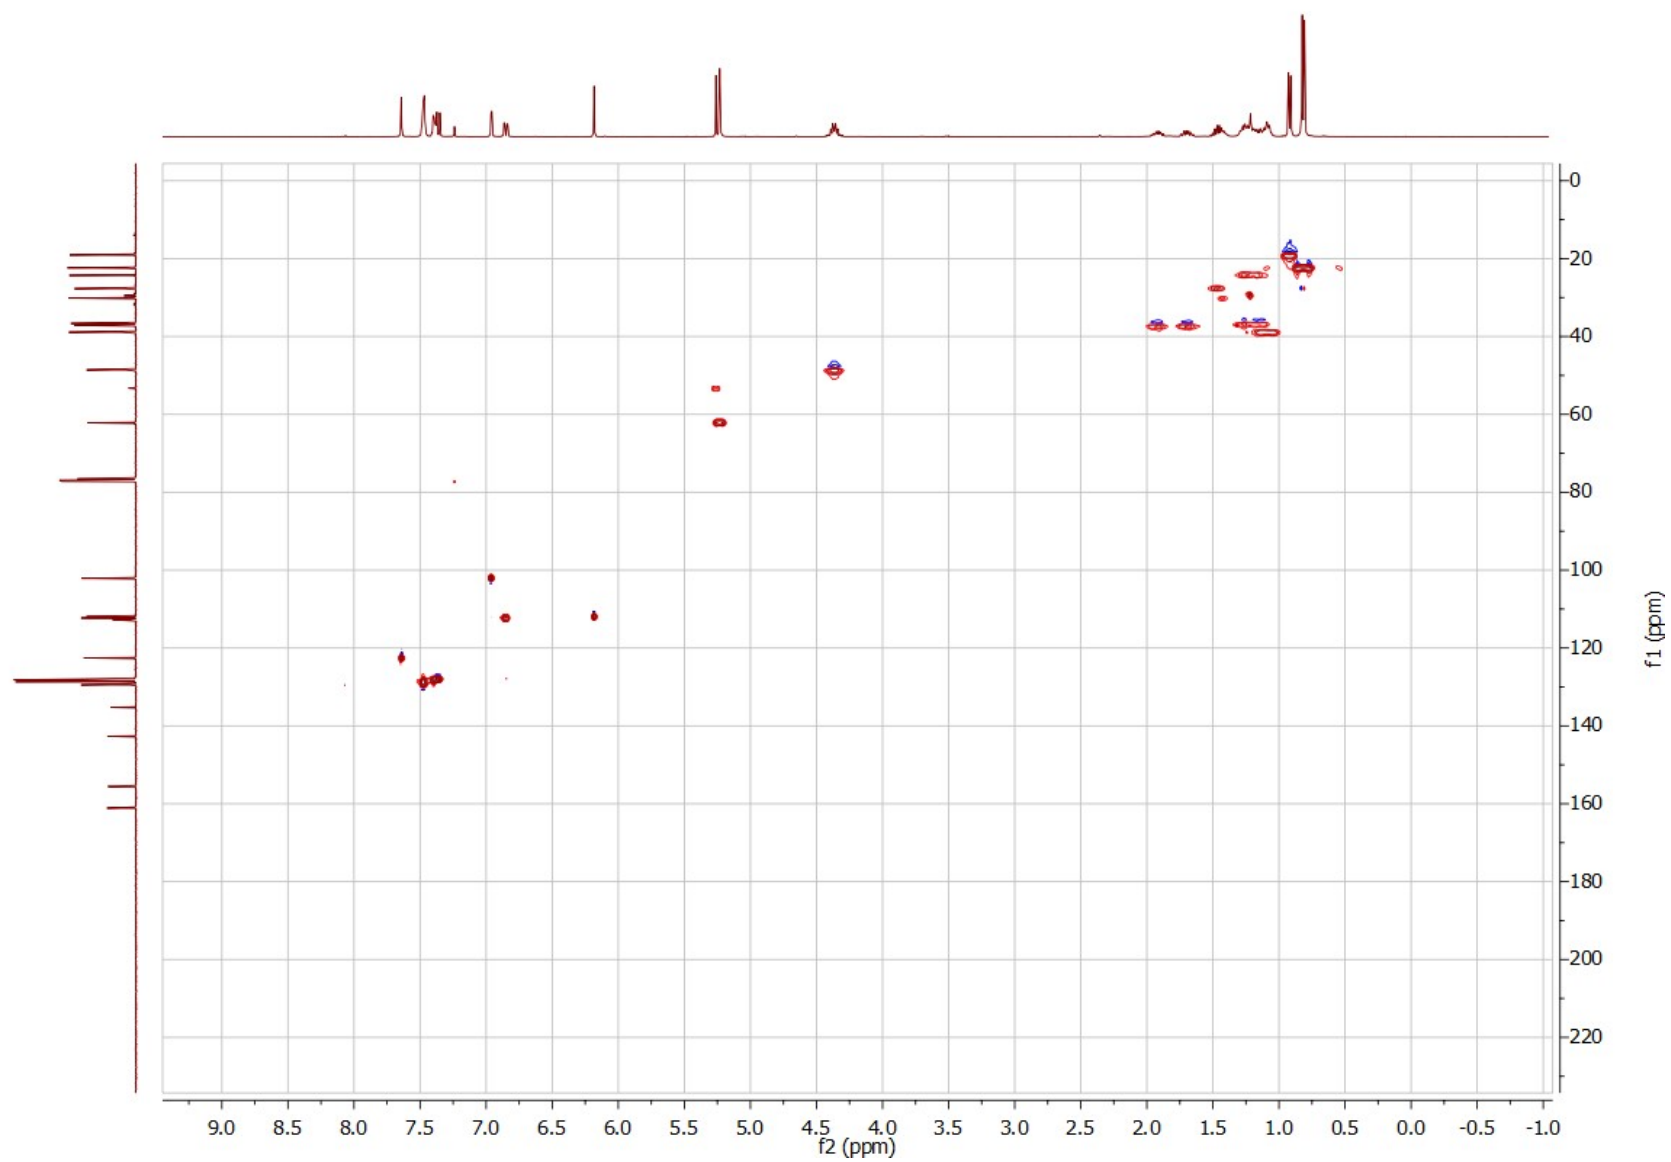

**Fig. S70.**  $^1\text{H}$ - $^{13}\text{C}$  HMBC spectra of the compound **50**

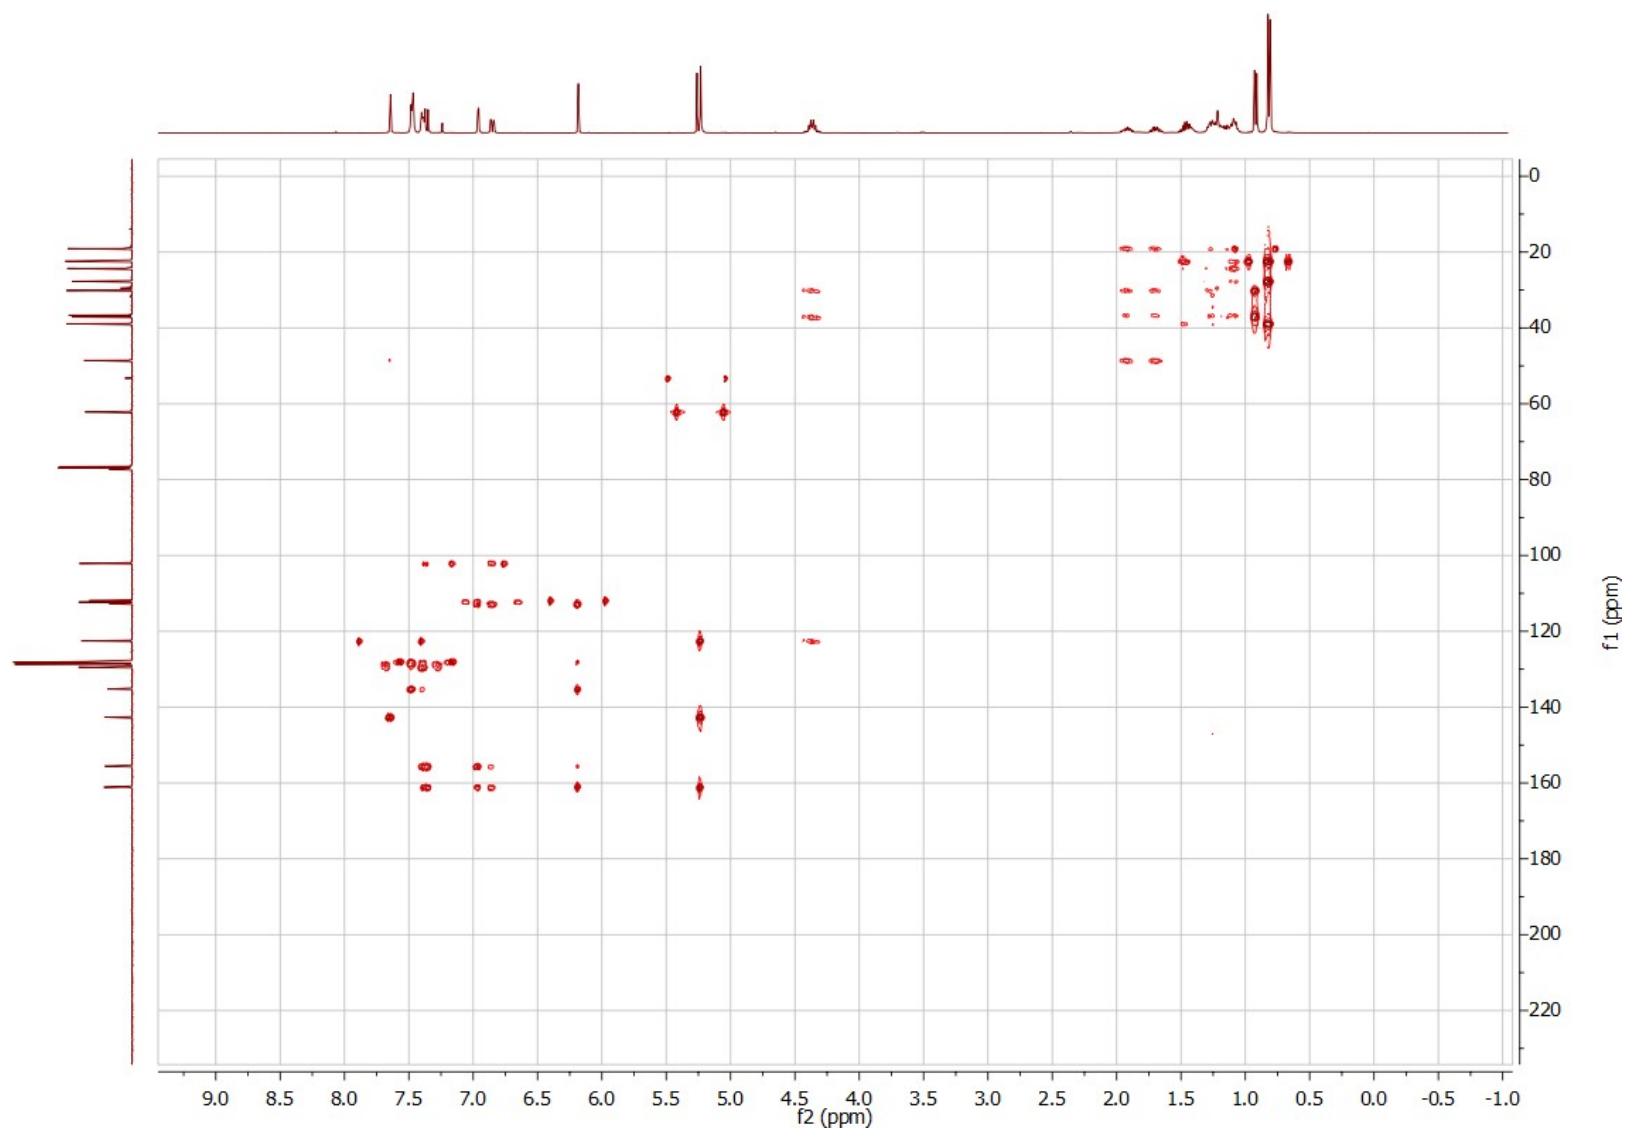

**Fig. S71.**  $^1\text{H}$ - $^1\text{H}$  COSY spectra of the compound **54Z**.

lfav-do-cyc11-i1-2d.3.ser — D0-CYC11-i1-2D;  $\text{CDCl}_3$  —  $^1\text{H}$ - $^1\text{H}$  COSY

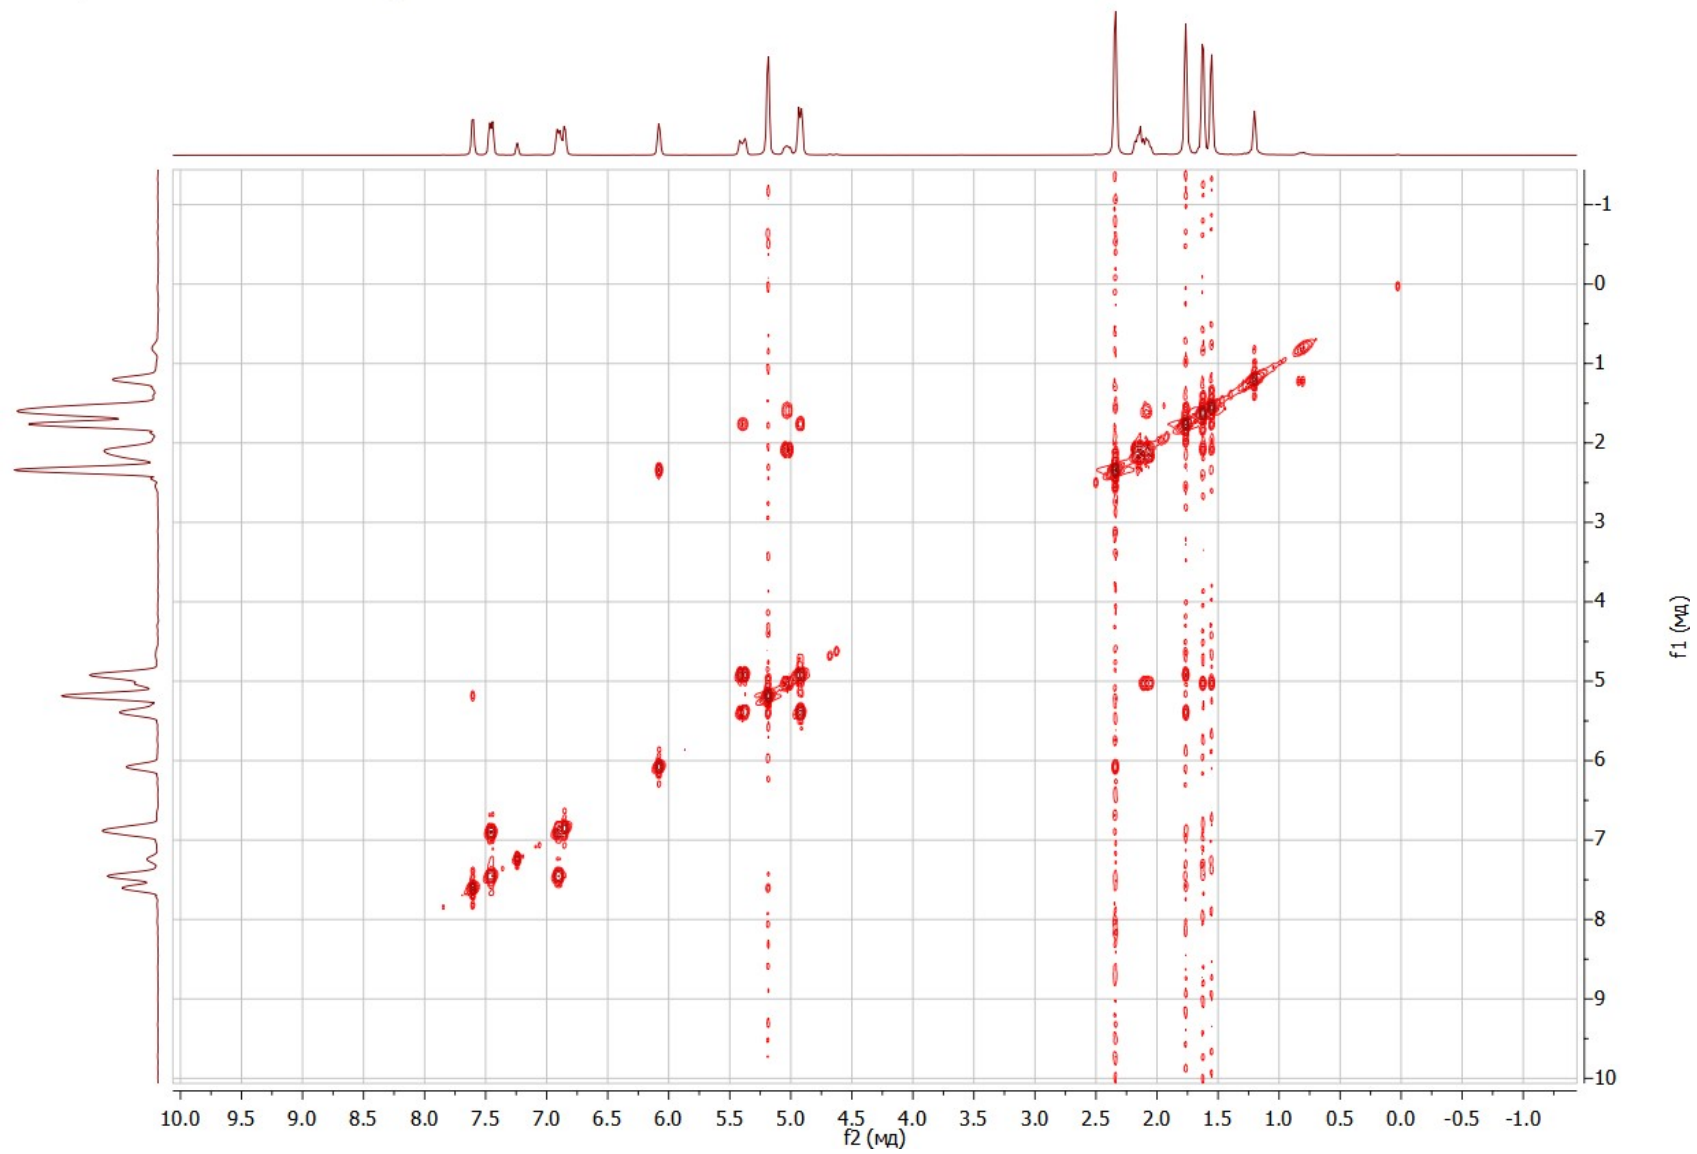

**Fig. S72.**  $^1\text{H}$ - $^1\text{H}$  NOESY spectra of the compound **54Z**.

lfav-do-cyc11-i1-2d.4.ser — D0-CYC11-i1-2D; CDCl<sub>3</sub> — 1H-1H NOESY

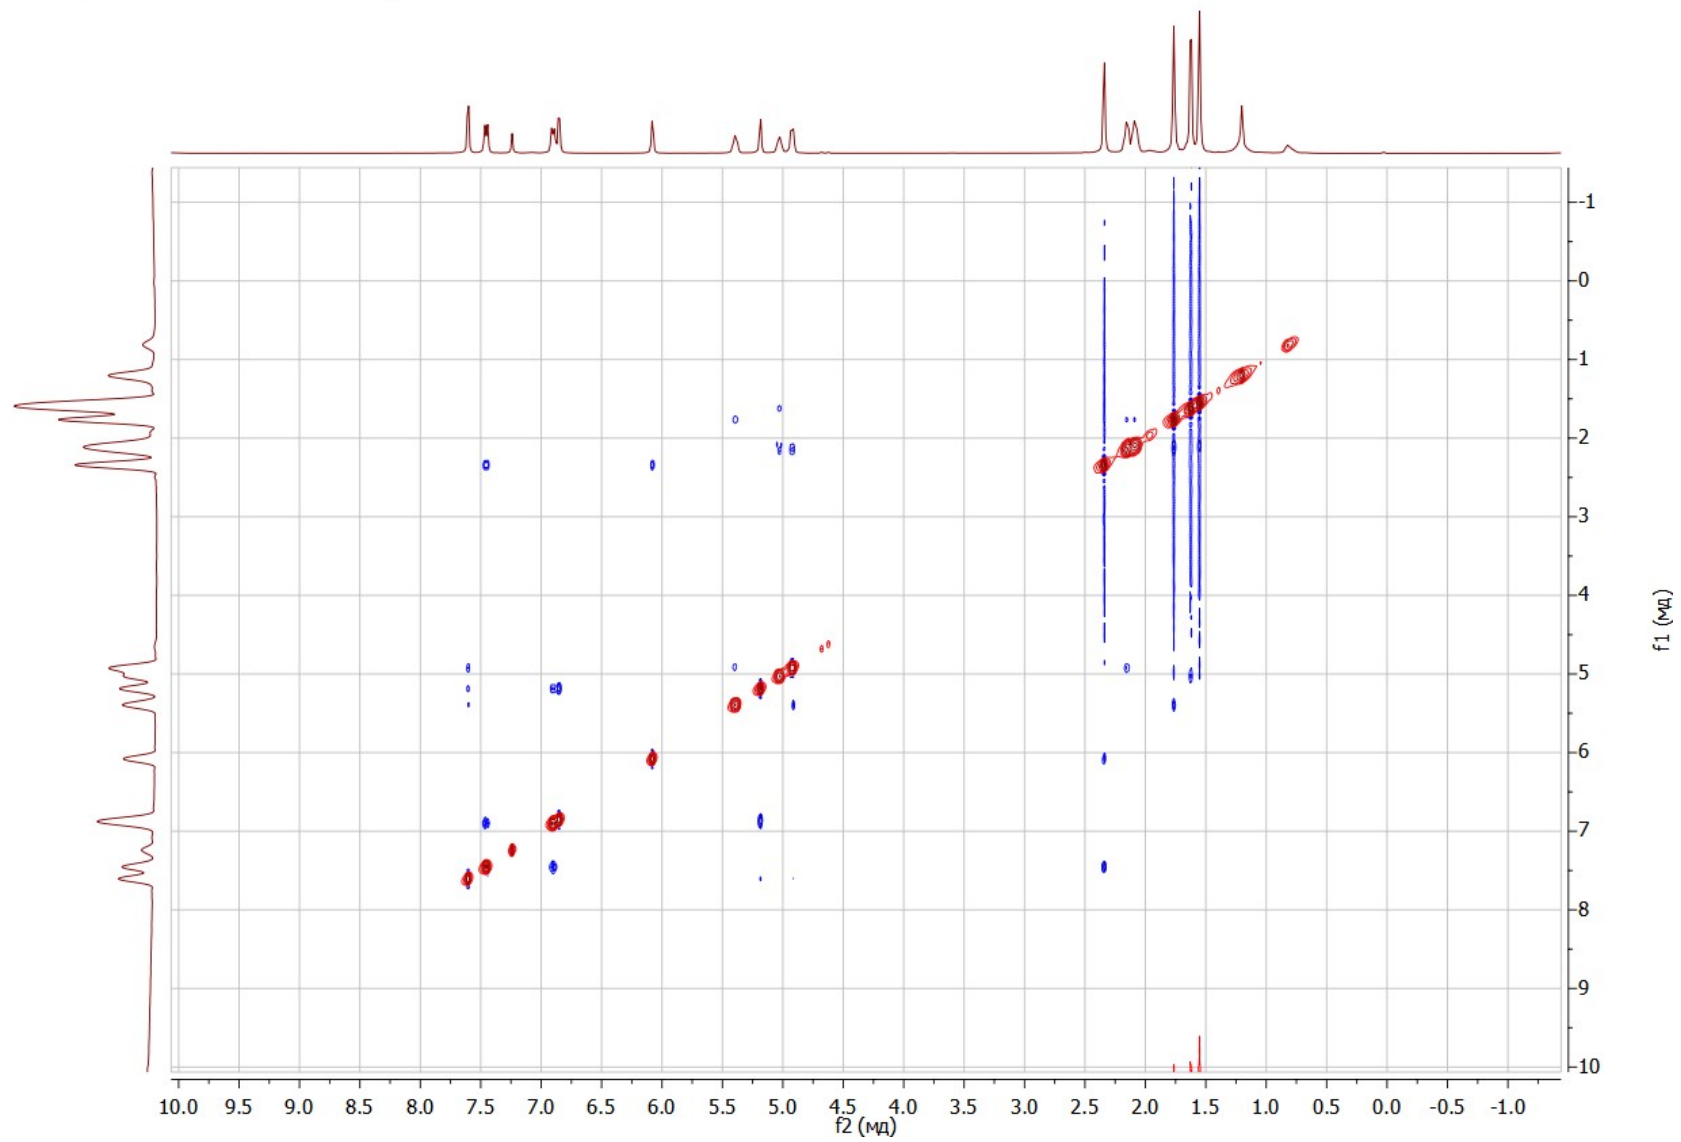

**Fig. S73.**  $^1\text{H}$ - $^{13}\text{C}$  HSQC spectra of the compound **54Z**.

lfav-do-cyc11-i1-2d.5.ser — D0-CYC11-i1-2D;  $\text{CDCl}_3$  —  $^1\text{H}$ - $^{13}\text{C}$  HSQC

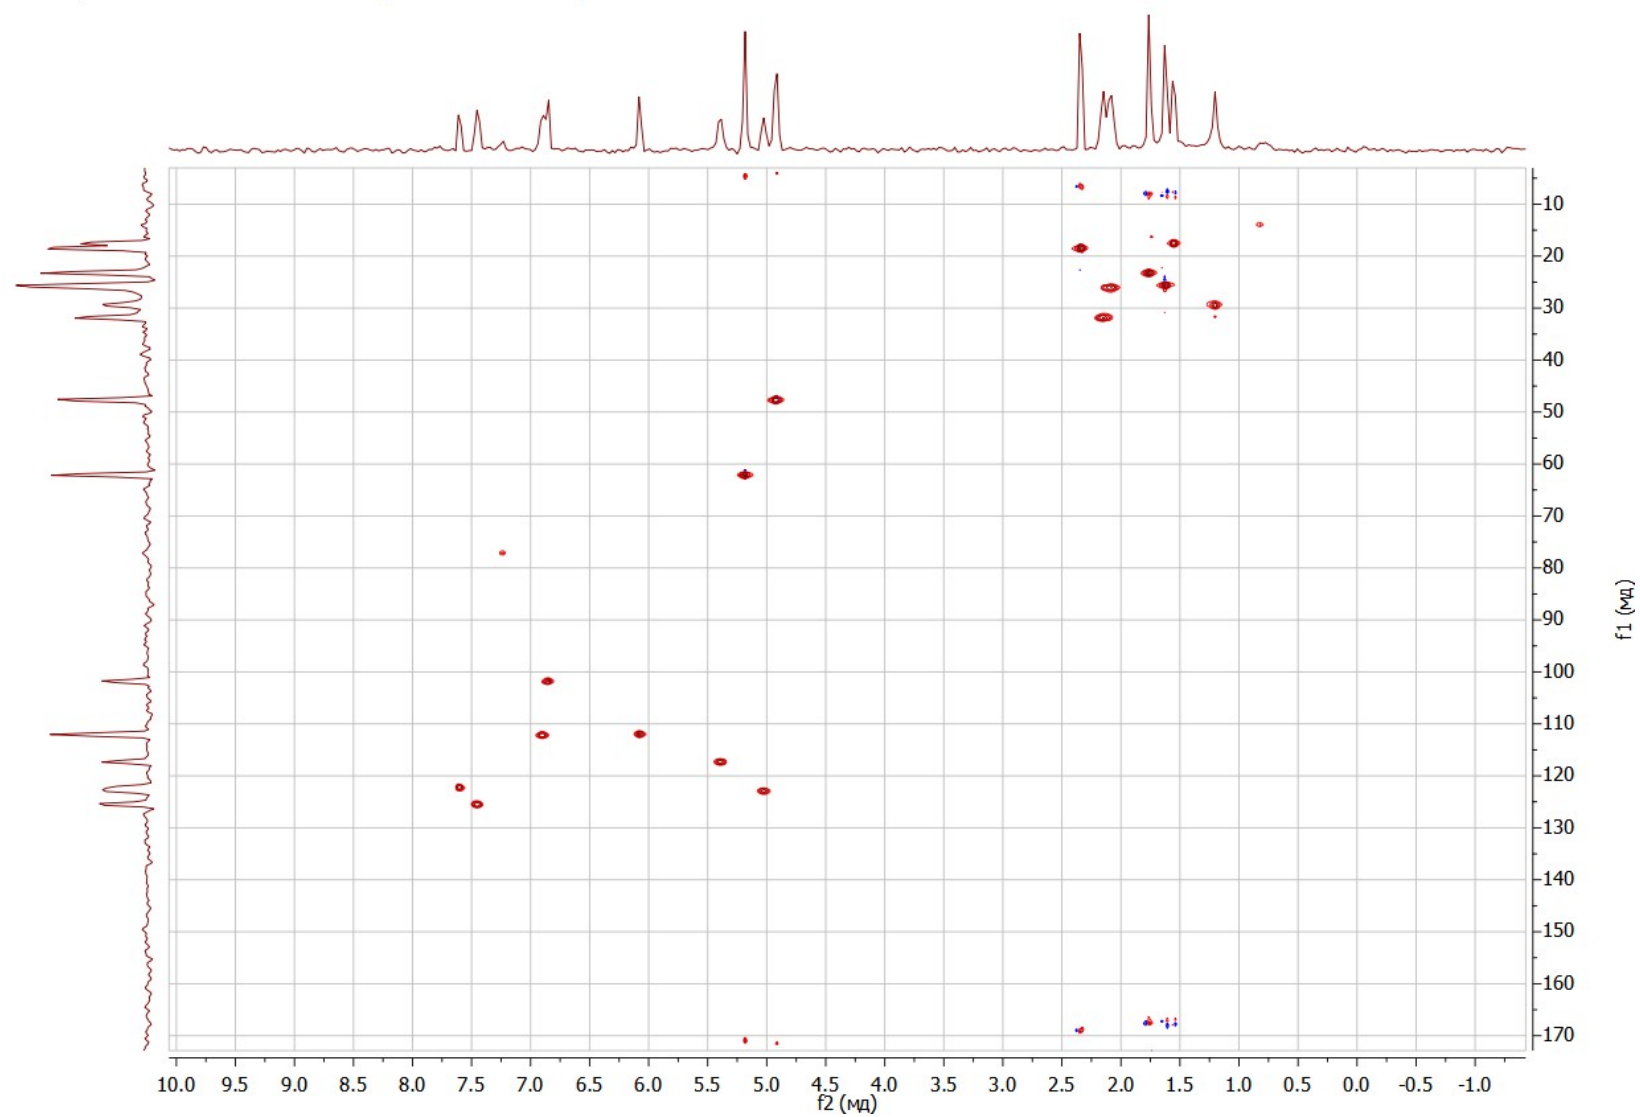

**Fig. S74.**  $^1\text{H}$ - $^{13}\text{C}$  HMBC spectra of the compound **54Z**.

lfav-do-cyc11-i1-2d.6.ser — D0-CYC11-i1-2D; CDCl<sub>3</sub> —  $^1\text{H}$ - $^{13}\text{C}$  HMBC

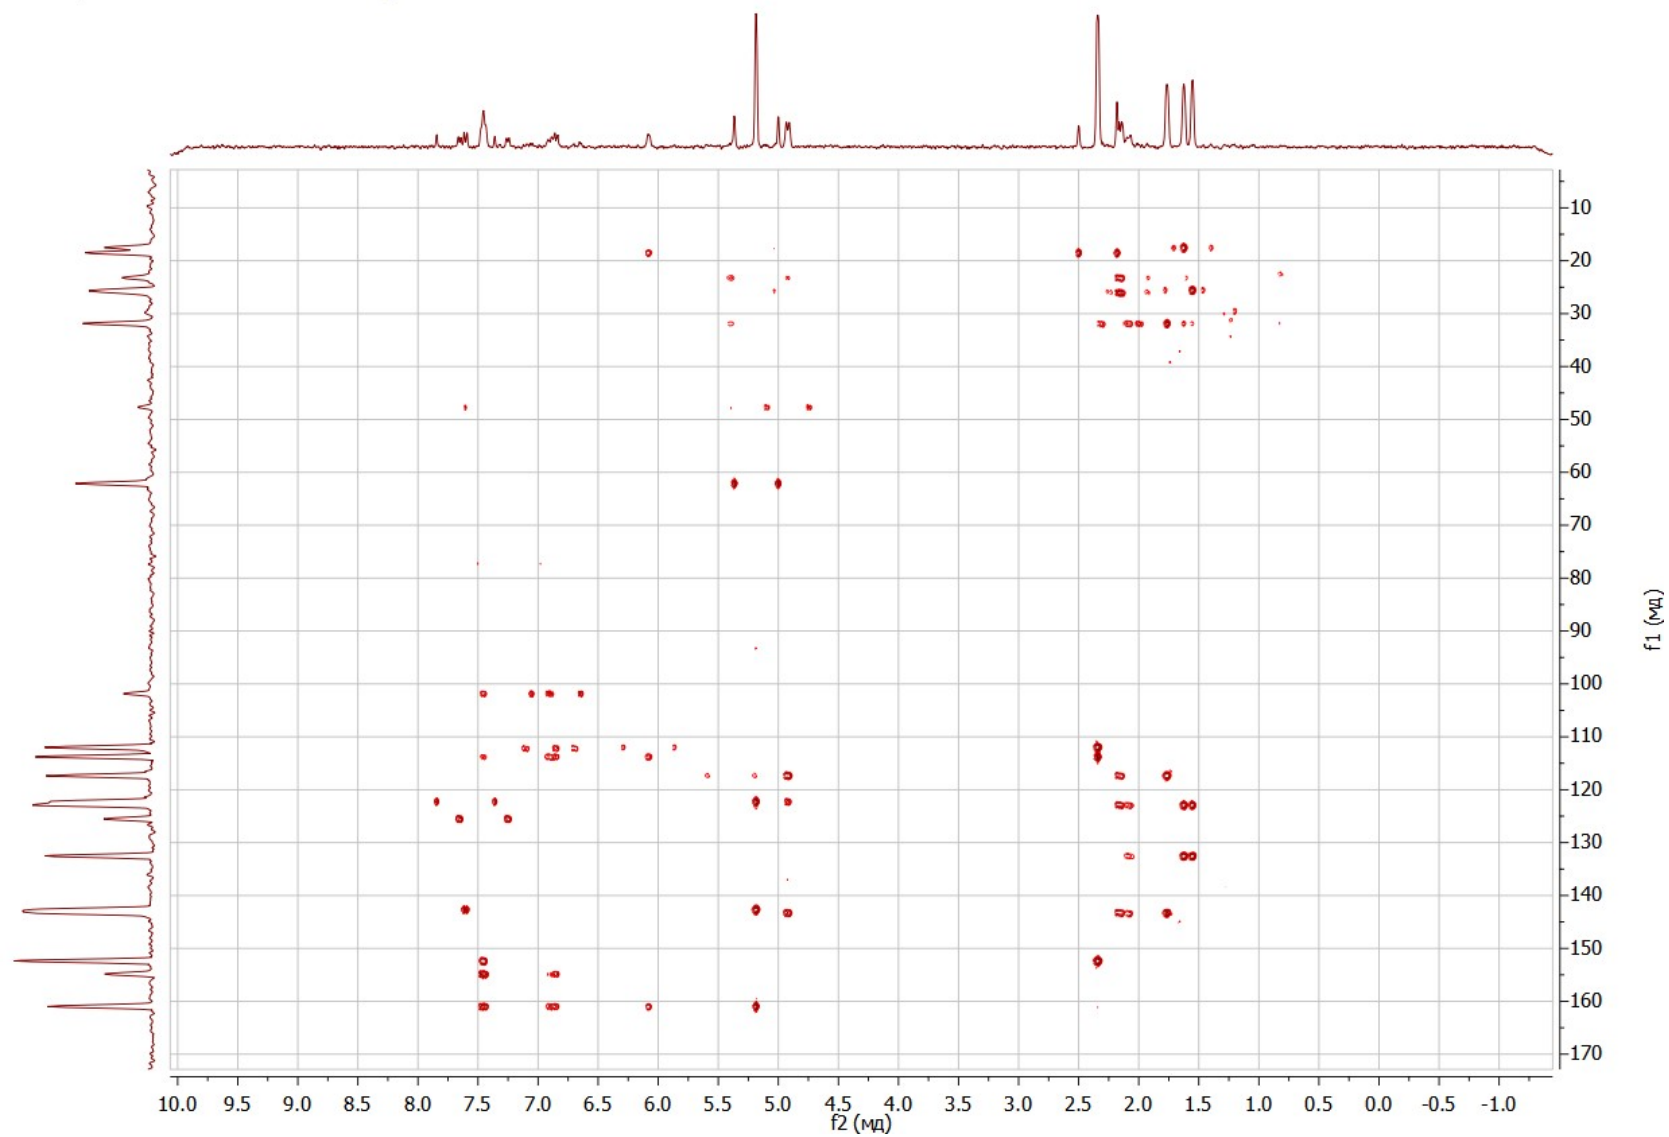

**Fig. S75.**  $^1\text{H}$ - $^1\text{H}$  COSY spectra of the compound **54E**.

lfav-do-cyc11-i2-2d.3.ser — D0-CYC11-I2-2D; CDCl<sub>3</sub> — 1H-1H COSY

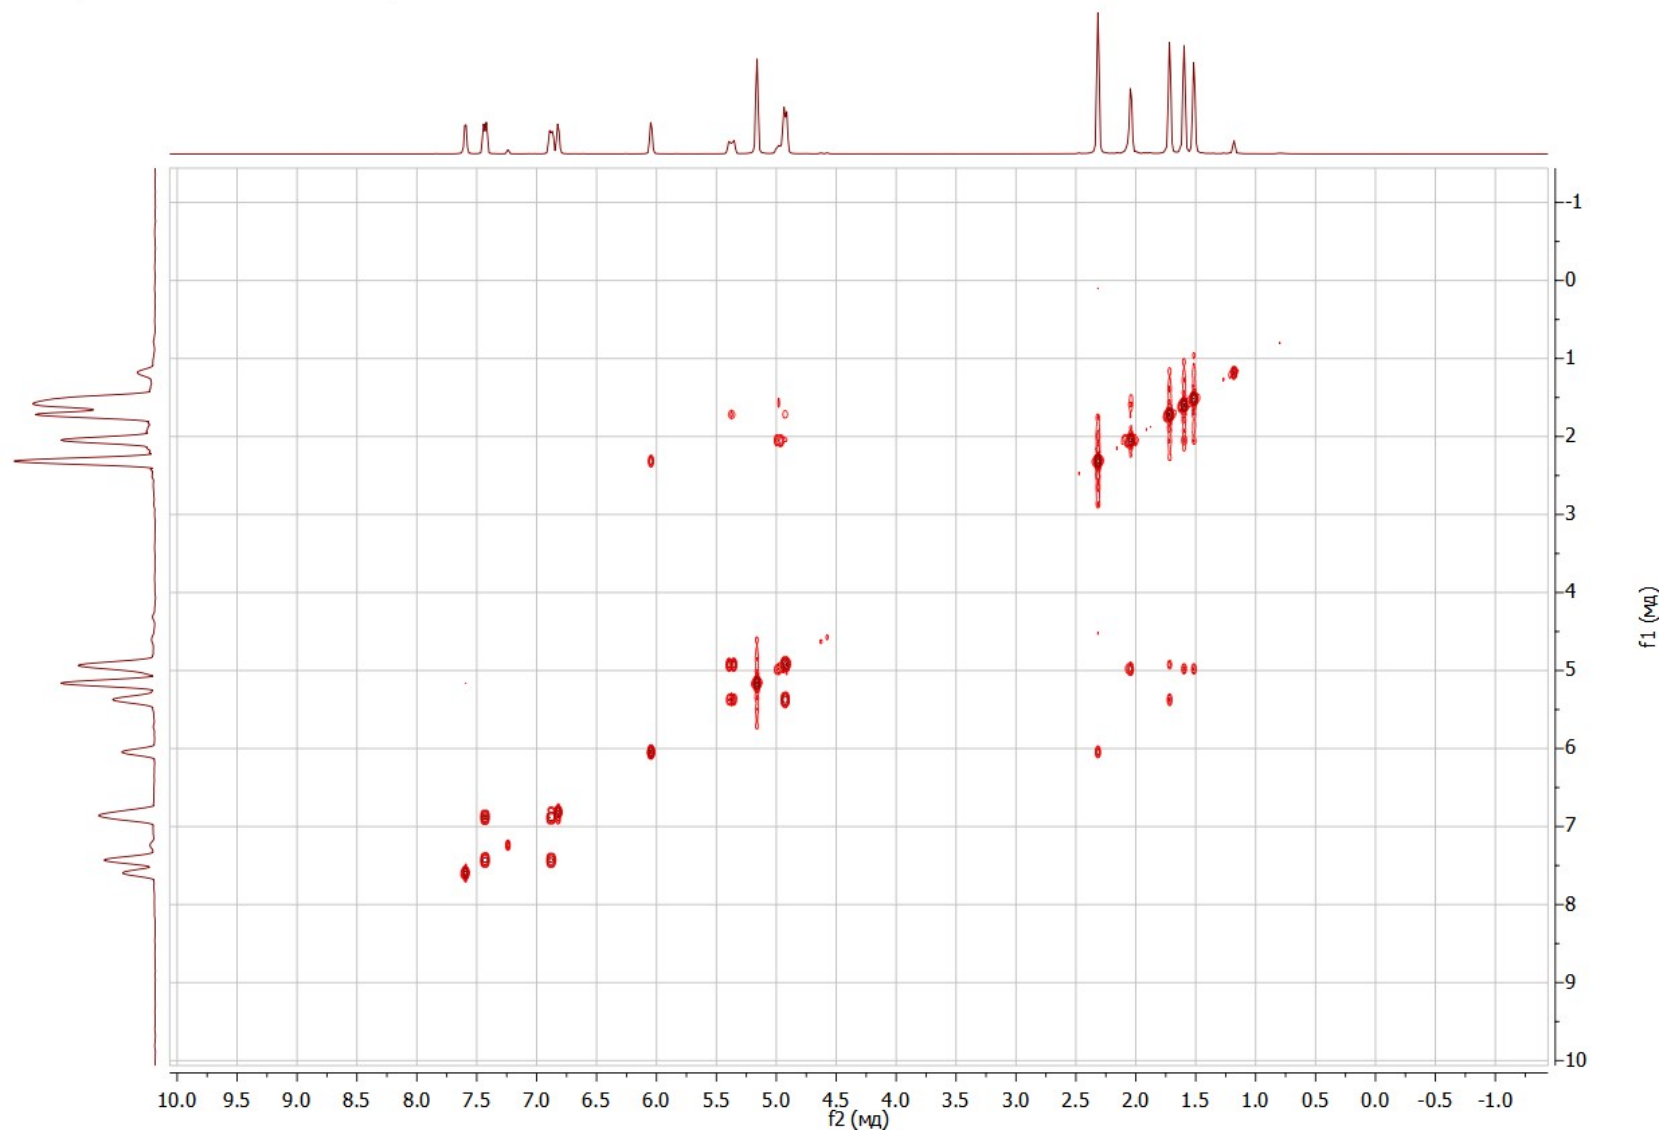



**Fig. S76.**  $^1\text{H}$ - $^1\text{H}$  NOESY spectra of the compound **54E**.

lfav-do-cyc11-i2-2d.4.ser — D0-CYC11-I2-2D; CDCl<sub>3</sub> —  $^1\text{H}$ - $^1\text{H}$  NOESY

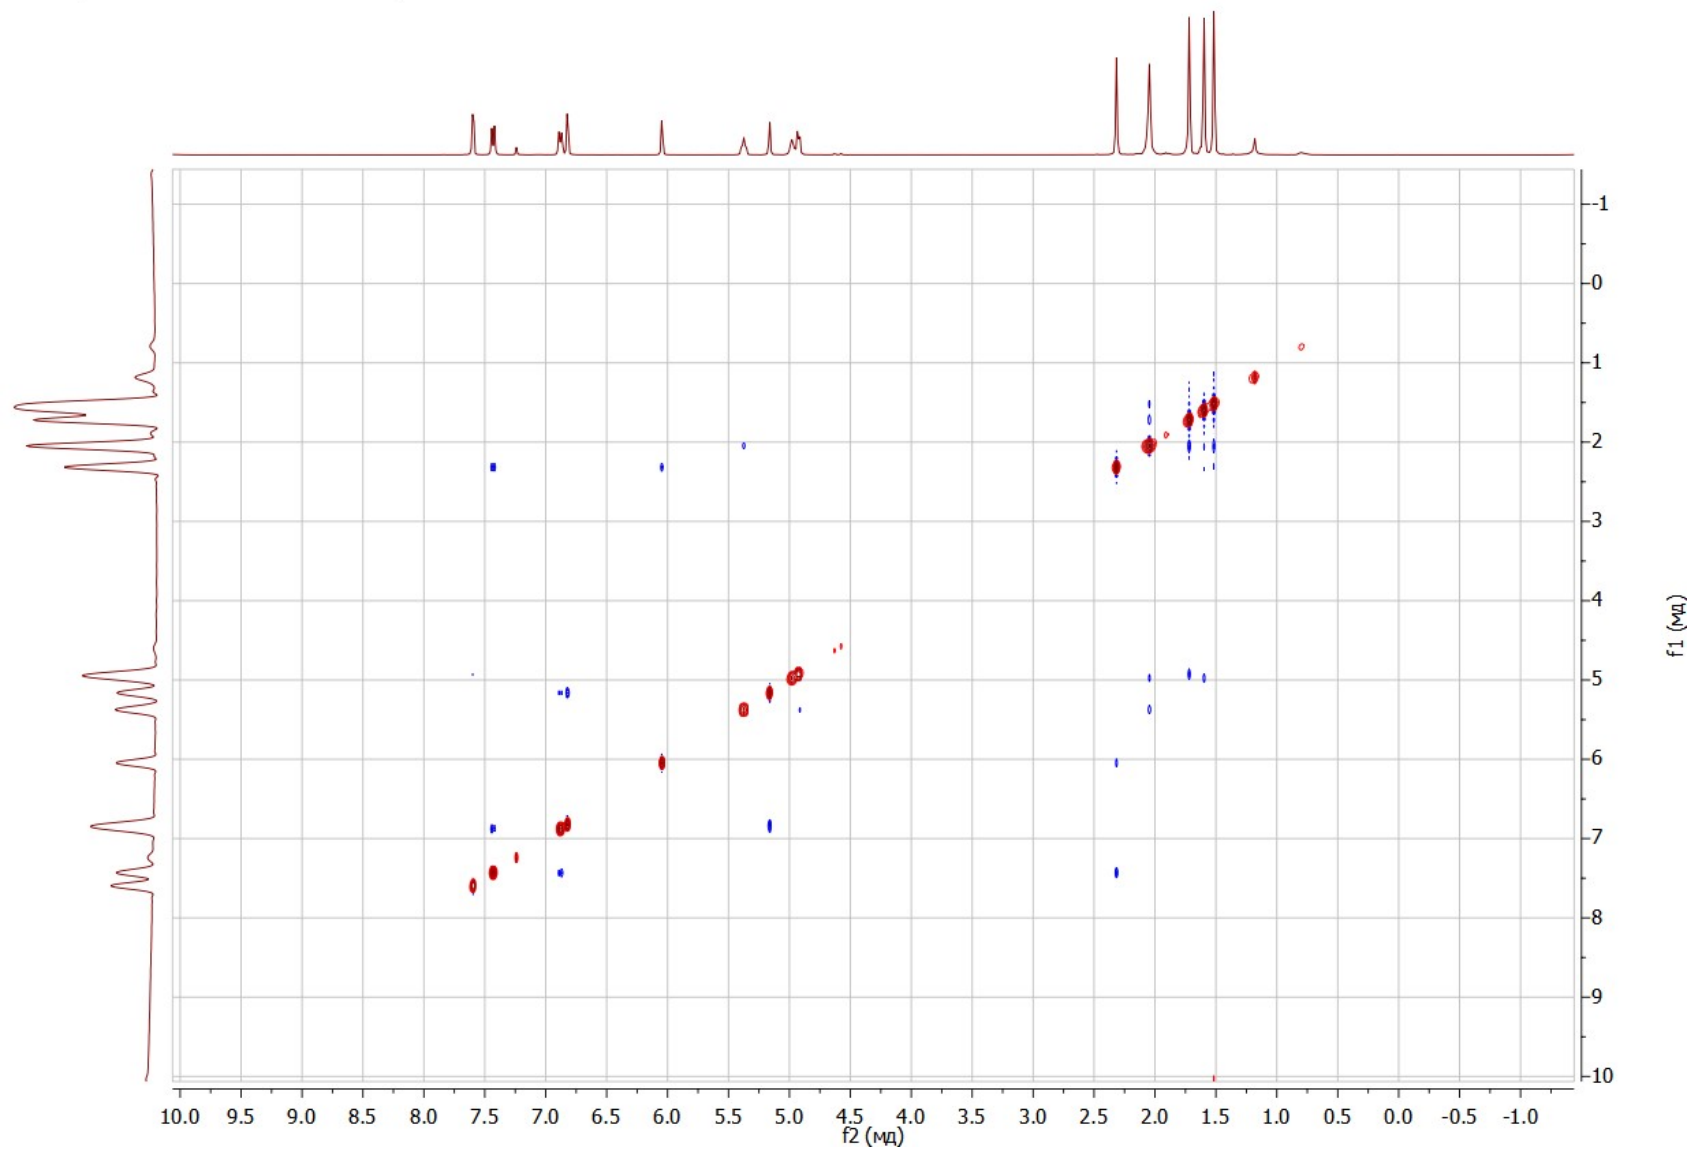

**Fig. S77.**  $^1\text{H}$ - $^{13}\text{C}$  HSQC spectra of the compound **54E**.

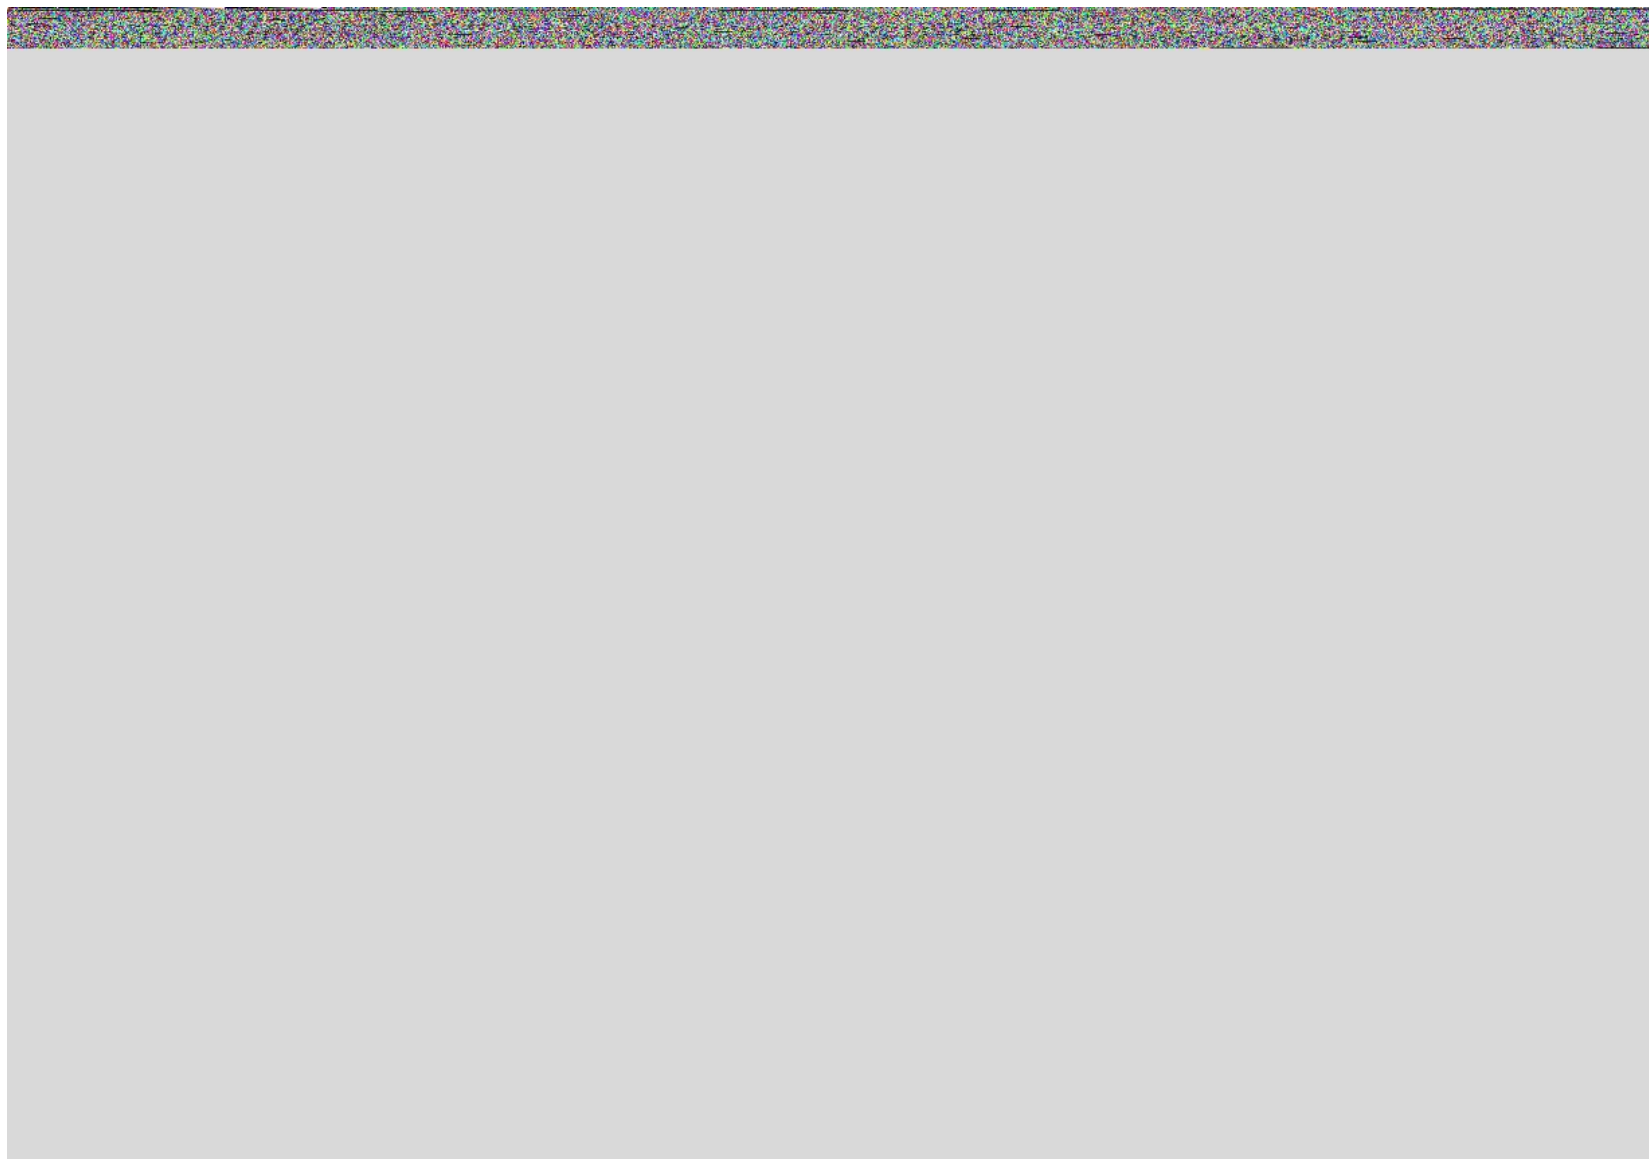

**Fig. S78.**  $^1\text{H}$ - $^{13}\text{C}$  HMBC spectra of the compound **54E**.

lfav-do-cyc11-i2-2d.6.ser — D0-CYC11-I2-2D; CDCl<sub>3</sub> —  $^1\text{H}$ - $^{13}\text{C}$  HMBC

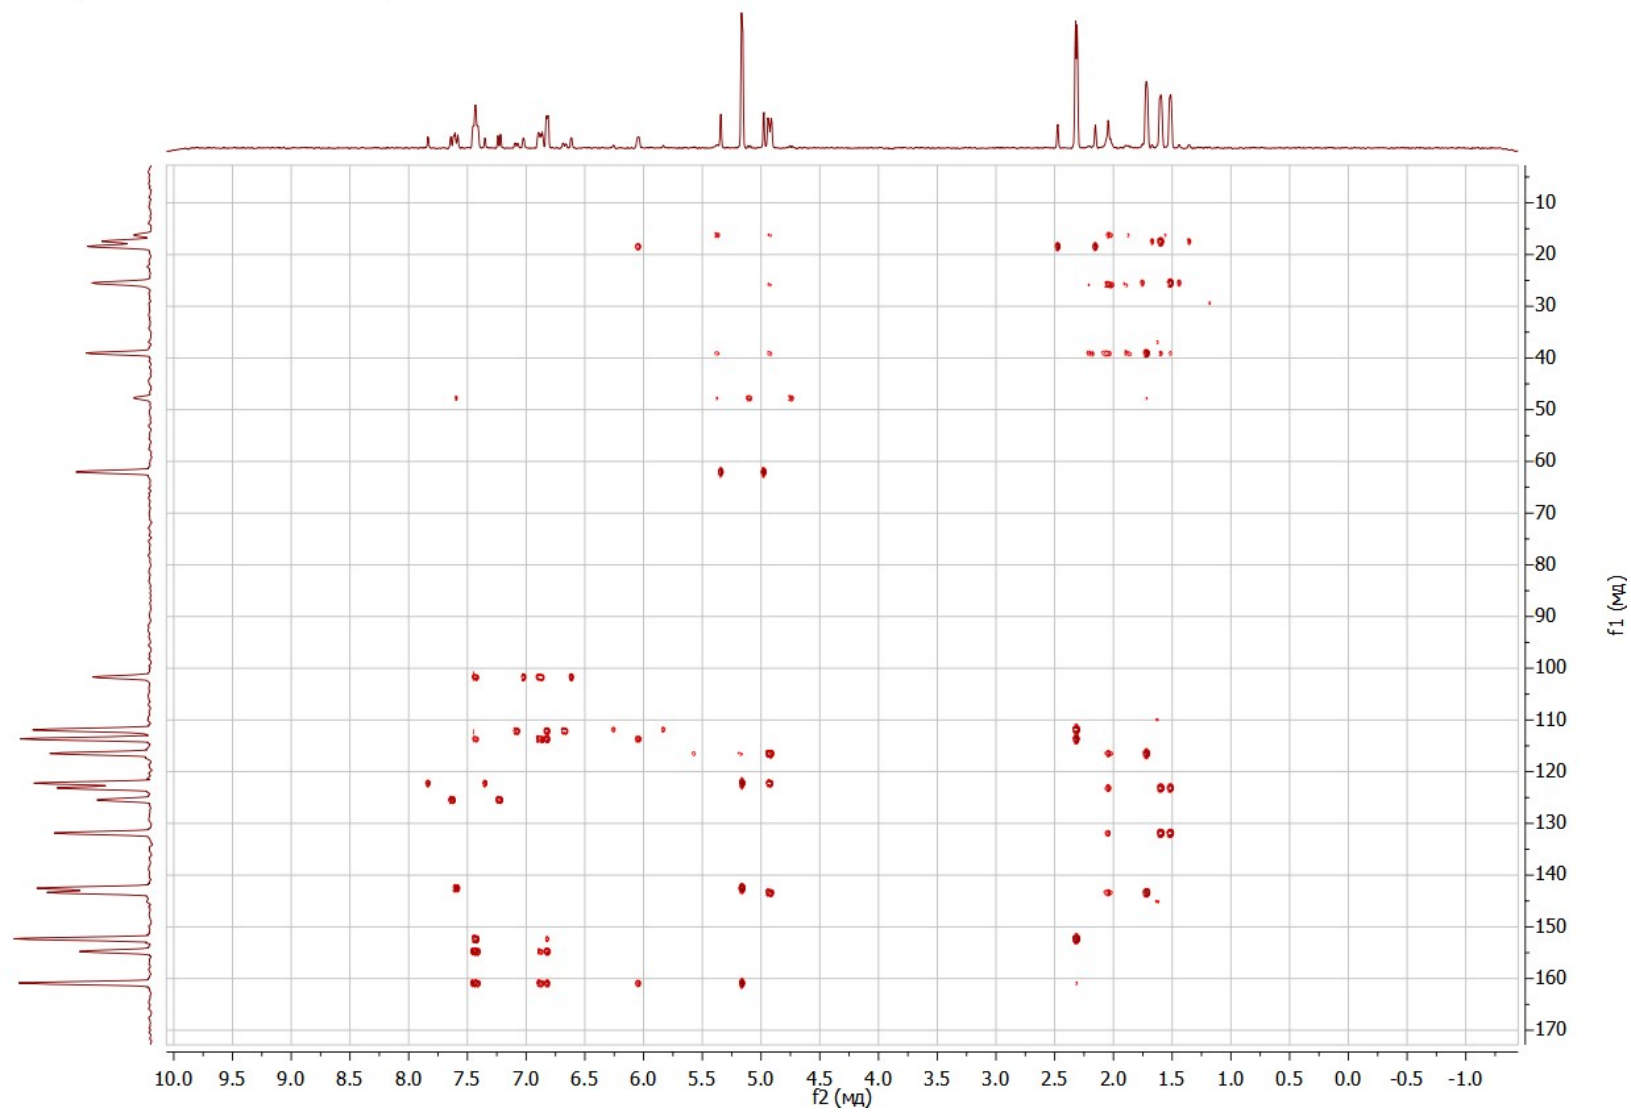

#### 4. UHPLC of compounds

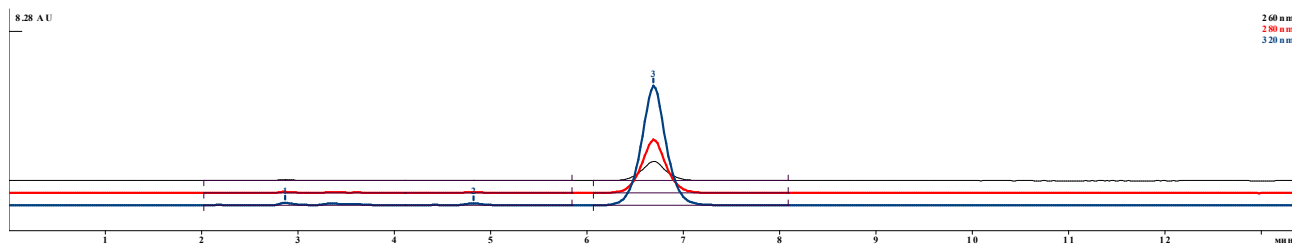

**Fig. S79.** UHPLC of the compound **10**, 94.47% [320 nm]

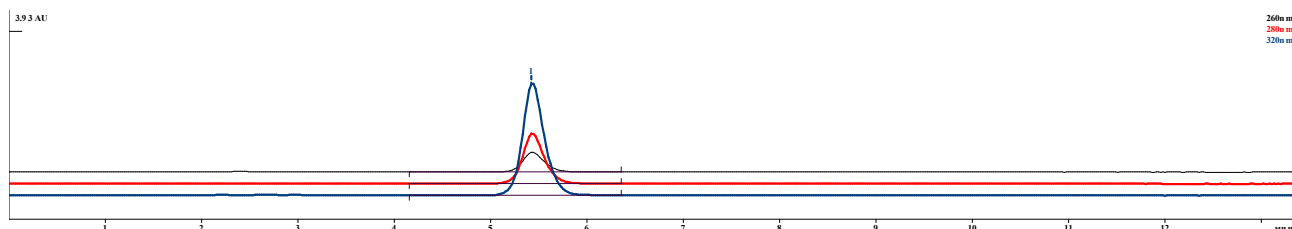

**Fig. S80.** UHPLC of the compound **39**, 98.28% [320 nm]

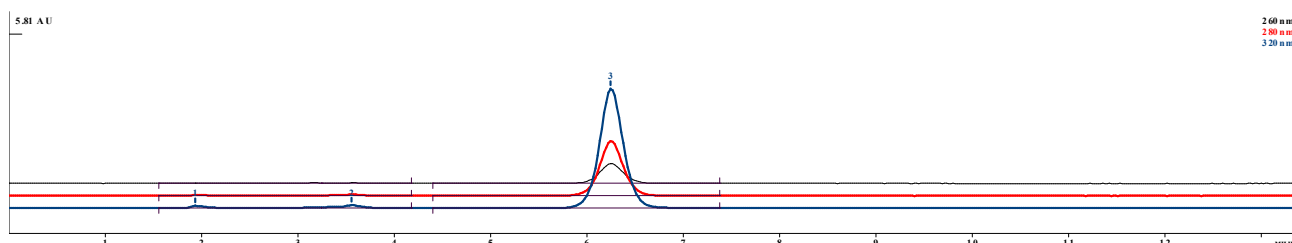

**Fig. S81.** UHPLC of the compound **40**, 95.11% [320 nm]

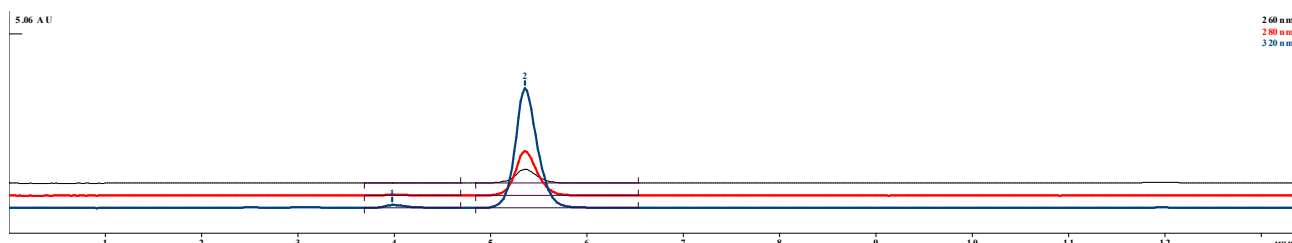

**Fig. S82.** UHPLC of the compound **41**, 97.58% [320 nm]

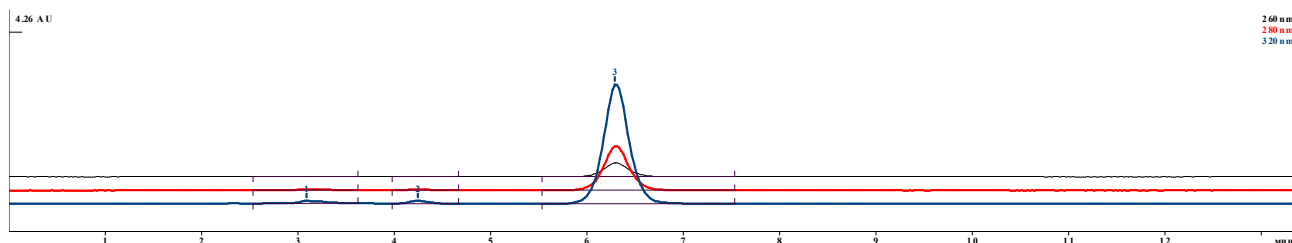

**Fig. S83.** UHPLC of the compound **43**, 95.96% [320 nm]

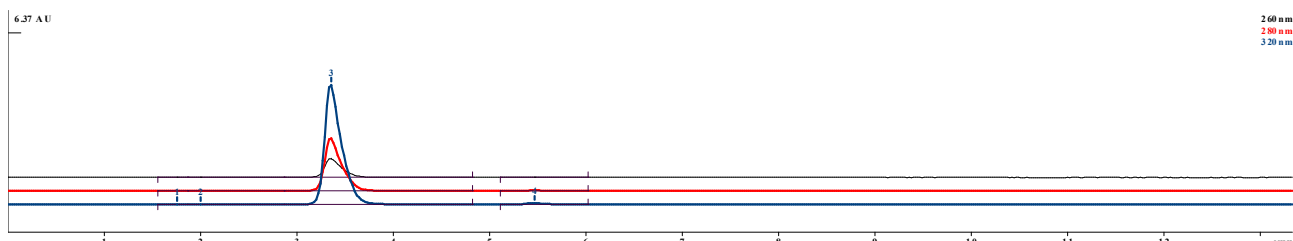

**Fig. S84.** UHPLC of the compound **44**, 97.62% [320 nm]

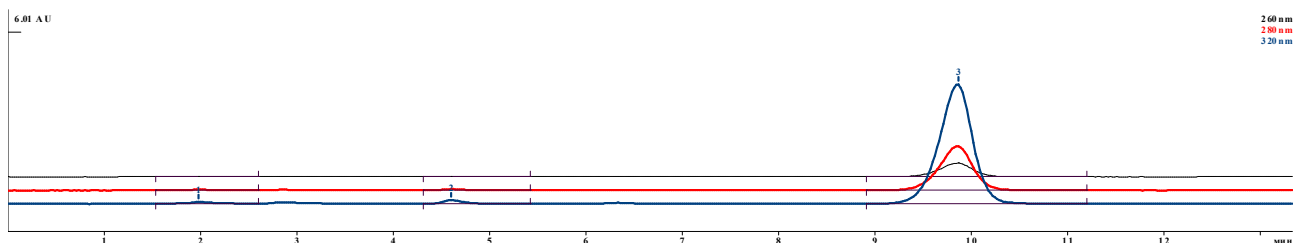

**Fig. S85.** UHPLC of the compound **45**, 96.86 % [320 nm]

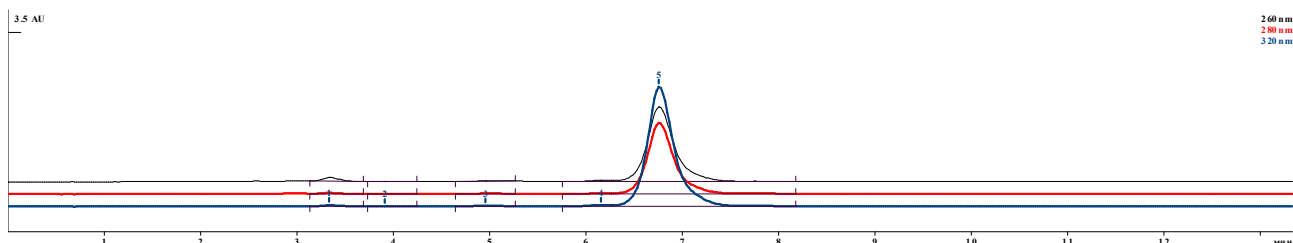

**Fig. S86.** UHPLC of the compound **46**, 98.02% [320 nm]

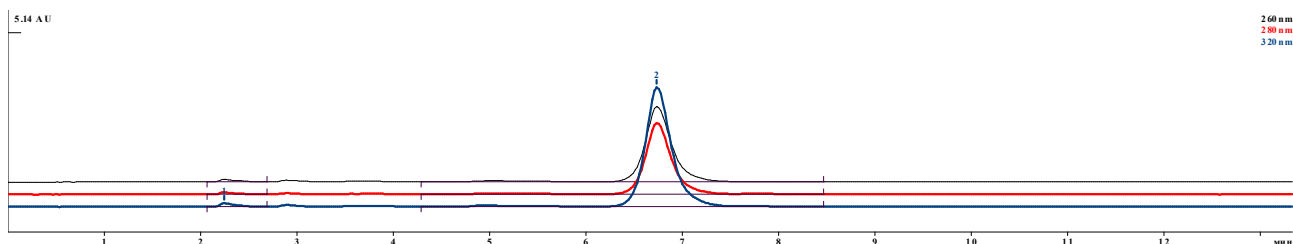

**Fig. S87.** UHPLC of the compound **47**, 98.39% [320 nm], 70%

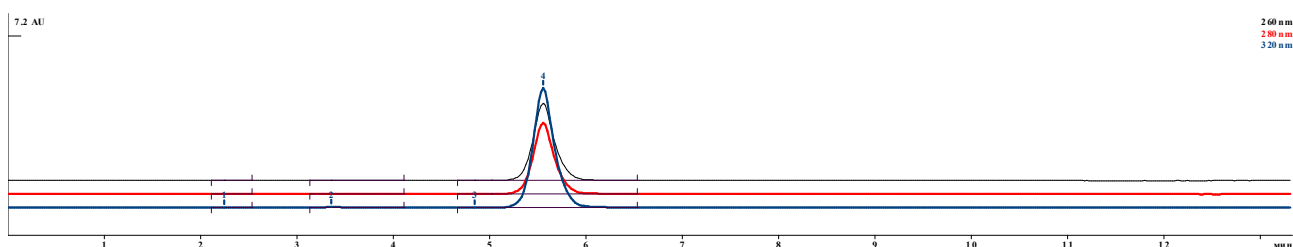

**Fig. S88.** UHPLC of the compound **48**, 99.04% [320]

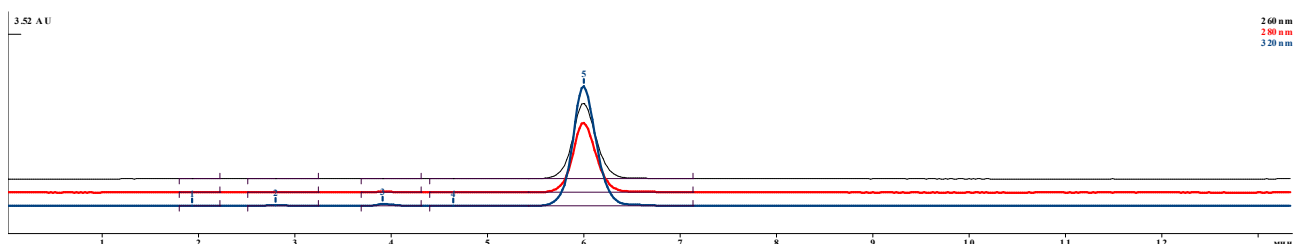

**Fig. S89.** UHPLC of the compound **50**, 97.35% [320 nm]

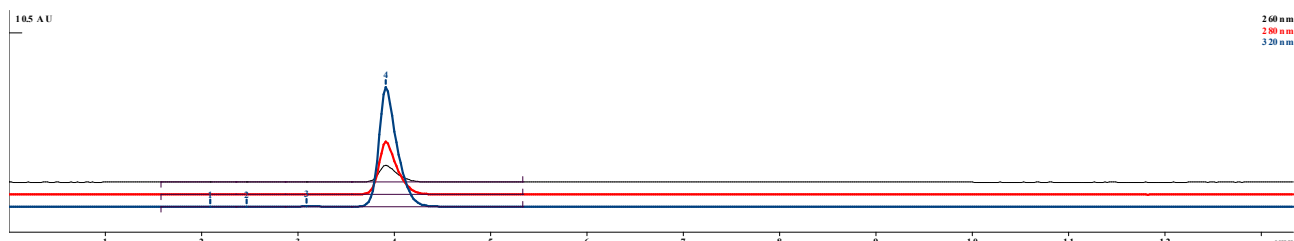

**Fig. S90.** UHPLC of the compound **51**, 98.31% [320 nm]

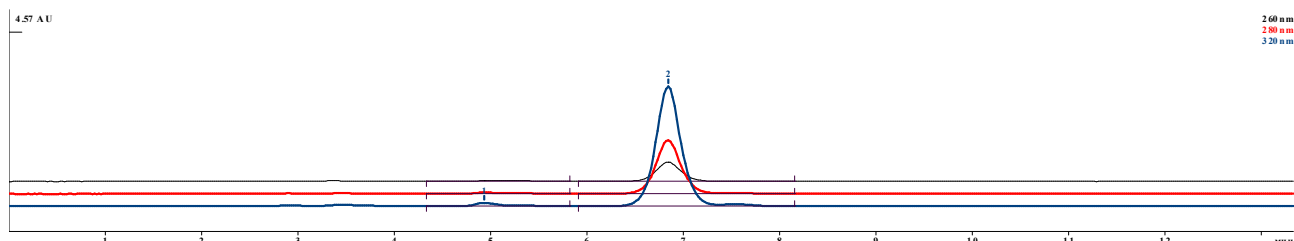

**Fig. S91.** UHPLC of the compound **52**, 97.18% [320 nm]

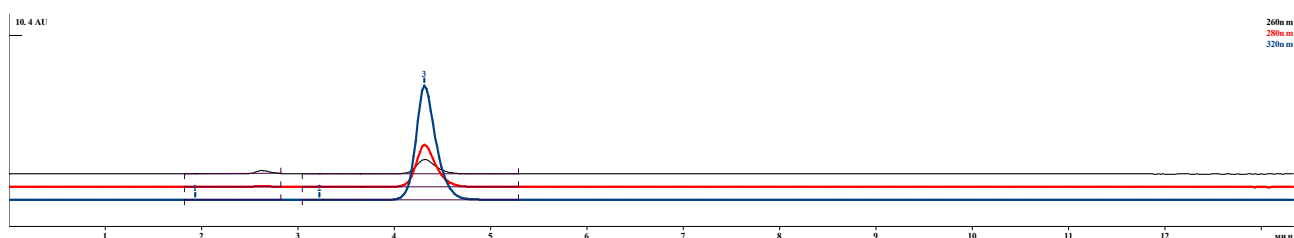

**Fig. S92.** UHPLC of the compound **53**, 99.96% [320 nm]

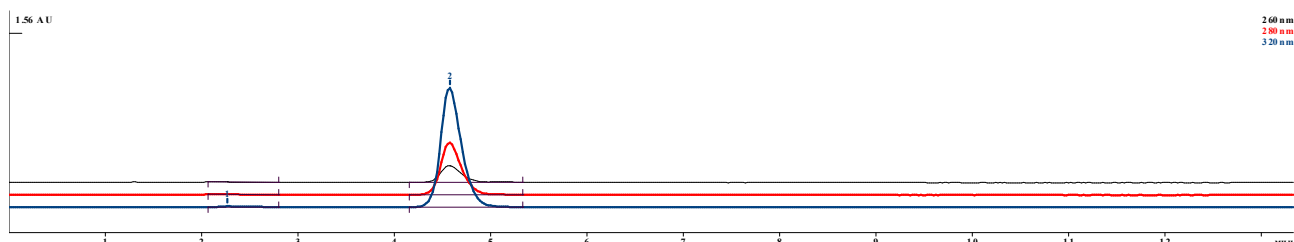

**Fig. S93.** UHPLC of the compound **54 (Z)**, 99.1 % [320 nm]

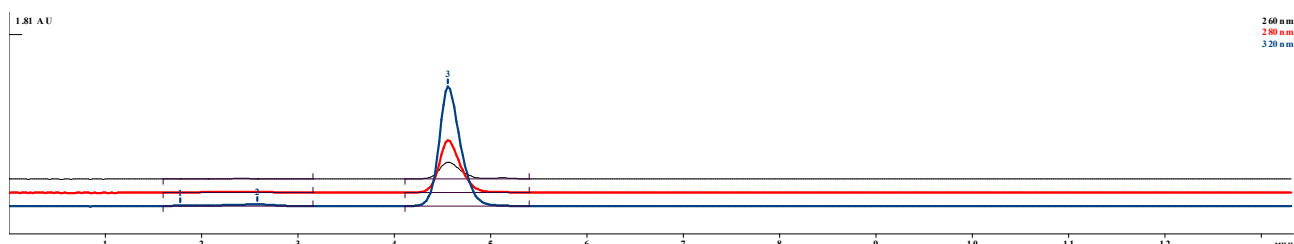

**Fig. S94.** UHPLC of the compound **54 (E)**, 95.90% [320 nm]

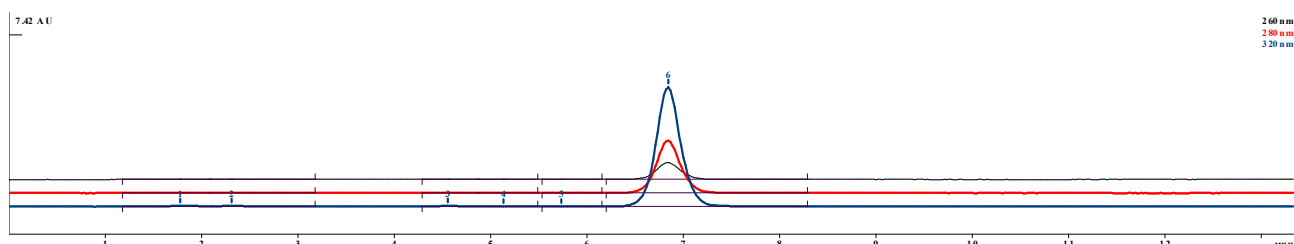

**Fig. S95.** UHPLC of the compound **55**, 97.30% [320]

## 5. Synthesis of compounds 23 to 31.

### i. Synthesis of (+)-Myrtenal 23

50 mL of the aqueous solution of tert-butyl hydroperoxide (70%) was extracted with DCM. To the 50 mL of DCM extract of tert-butyl hydroperoxide were added selenium dioxide (7 mmol) and (+)- $\alpha$ -pinene (88 mmol). The mixture was stirred under reflux for 12 hours. Then, the reaction mixture was slowly neutralized using 10% solution of sodium peroxide, and dried over sodium sulphate. Then, the drying agent was filtered out, the solvent was evaporated, and the leftover mixture was purified using column chromatography (SiO<sub>2</sub>, using mixture of hexane and chloroform with gradually increasing concentration of chloroform from 10 to 100%) The yield of **23** was 70%. Properties of the synthesized alcohol align with the previously published literary data[S1]

### ii. Synthesis of alcohols 24-26.

To the stirred and cooled to 0-5 °C solution of the of **23**, (-)-myrtenal, or cuminaldehyde (61.6 mmol) in 100 mL of methanol, sodium borohydride (61.6 mmol) was added in small portions. Stirring continued for the next 3 hours, then 5% solution of hydrochloric acid was added slowly, until the target pH of 4 to 5 was achieved. Methanol was evaporated, the reaction mixture was subsequently extracted with diethyl ether, and the extract was then dried over sodium sulphate. The drying agent was filtered off, and diethyl ether was evaporated. The yields of **24**, **25**, and **26** were 55%, 72%, and 90% respectively. Properties of the synthesized alcohols align with the previously published literary data[S2-S4]

### iii. Synthesis of bromides 27-31.

To the stirred and cooled to 0-5 °C solution of **24**, **25**, **26**, geraniol, or 3,7-dimethyloctanol (27.7 mmol) in 30 mL of dry diethyl ether, phosphorus tribromide (8.9 mmol) was added dropwise. Stirring was continued for 1 hour under low temperature, then continued for two hours under room temperature. After the completion of the reaction, the aqueous solution of sodium bicarbonate was added to the reaction mixture until the unreacted phosphorus tribromide was completely neutralized. The organic layer was separated, washed with brine, and subsequently evaporated. The yields of compounds **27** to **31** were 75%, 64%, 90%, 96%, and 88% respectively. Properties of the synthesized bromides align with the previously published literary data[S5-S8]

## 6. References.

- S1. F. Kaplan, C.O. Schulz, D. Weisleder, C.E. Klopfenstein, *J. Org. Chem.*, 1968, 33, 1728–1730.
- S2. S. Lee, *Magn. Reson. Chem.*, 2002, 40, 311–312.
- S3. F. Giraud, C. Loge, F. Pagniez, D. Crepin, S. Barres, C. Picot, P. le Pape, M. le Borgne, *J. Enzyme Inhib. Med. Chem.*, 2009, 24, 1067–1075.
- S4. F. Bohlmann, R. Zeisberg, E. Klein, *Org. Magn. Reson.*, 1975, 7, 426–432.
- S5. H.-X. Liu, H.-B. Tan, M.-T. He, L. Li, Y.-H. Wang, C.-L. Long, *Tetrahedron*, 2015, 71, 2369–2375.
- S6. D.D.M. Wayner, D.R. Arnold, *Can. J. Chem.*, 1985, 63, 2378–2383.
- S7. V.M. Dixit, F.M. Laskovics, W.I. Noall, C.D. Poulter, *J. Org. Chem.*, 1981, 46, 1967–1969.
- S8. M. Fujiki, J.R. Koe, M. Motonaga, H. Nakashima, K. Terao, A. Teramoto, *J. Am. Chem. Soc.*, 2001, 123, 6253–6261.
